# Supplementary material for: Synthesis and Antiangiogenic Activity of N-Alkylated Levamisole Derivatives
Source: PubMed Central journal article supplement (PMC3443238; doi:10.1371/journal.pone.0045405), 2012-09-14
Supplement: pone.0045405.s001.pdf [file pone.0045405.s001.pdf]

# Supporting Information

## Synthesis and Antiangiogenic Activity of N-Alkylated Levamisole Derivatives

Anders N. Hansen<sup>1,#</sup>, Christine D. Bendiksen<sup>2,#</sup>, Lene Sylvest<sup>2</sup>, Tina Friis<sup>2</sup>, Dan Staerk<sup>1,3</sup>,  
Flemming S. Jørgensen<sup>1</sup>, Christian A. Olsen<sup>1,4,\*</sup>, and Gunnar Houen<sup>2,\*</sup>

\* E-mails: [cao@kemi.dtu.dk](mailto:cao@kemi.dtu.dk) (CAO) and [gh@ssi.dk](mailto:gh@ssi.dk) (GH).

### Contents:

**Page S2–S9**; LC-MS data.

**Page S10–S36**; <sup>1</sup>H NMR, <sup>13</sup>C NMR, and DEPT 135 spectra.

(**7a** S10–12, **7b** S13–15, **8a** S16–18, **8b** S19–21, **9** S22–24, **10** S25–27, **11a** S28–30,  
**11b** S31–33, and **12** S34–36)

**Page S37**; Table S1.

# Compound 7a

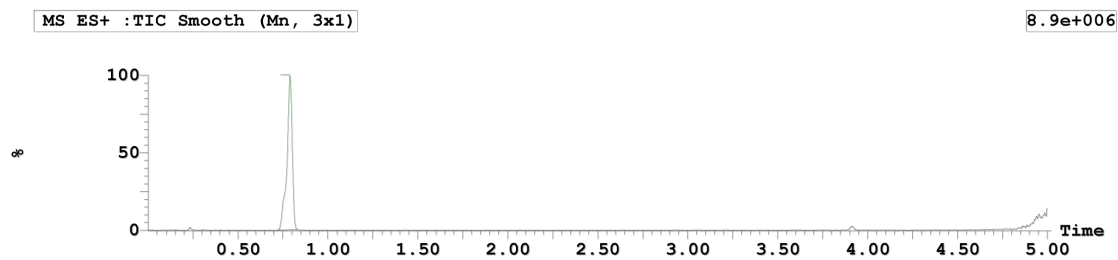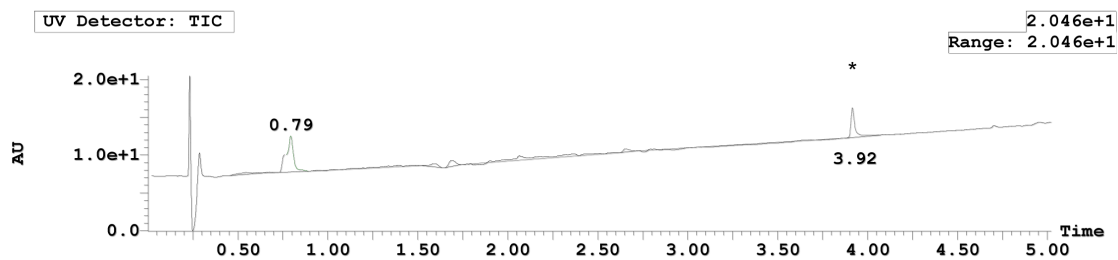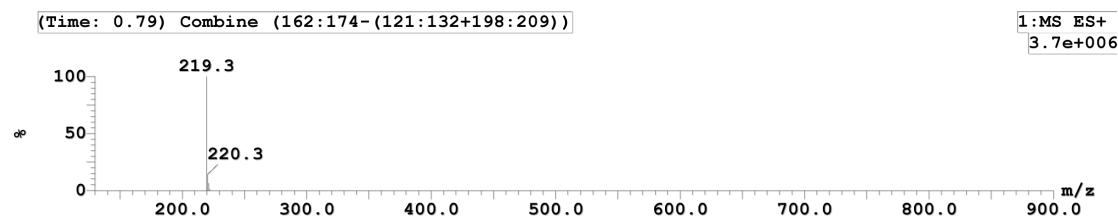

\*Ghost peak from the UPLC-MS system.

Compound 7b

MS ES+ :TIC Smooth (Mn, 3x1)

4.1e+007

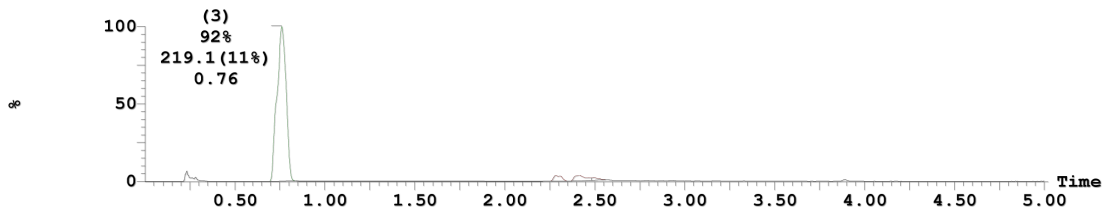

UV Detector: TIC

2.144e+1

Range: 2.144e+1

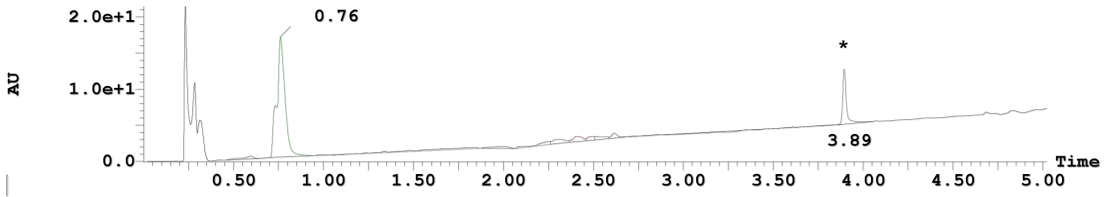

(Time: 0.76) Combine (156:168-(115:126+200:211))

1:MS ES+  
2.7e+007

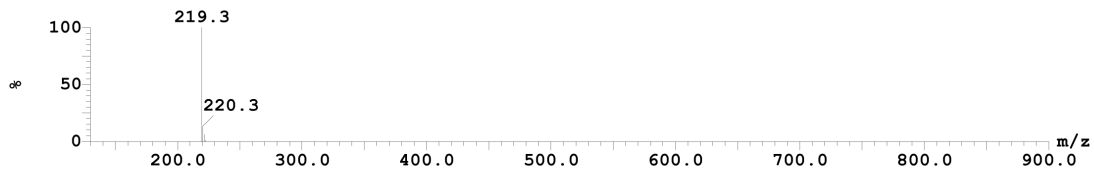

Compound 8a

MS ES+ :TIC Smooth (Mn, 3x1)

2.7e+007

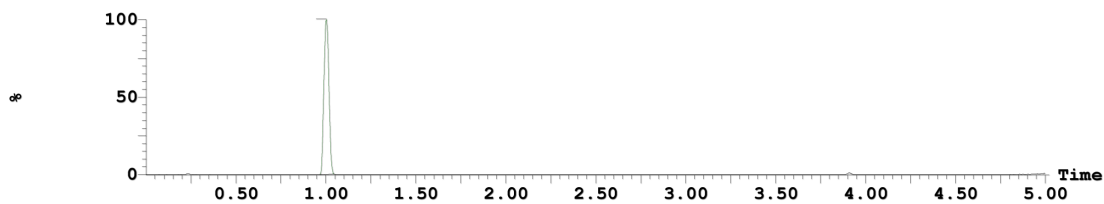

UV Detector: TIC

2.053e+1

Range: 2.053e+1

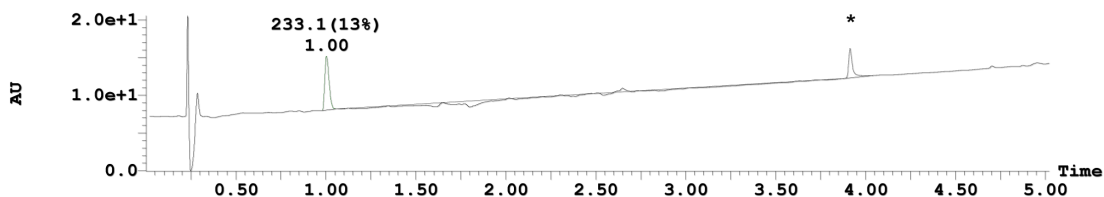

(Time: 1.00) Combine (208:220-(173:184+244:255))

1:MS ES+

1.2e+007

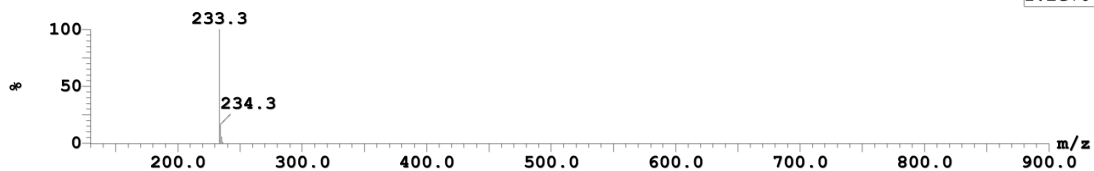

Compound 9

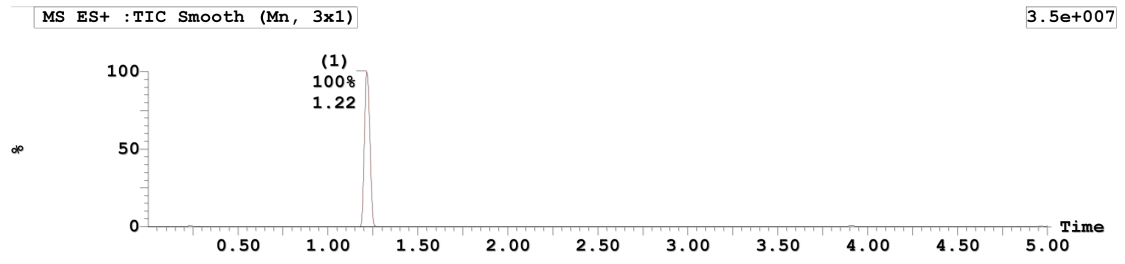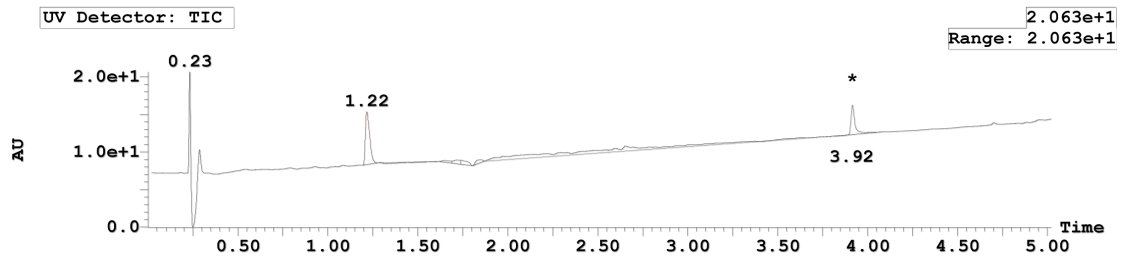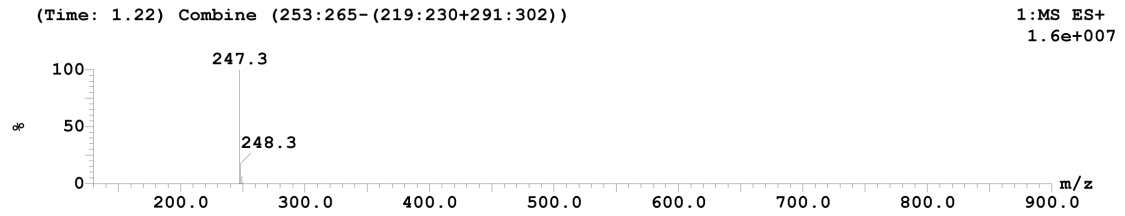

# Compound 10

MS ES+ :TIC Smooth (Mn, 3x1)

4.2e+007

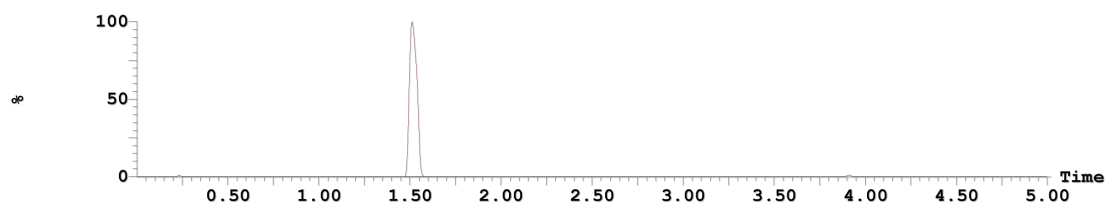

UV Detector: TIC

2.02e+1  
Range: 2.019e+1

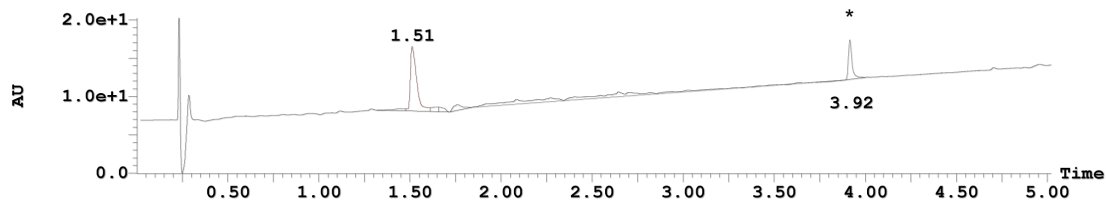

(Time: 1.51) Combine (316:328-(281:292+357:368))

1:MS ES+  
2.3e+007

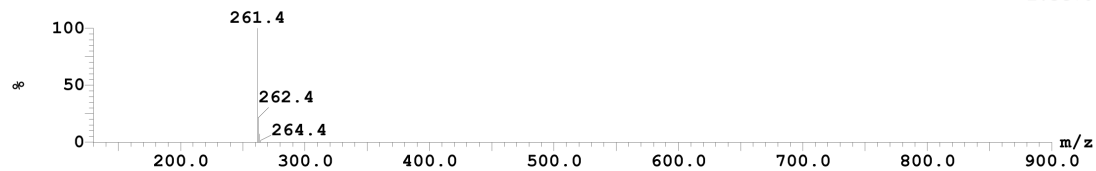

Compound 11a

MS ES+ :TIC Smooth (Mn, 3x1)

5.6e+007

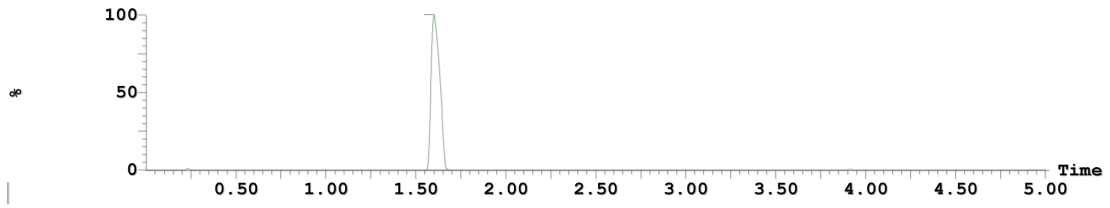

UV Detector: TIC

2.058e+1

Range: 2.057e+1

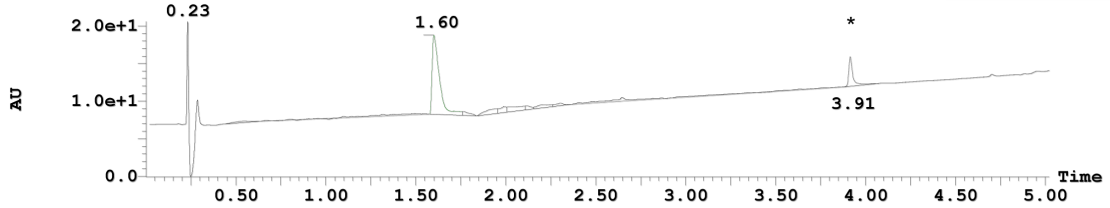

(Time: 1.60) Combine (335:347-(299:310+380:391))

1:MS ES+

3.3e+007

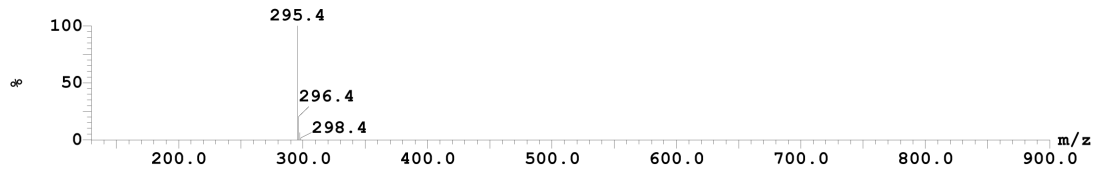

Compound 11b

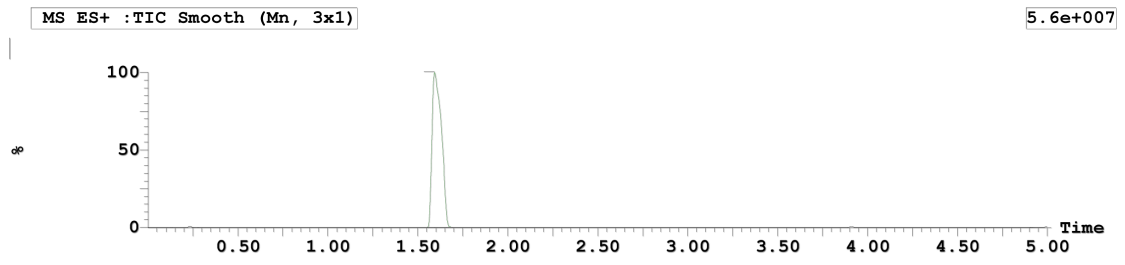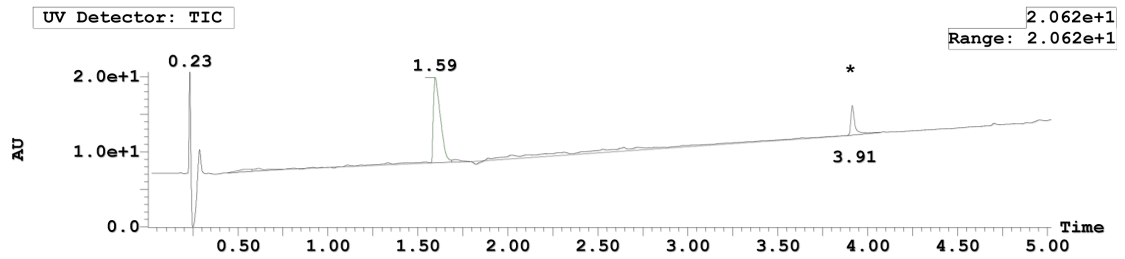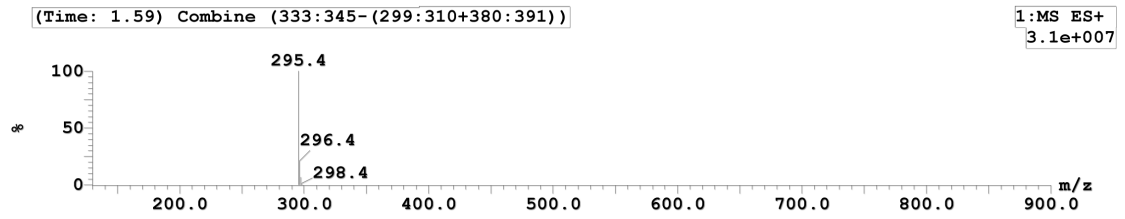



Compound 12

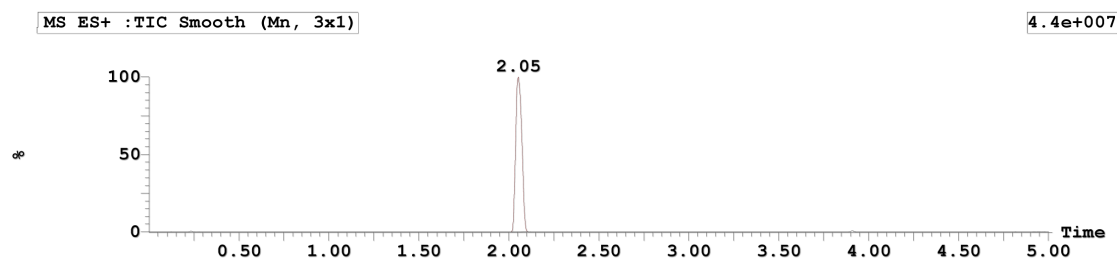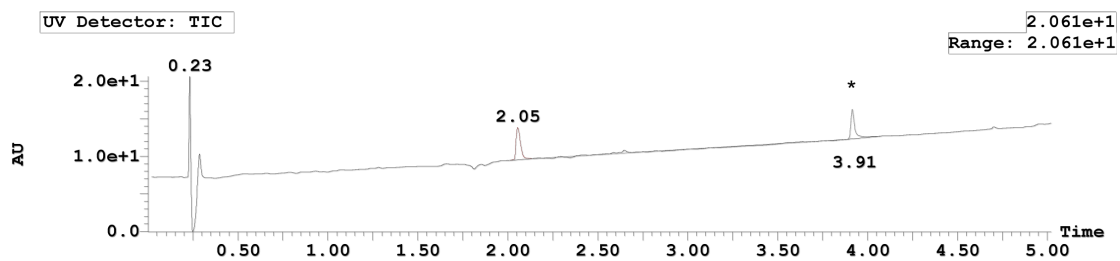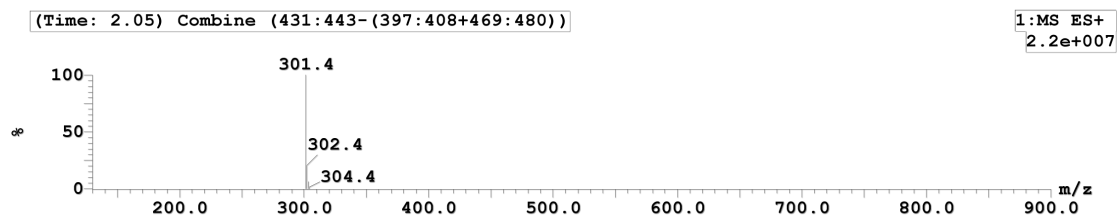

anh.231006 10 1 d: dan

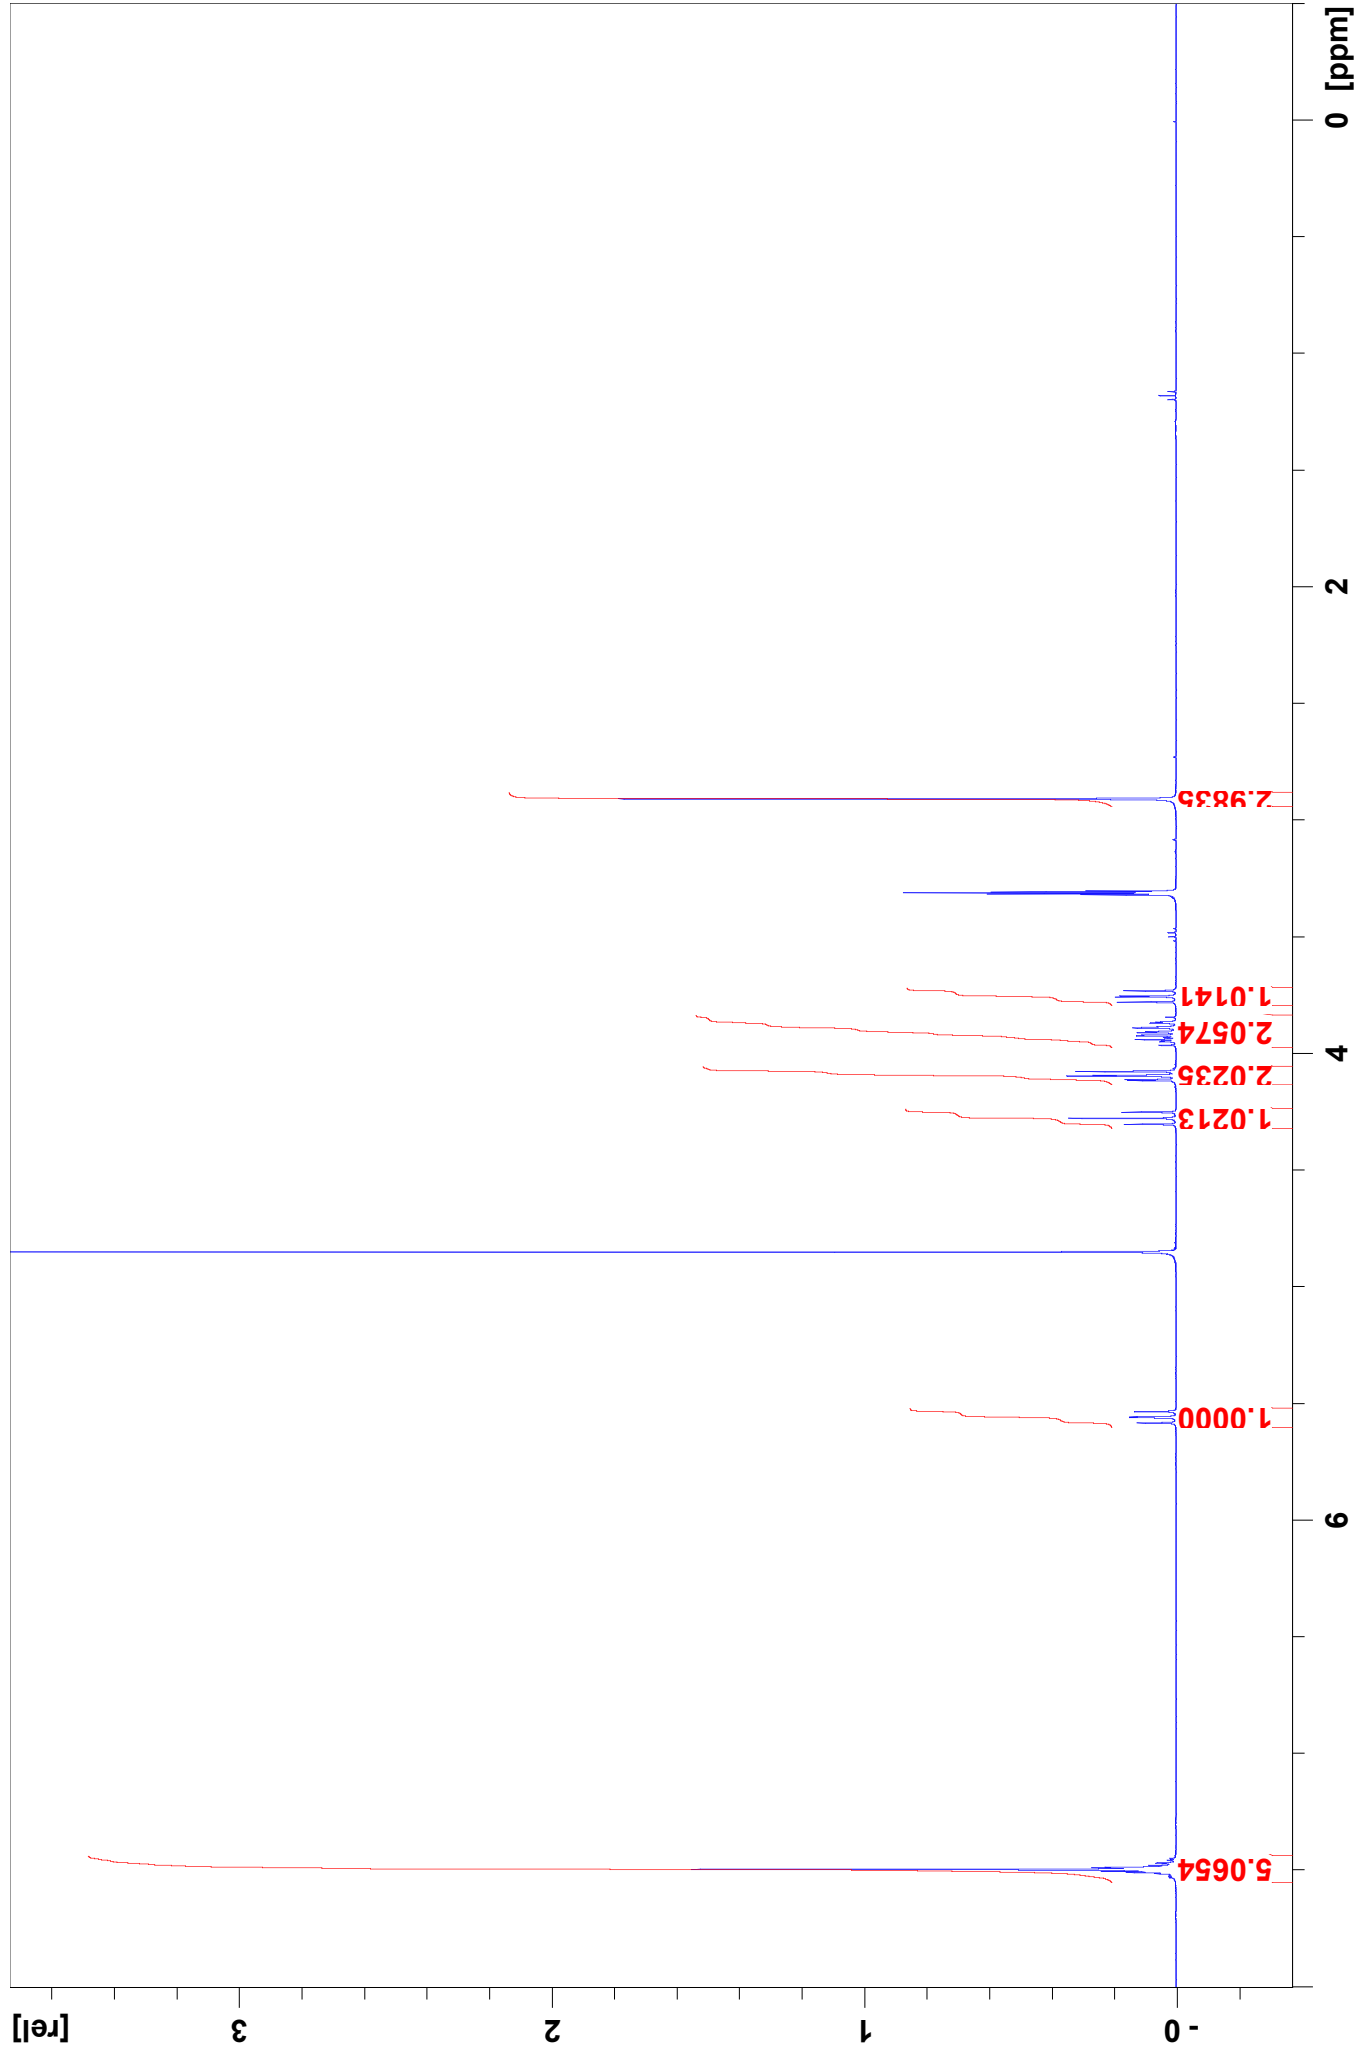

anh.231006 11 1 d: dan

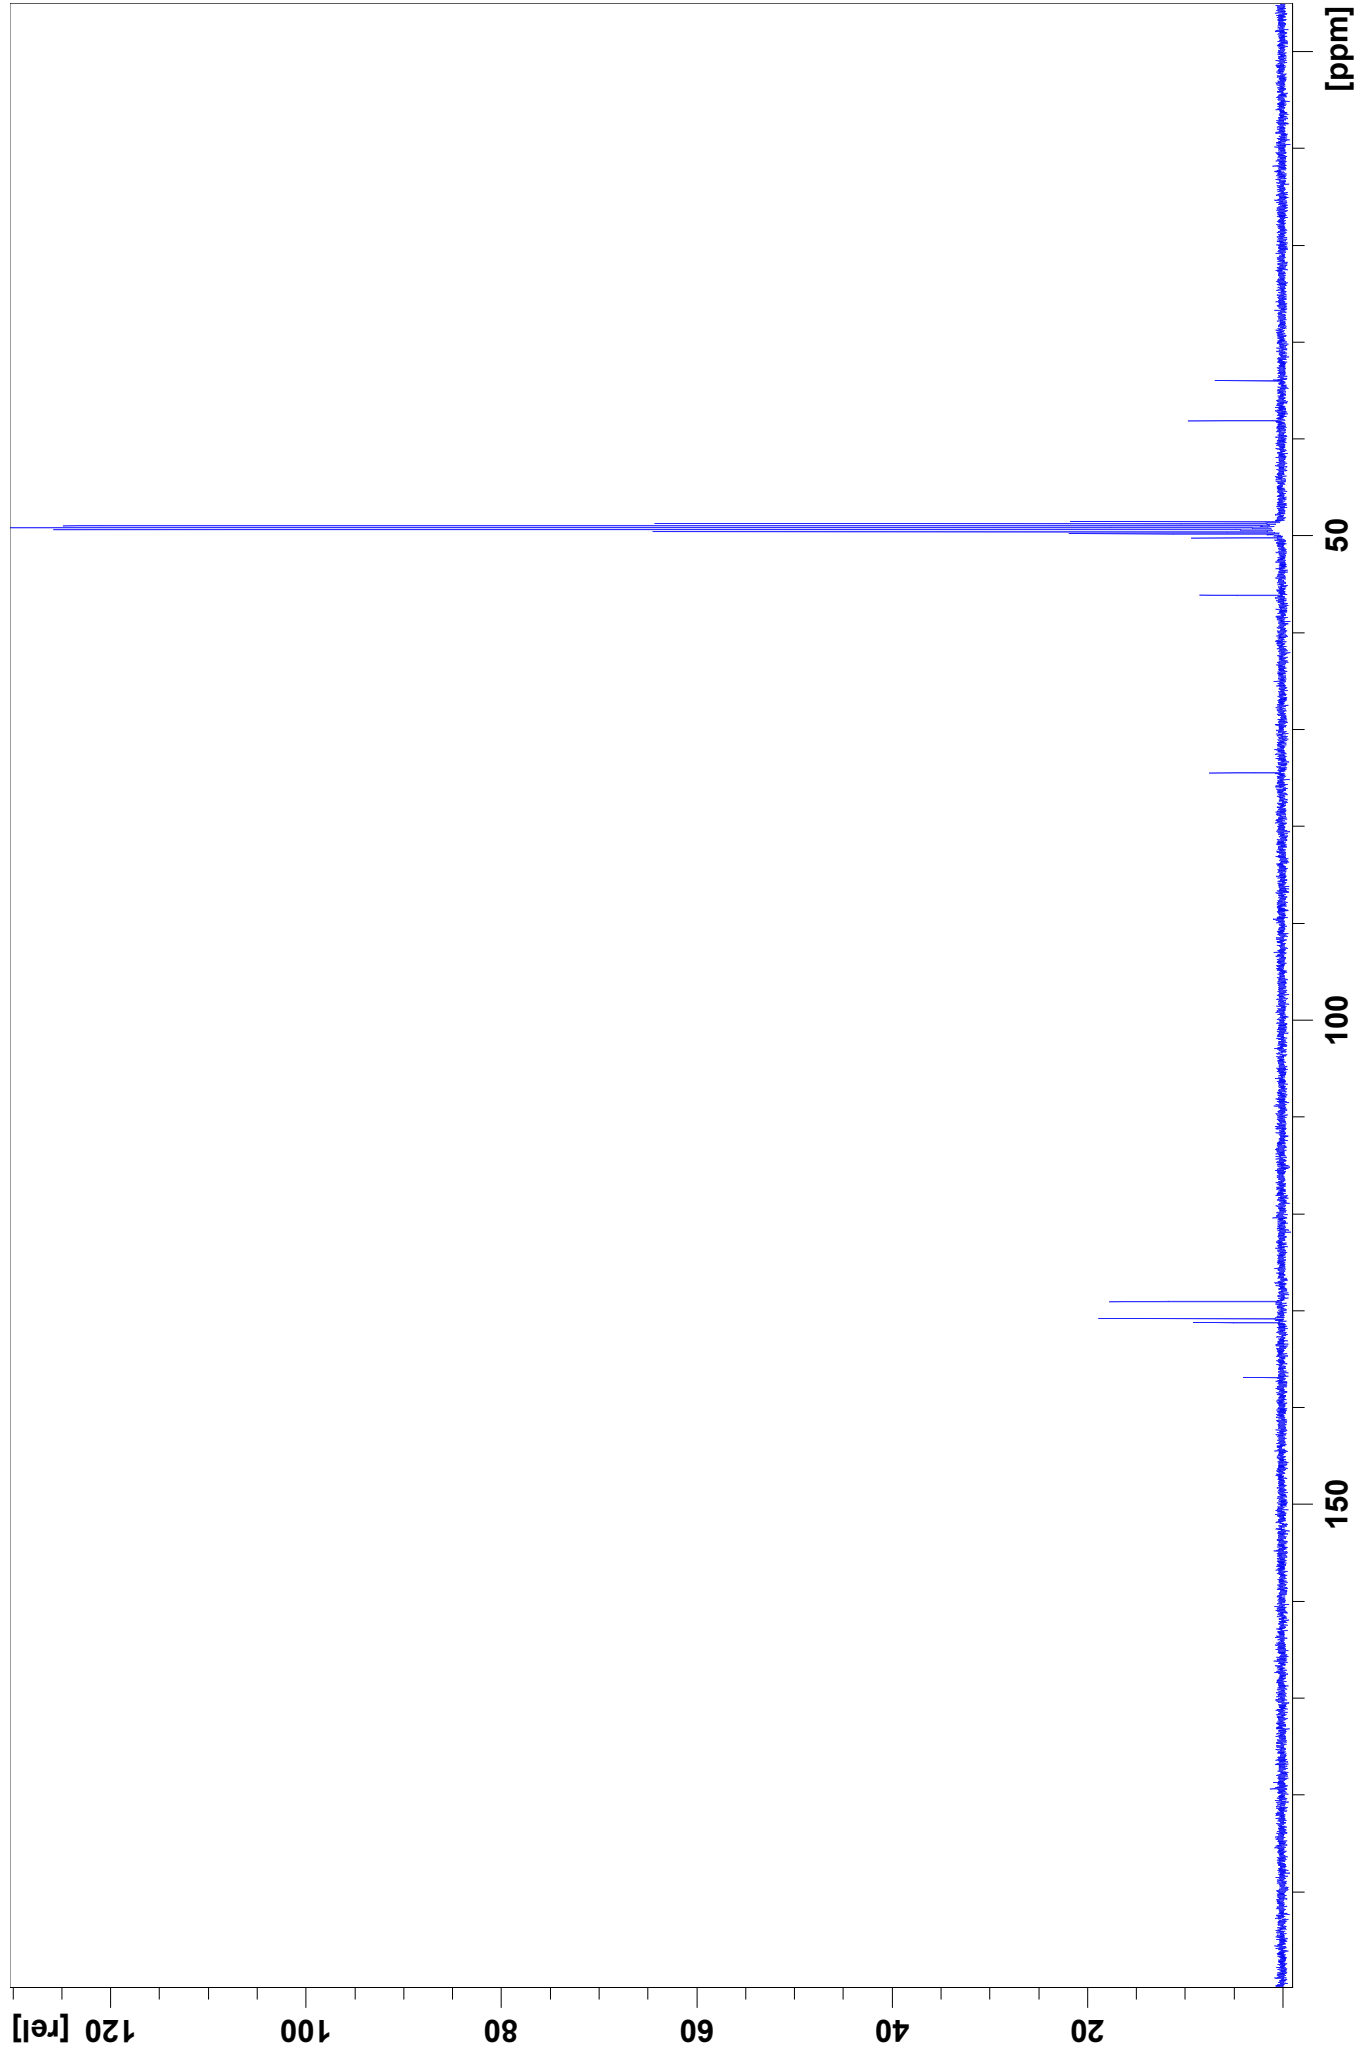

anh.231006 12 1 d: dan

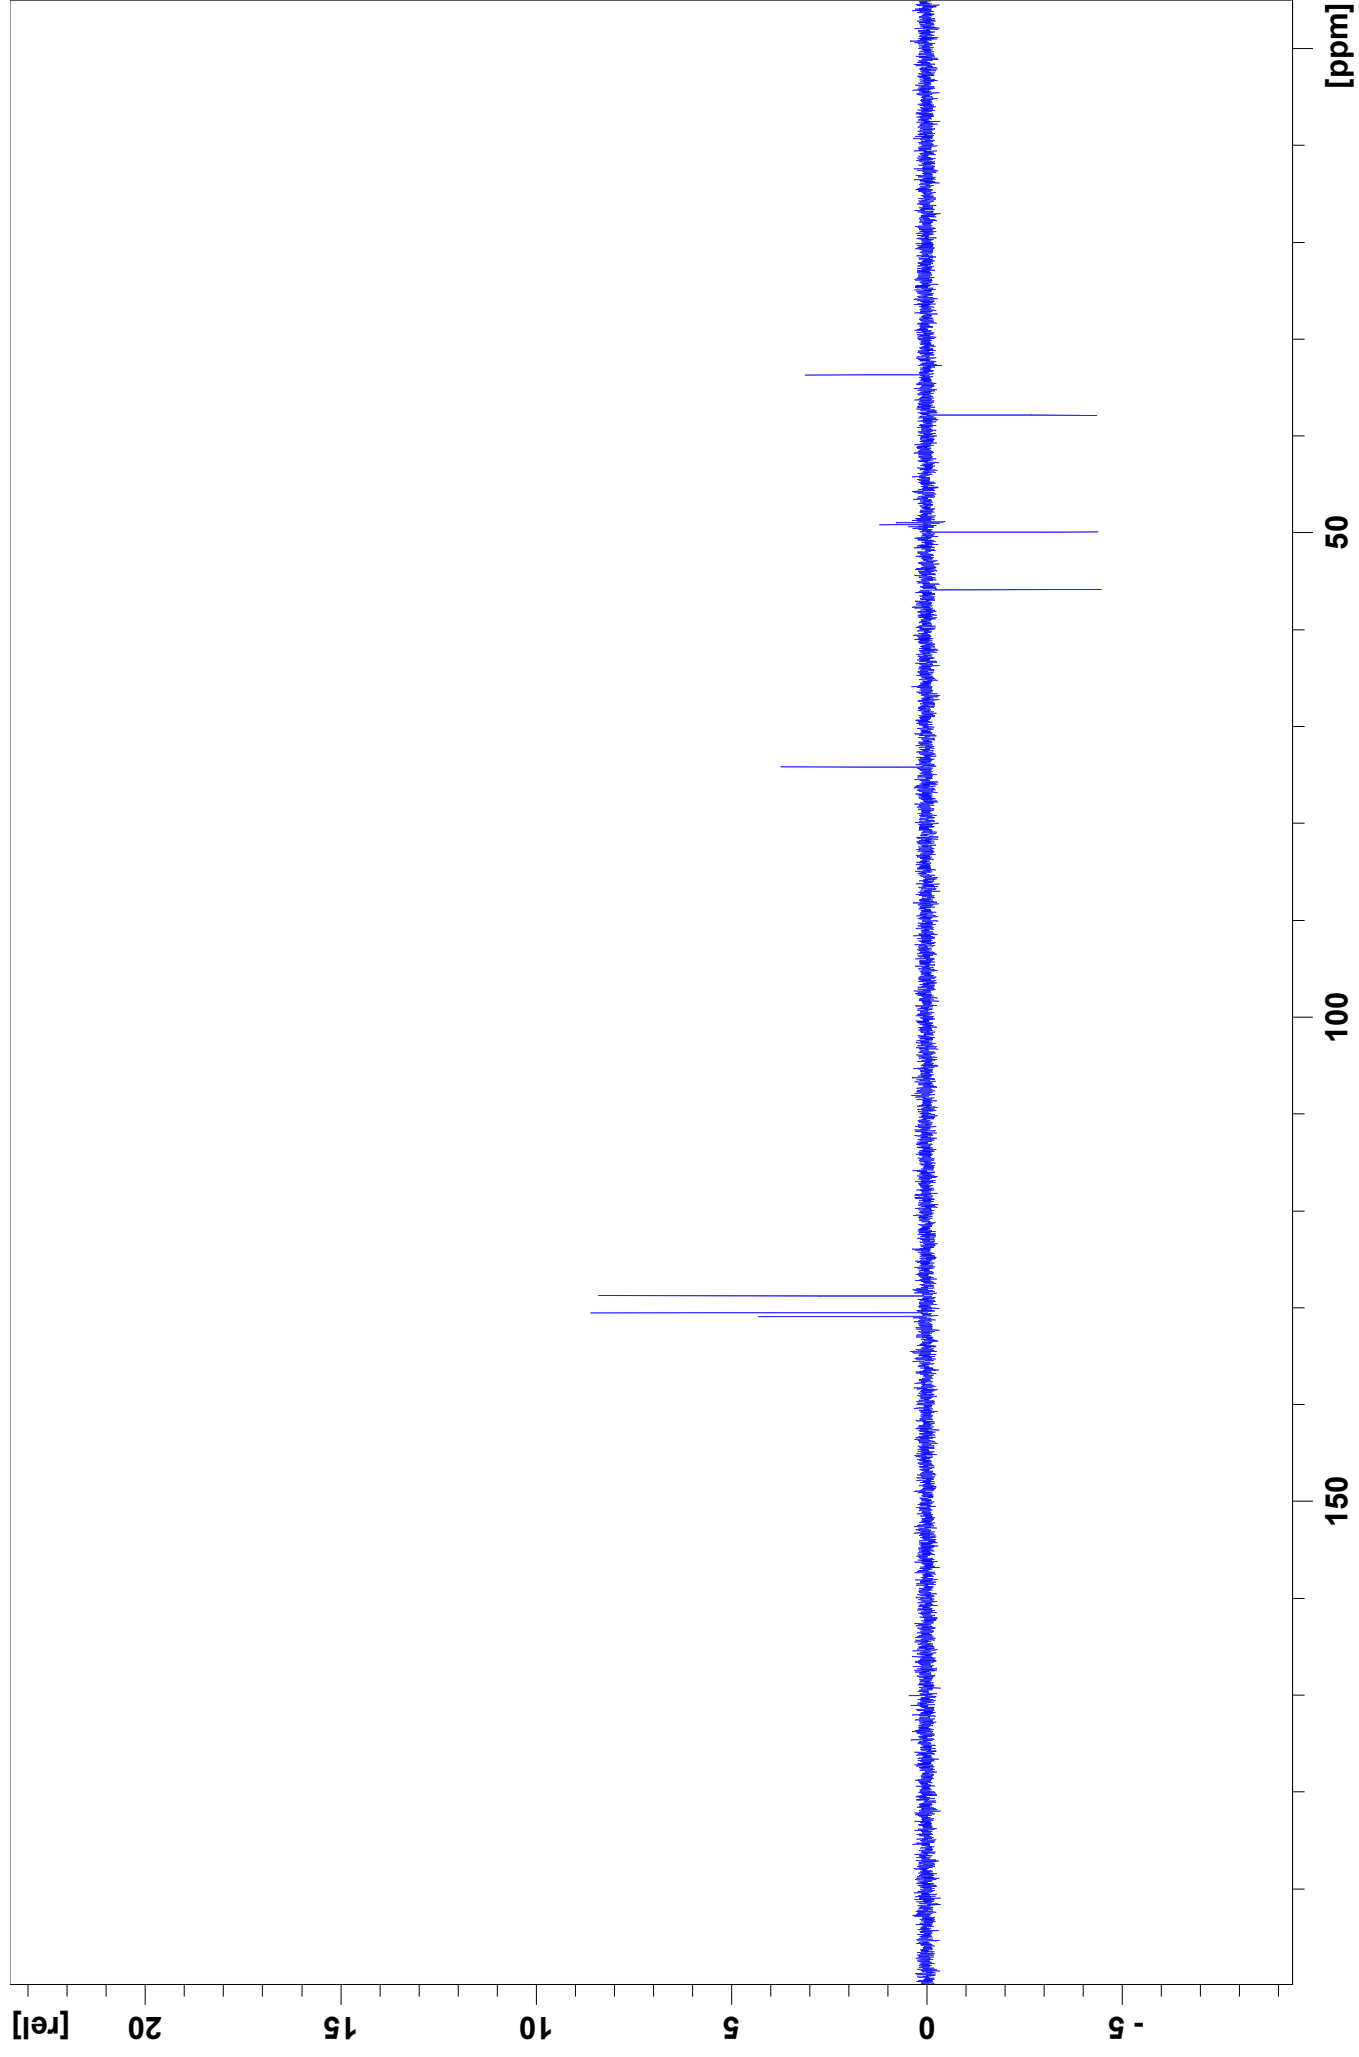

anh.250107 4 1 d: dan

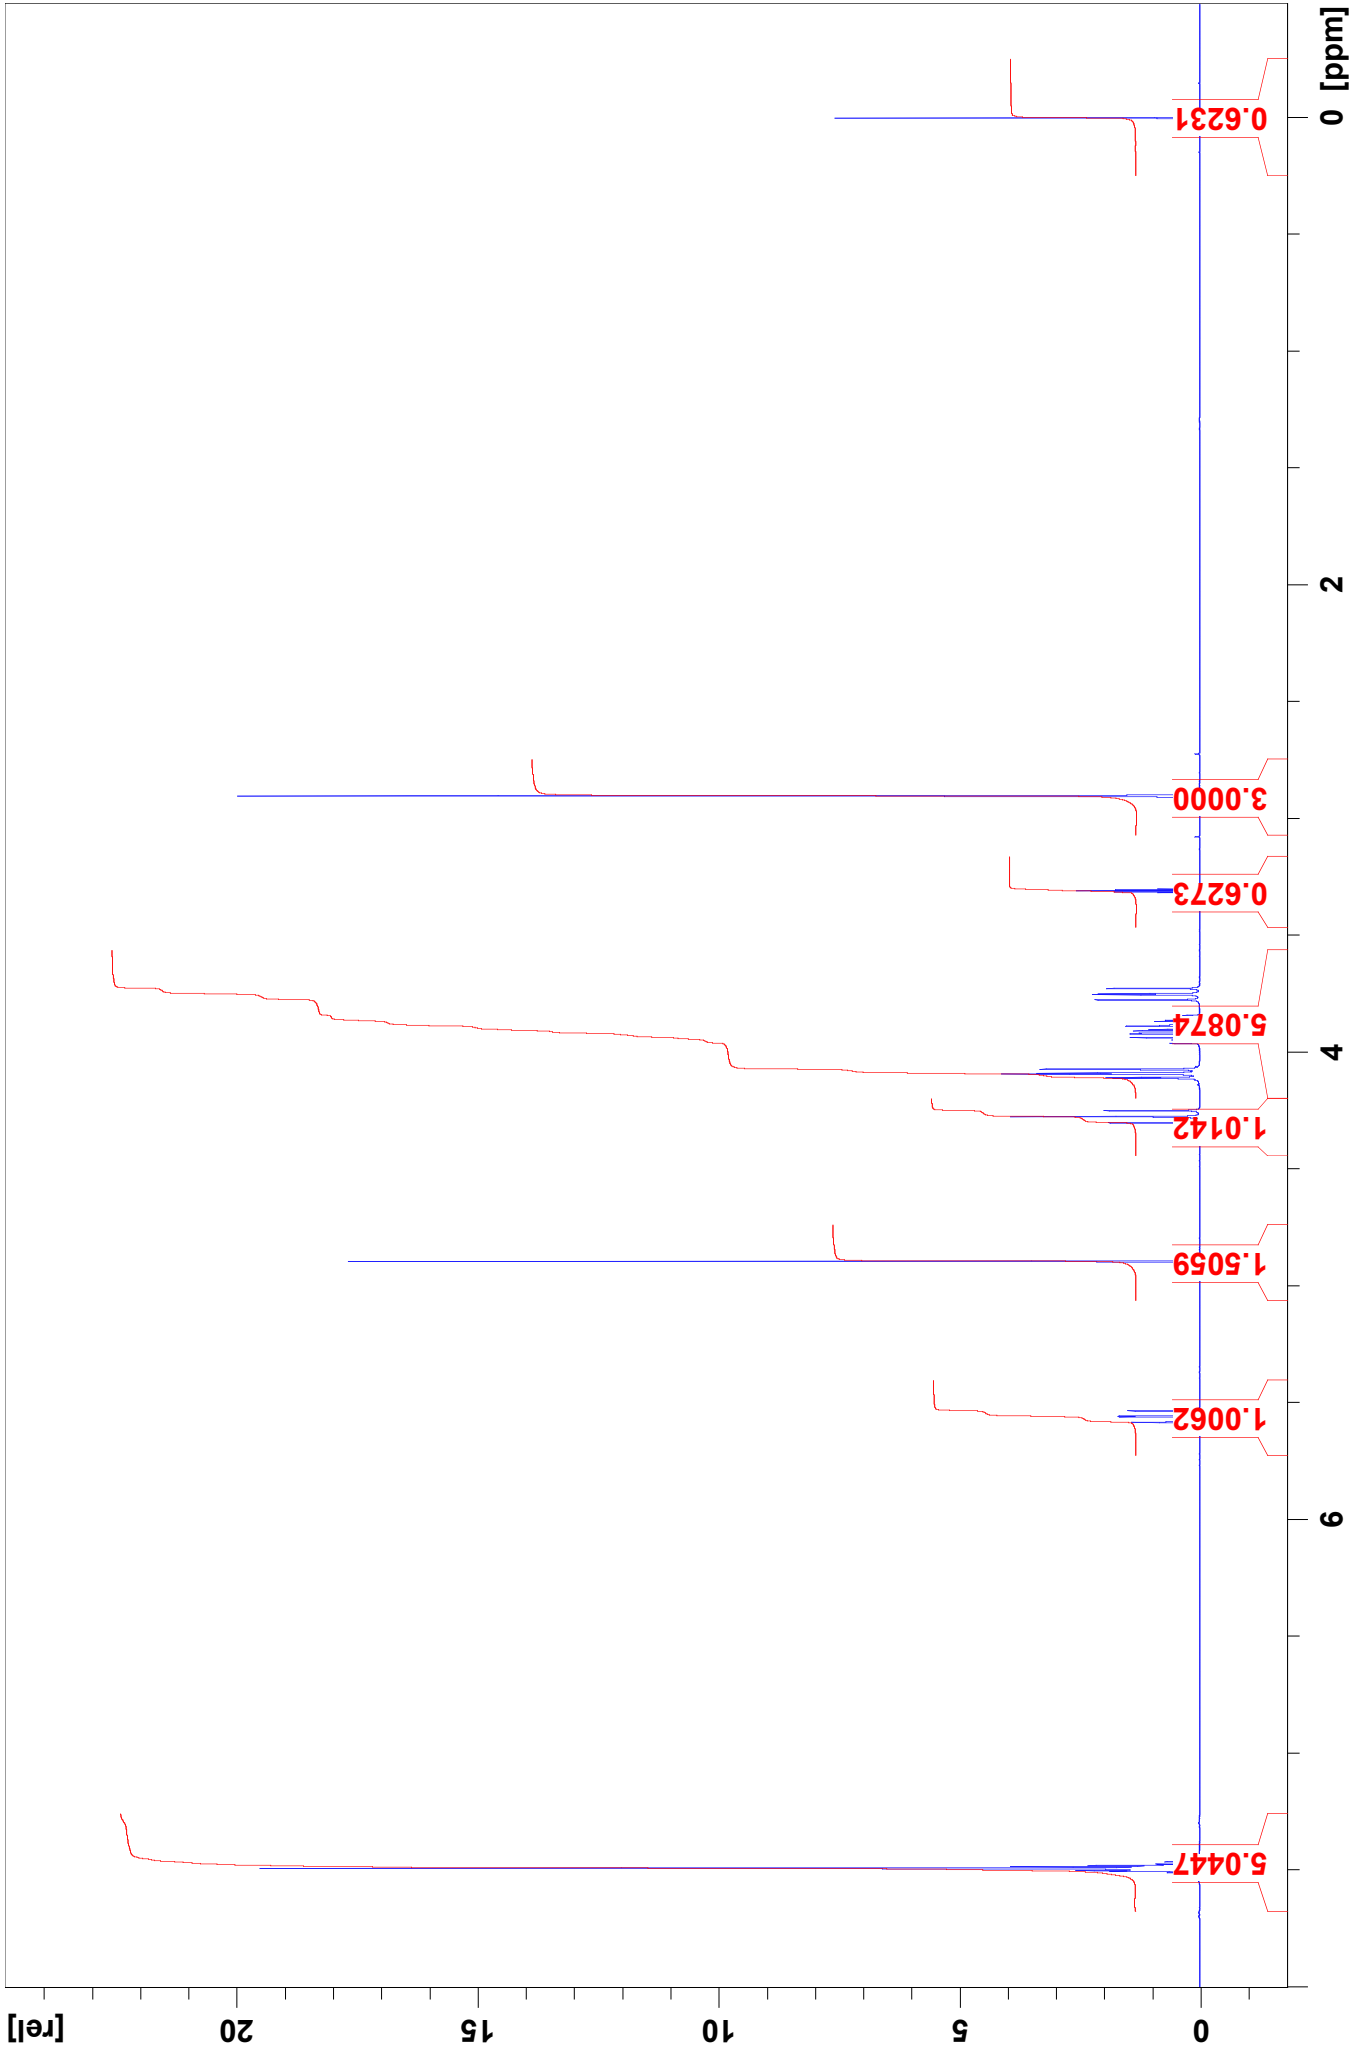

anh.250107 5 1 d: dan

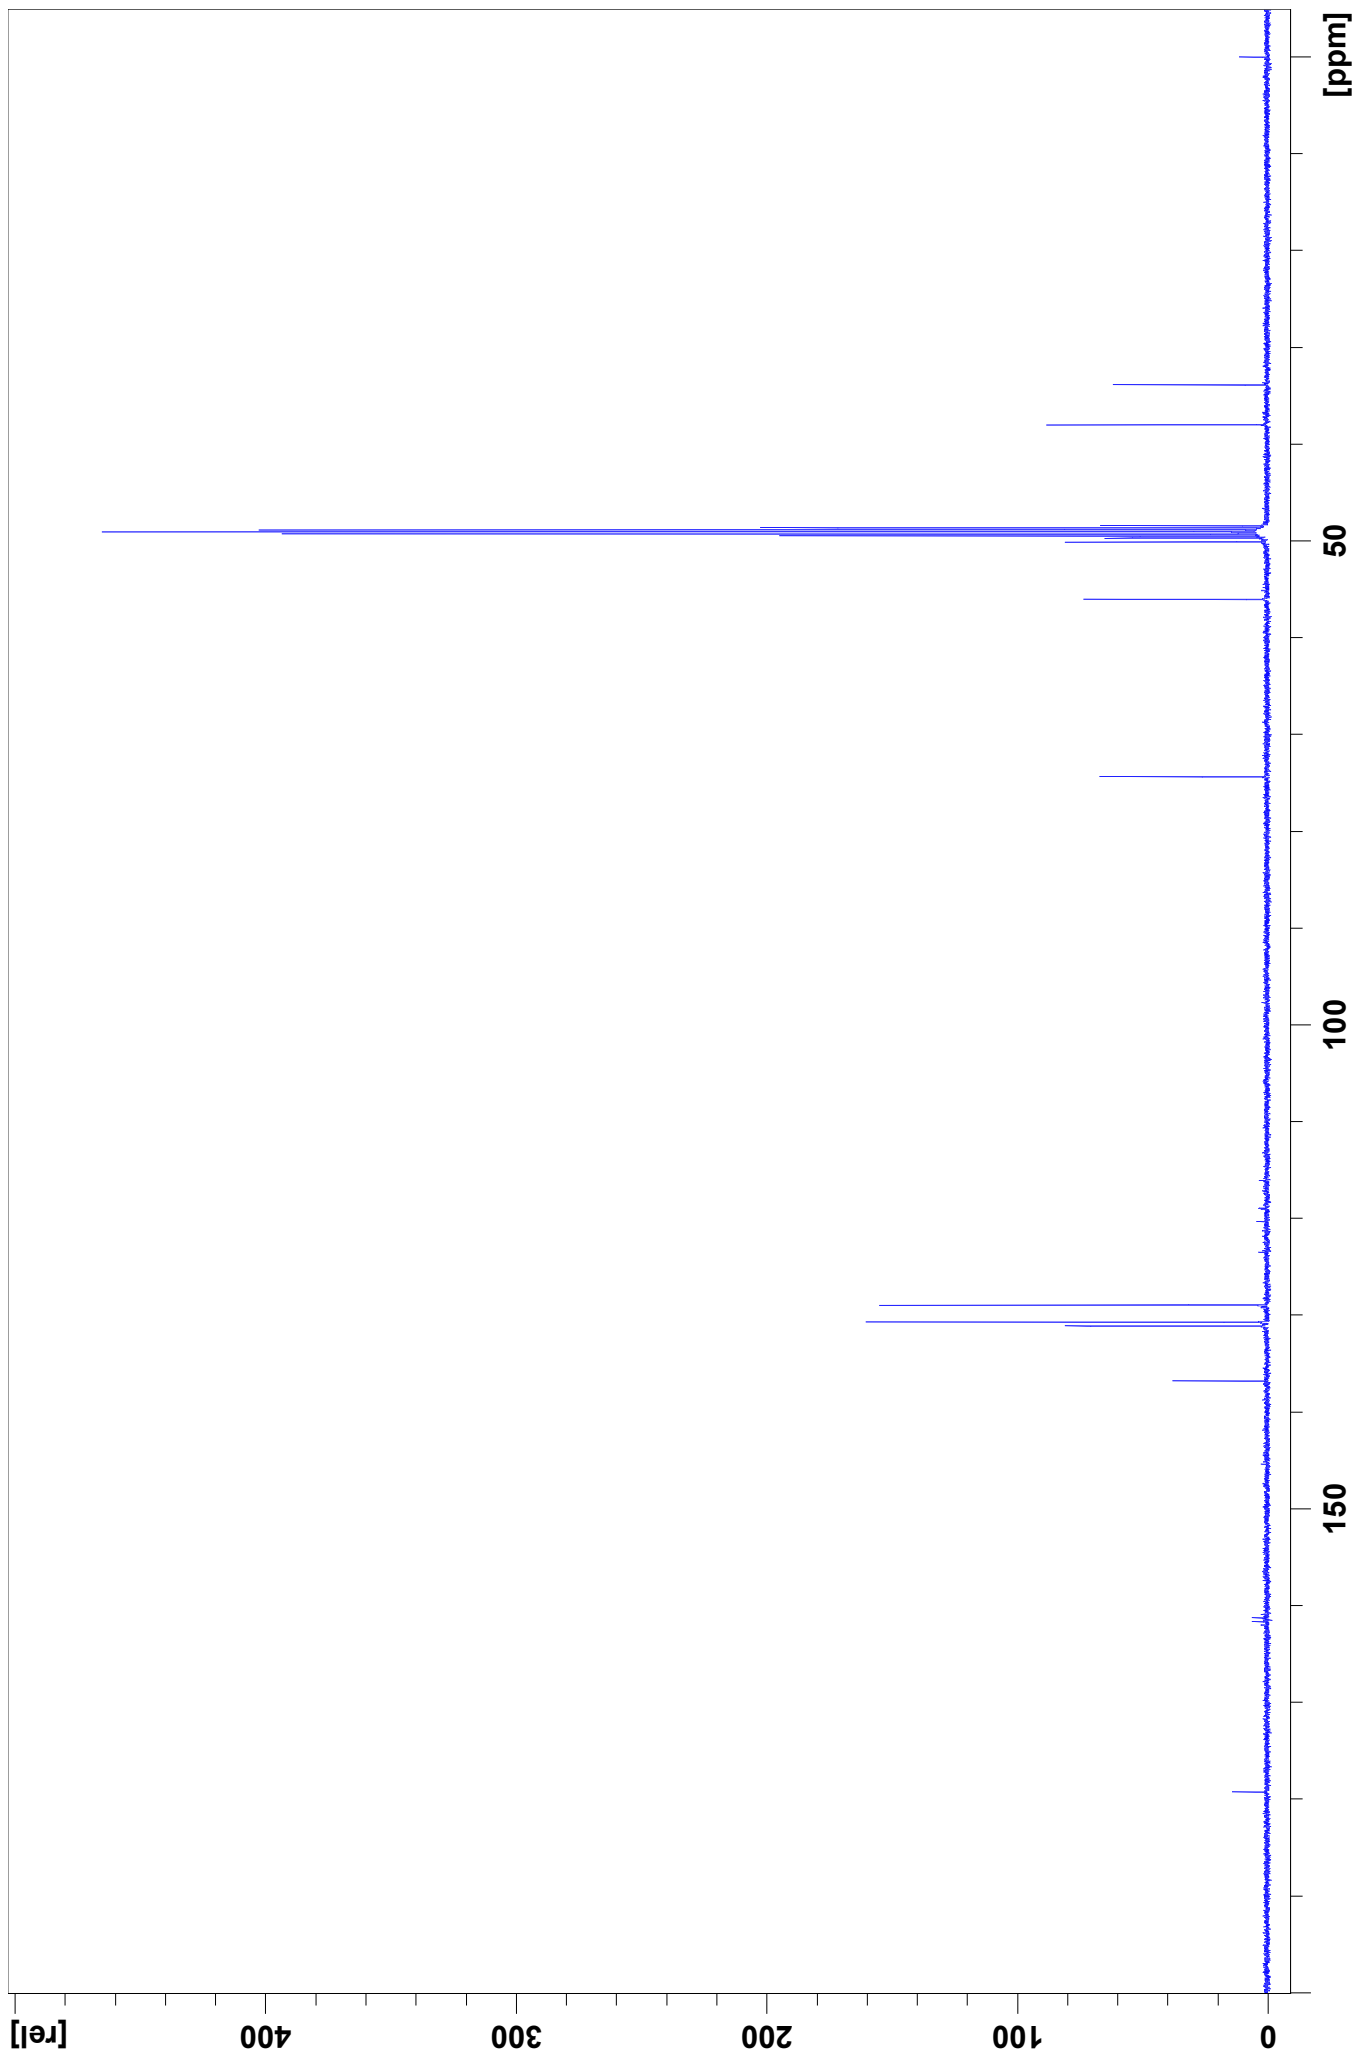

anh.250107 6 1 d: dan

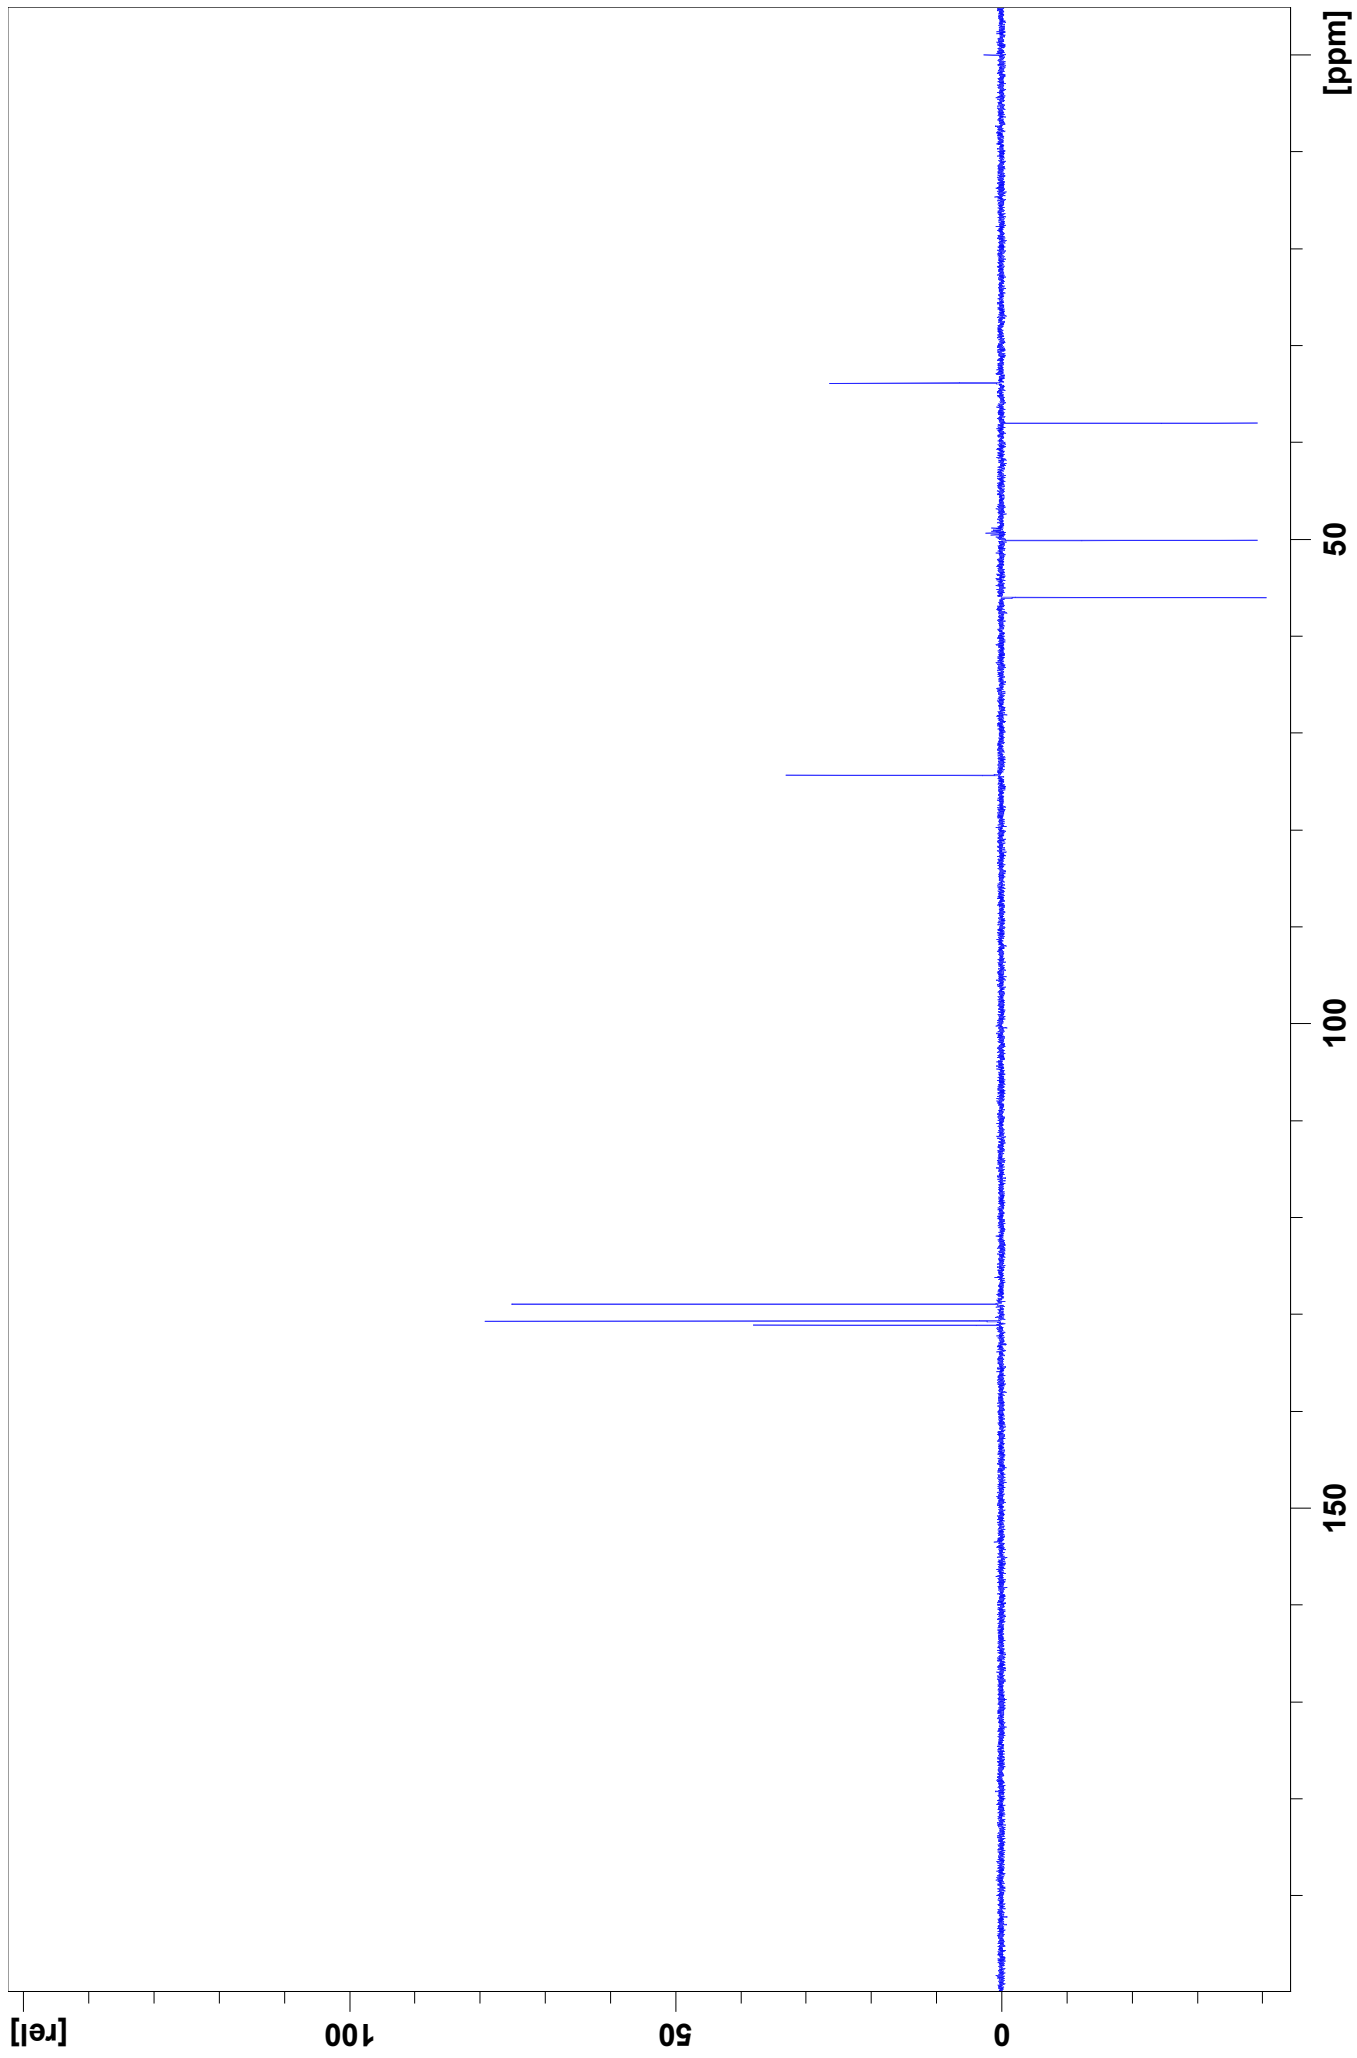

anh.150107 1 1 d: dan

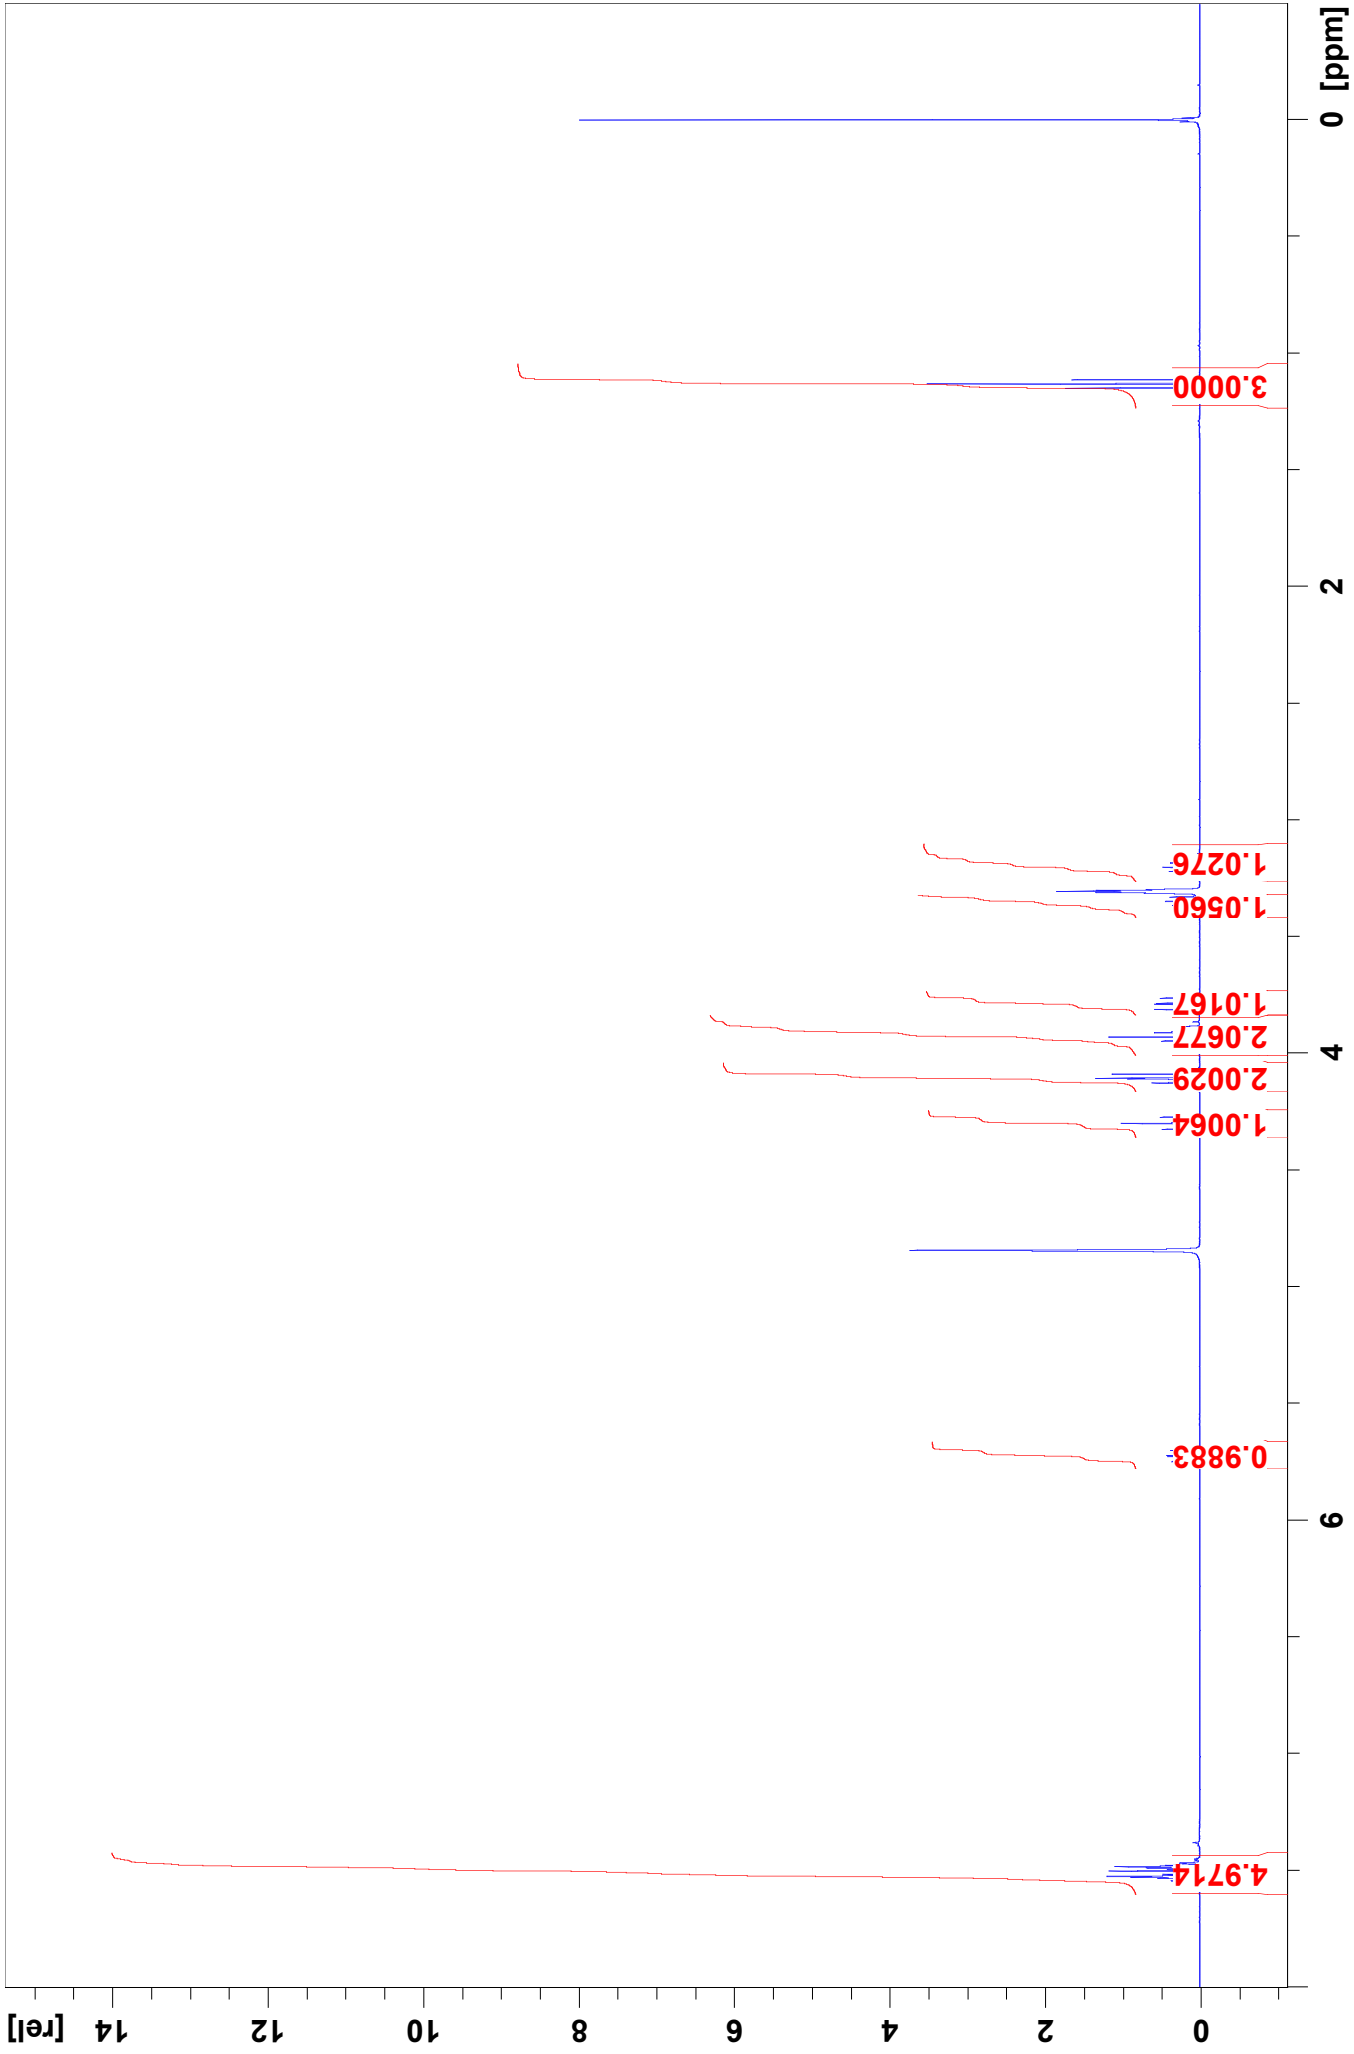



anh.150107 2 1 d: dan

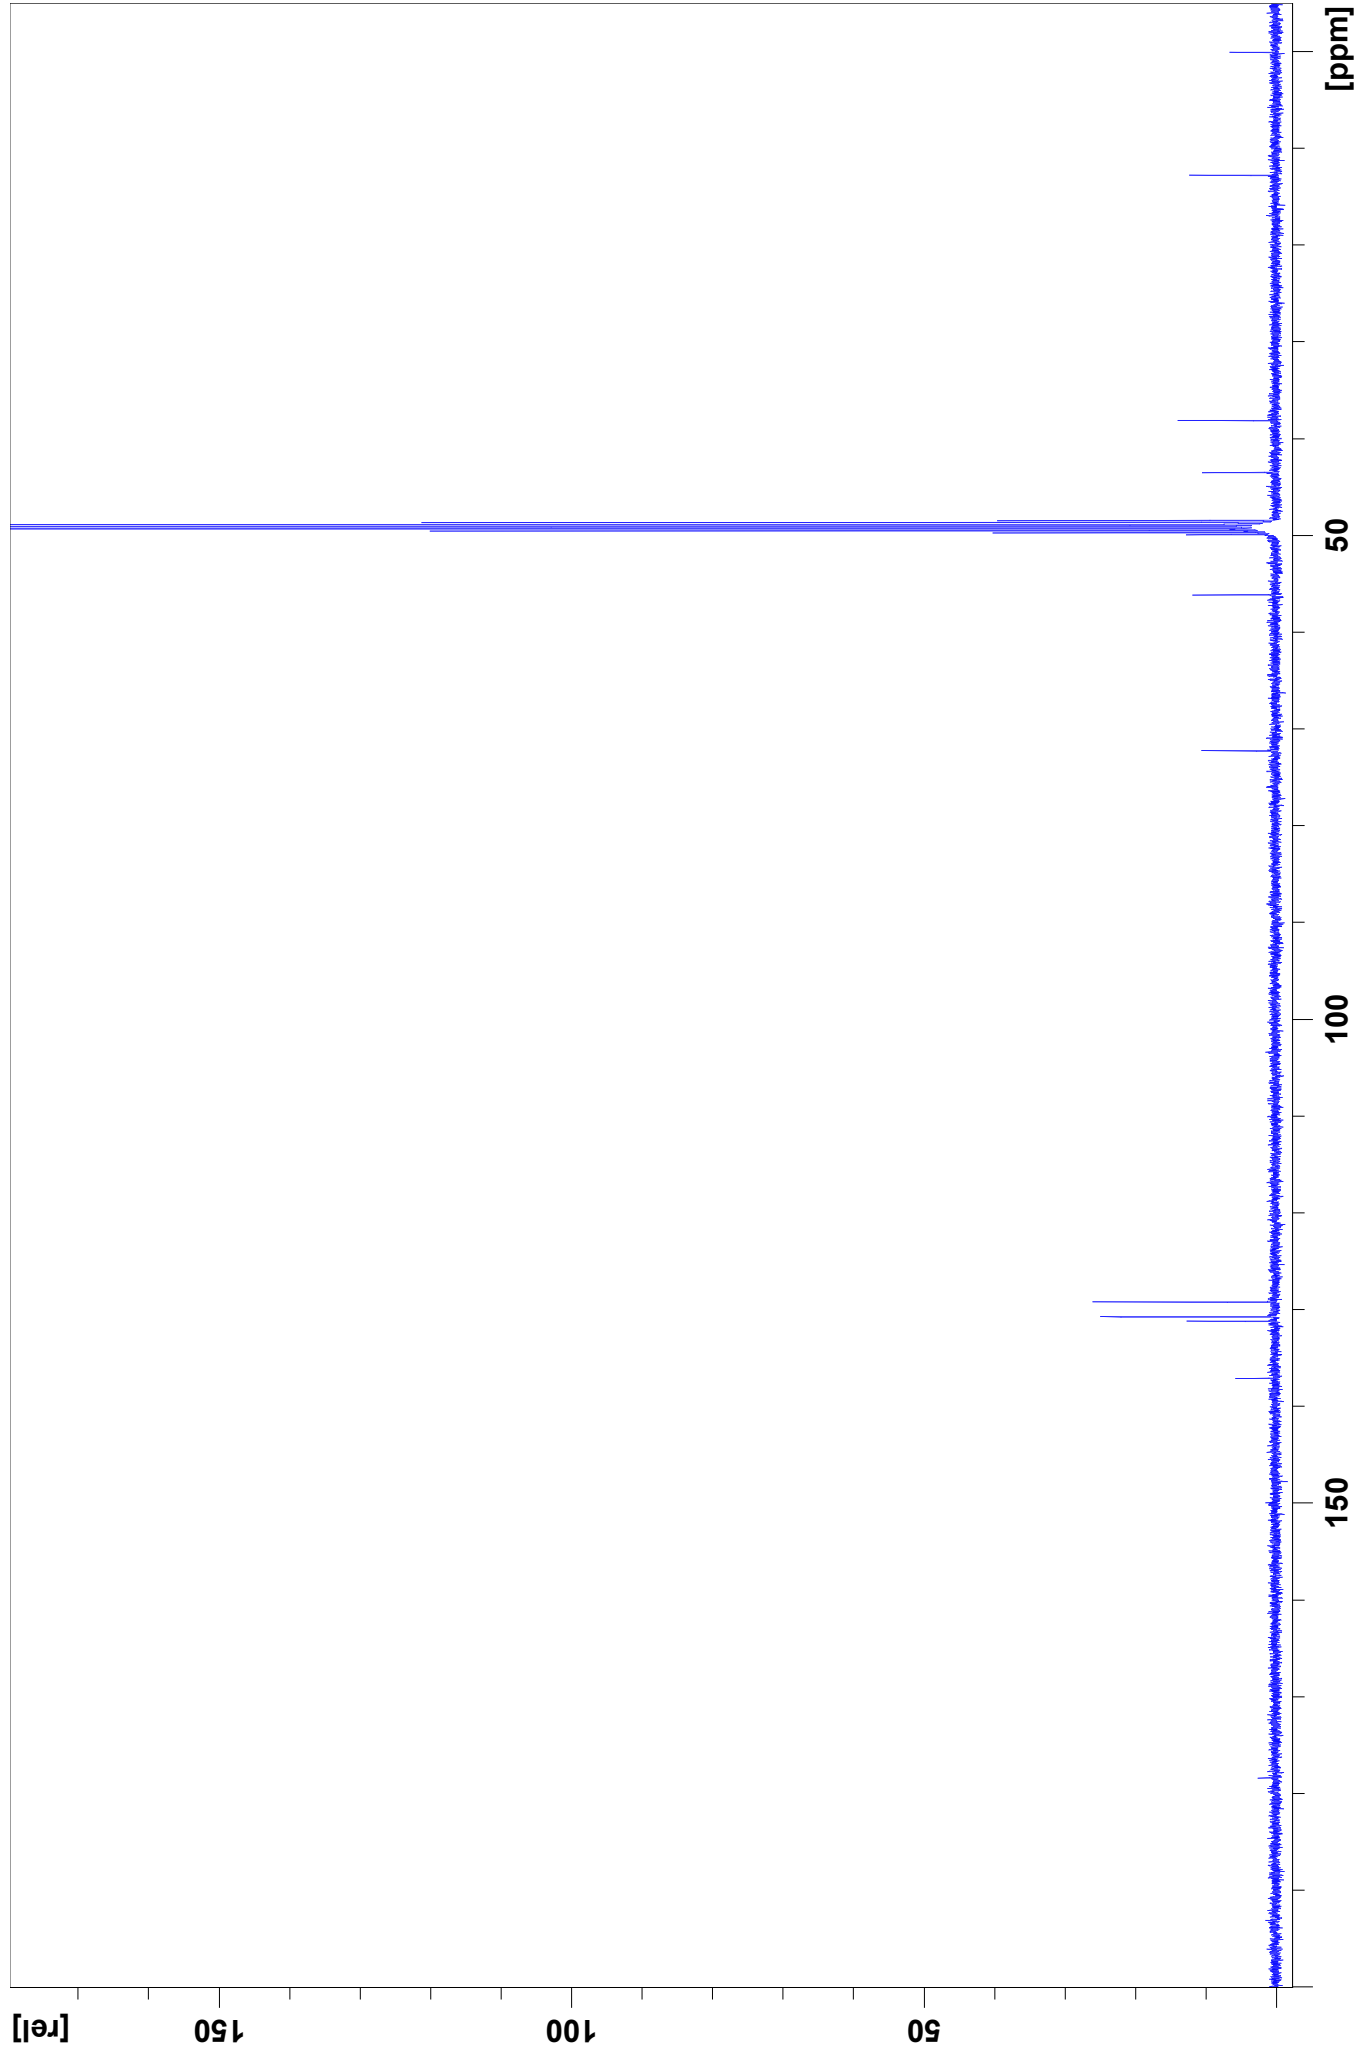

anh.150107 3 1 d: dan

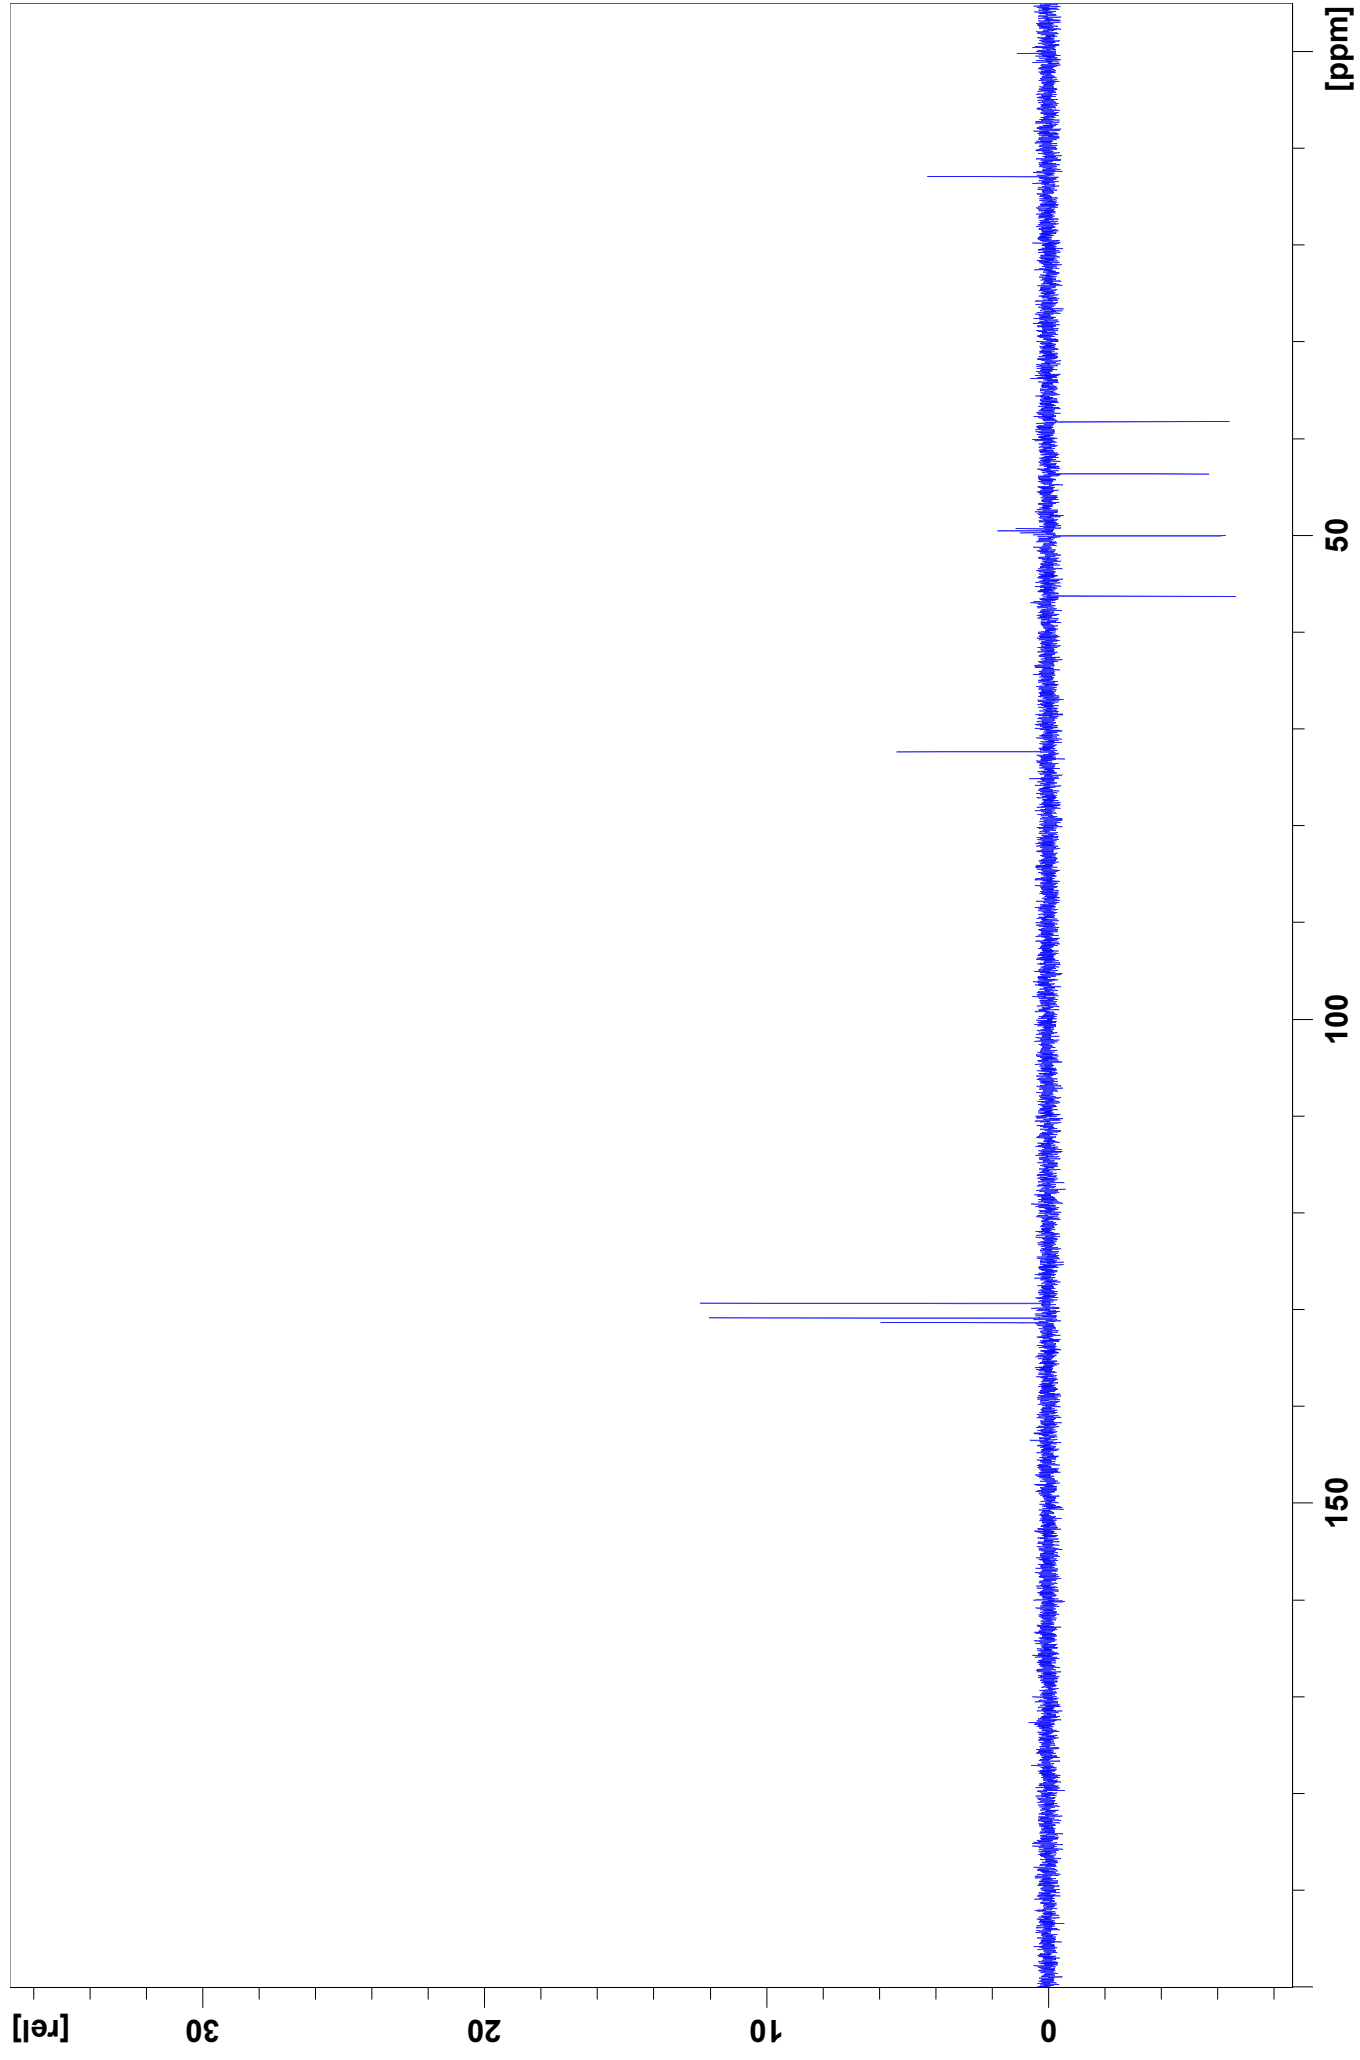

anh.250107 1 1 d: dan

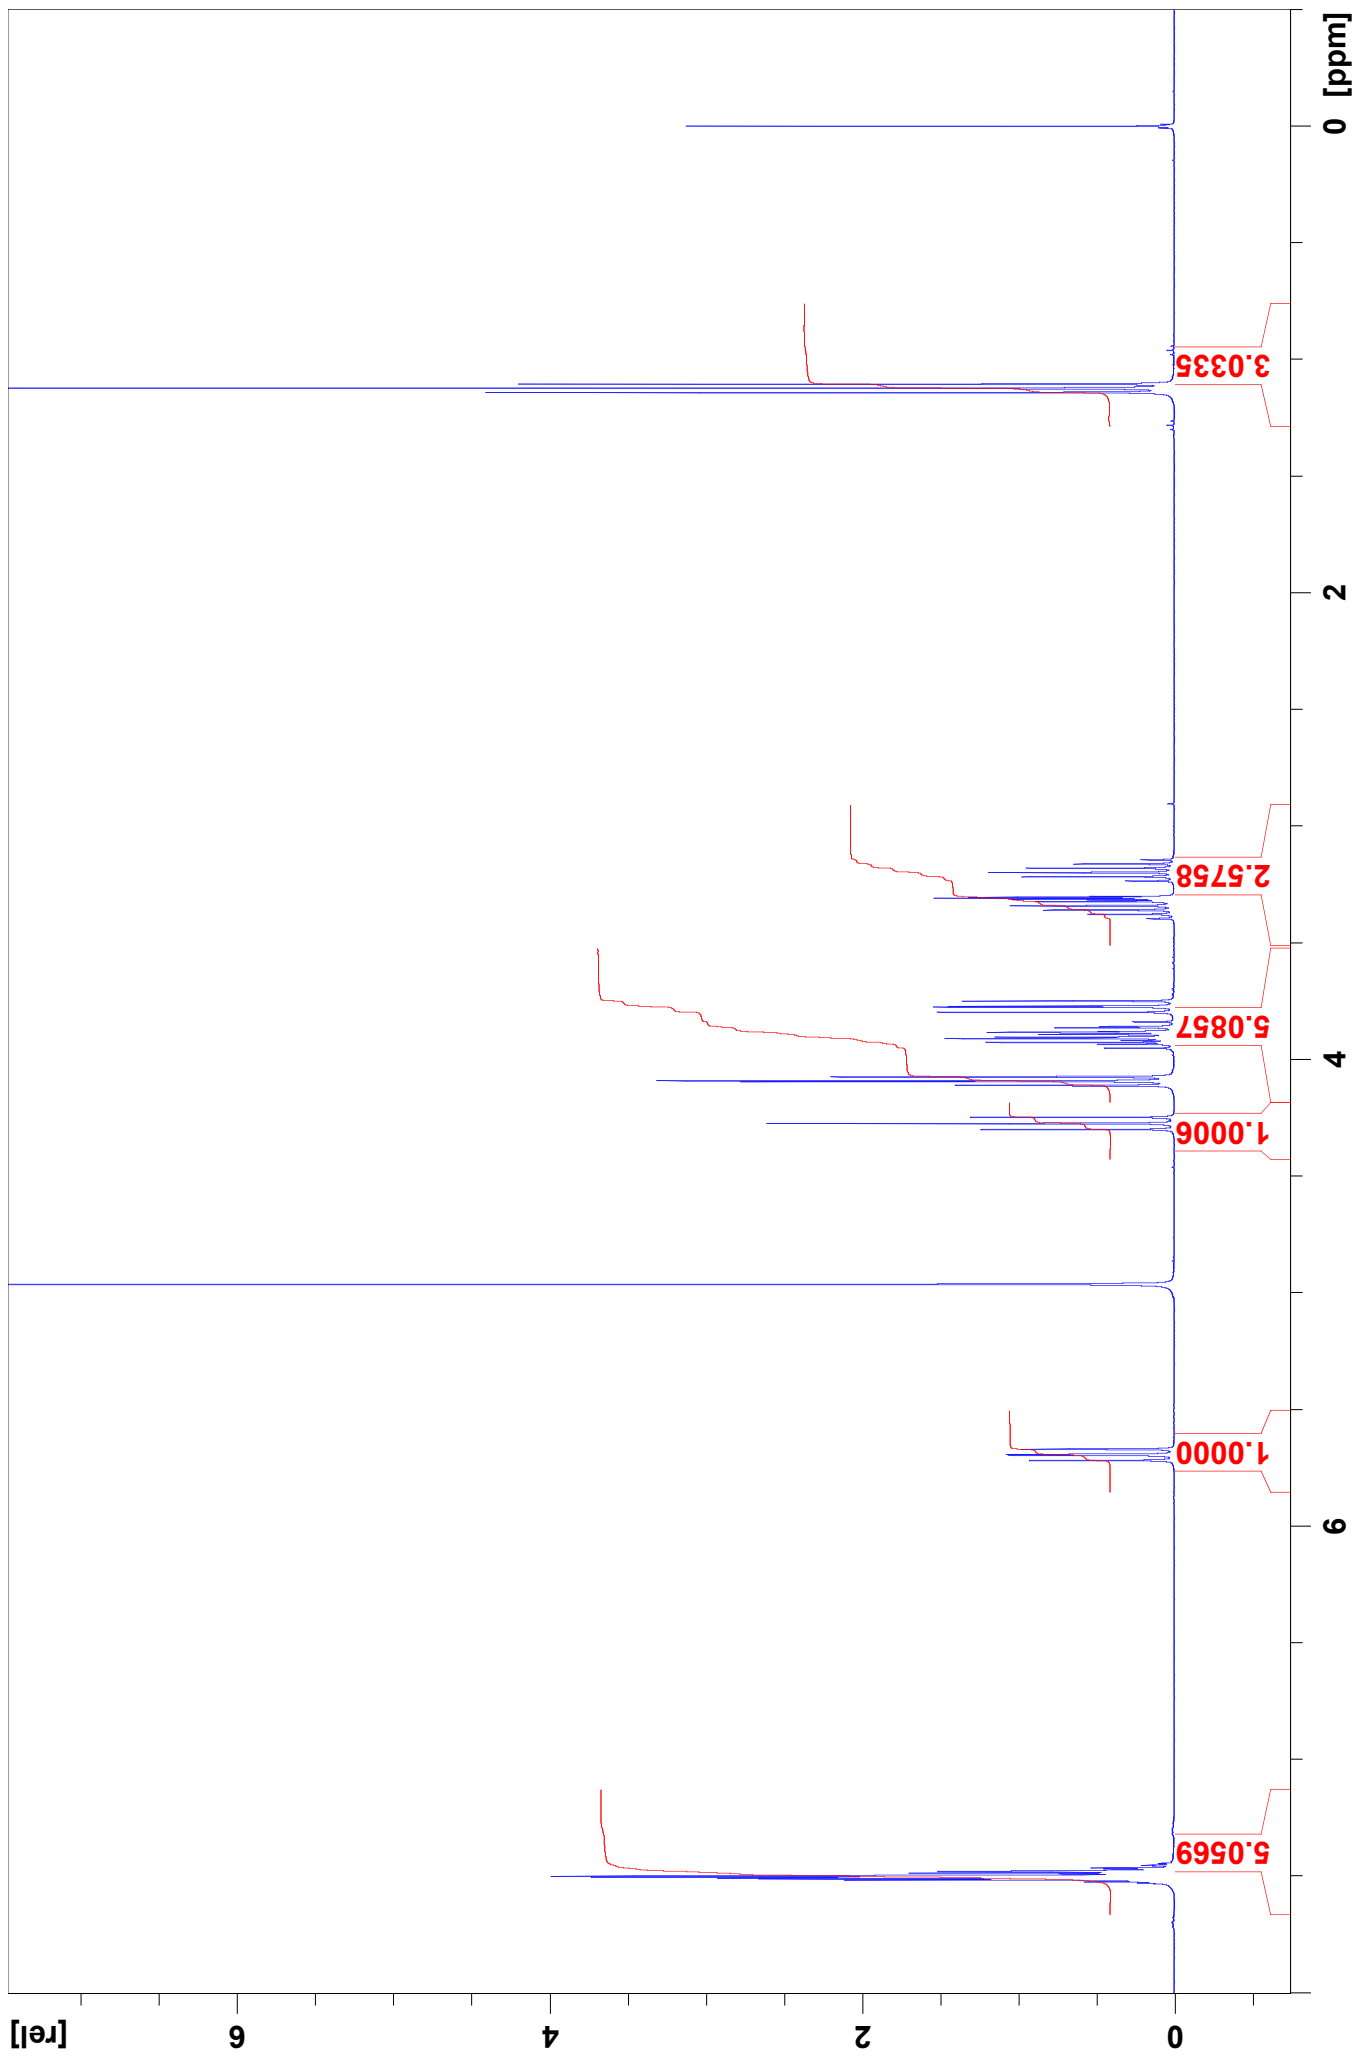

anh.250107 2 1 d: dan

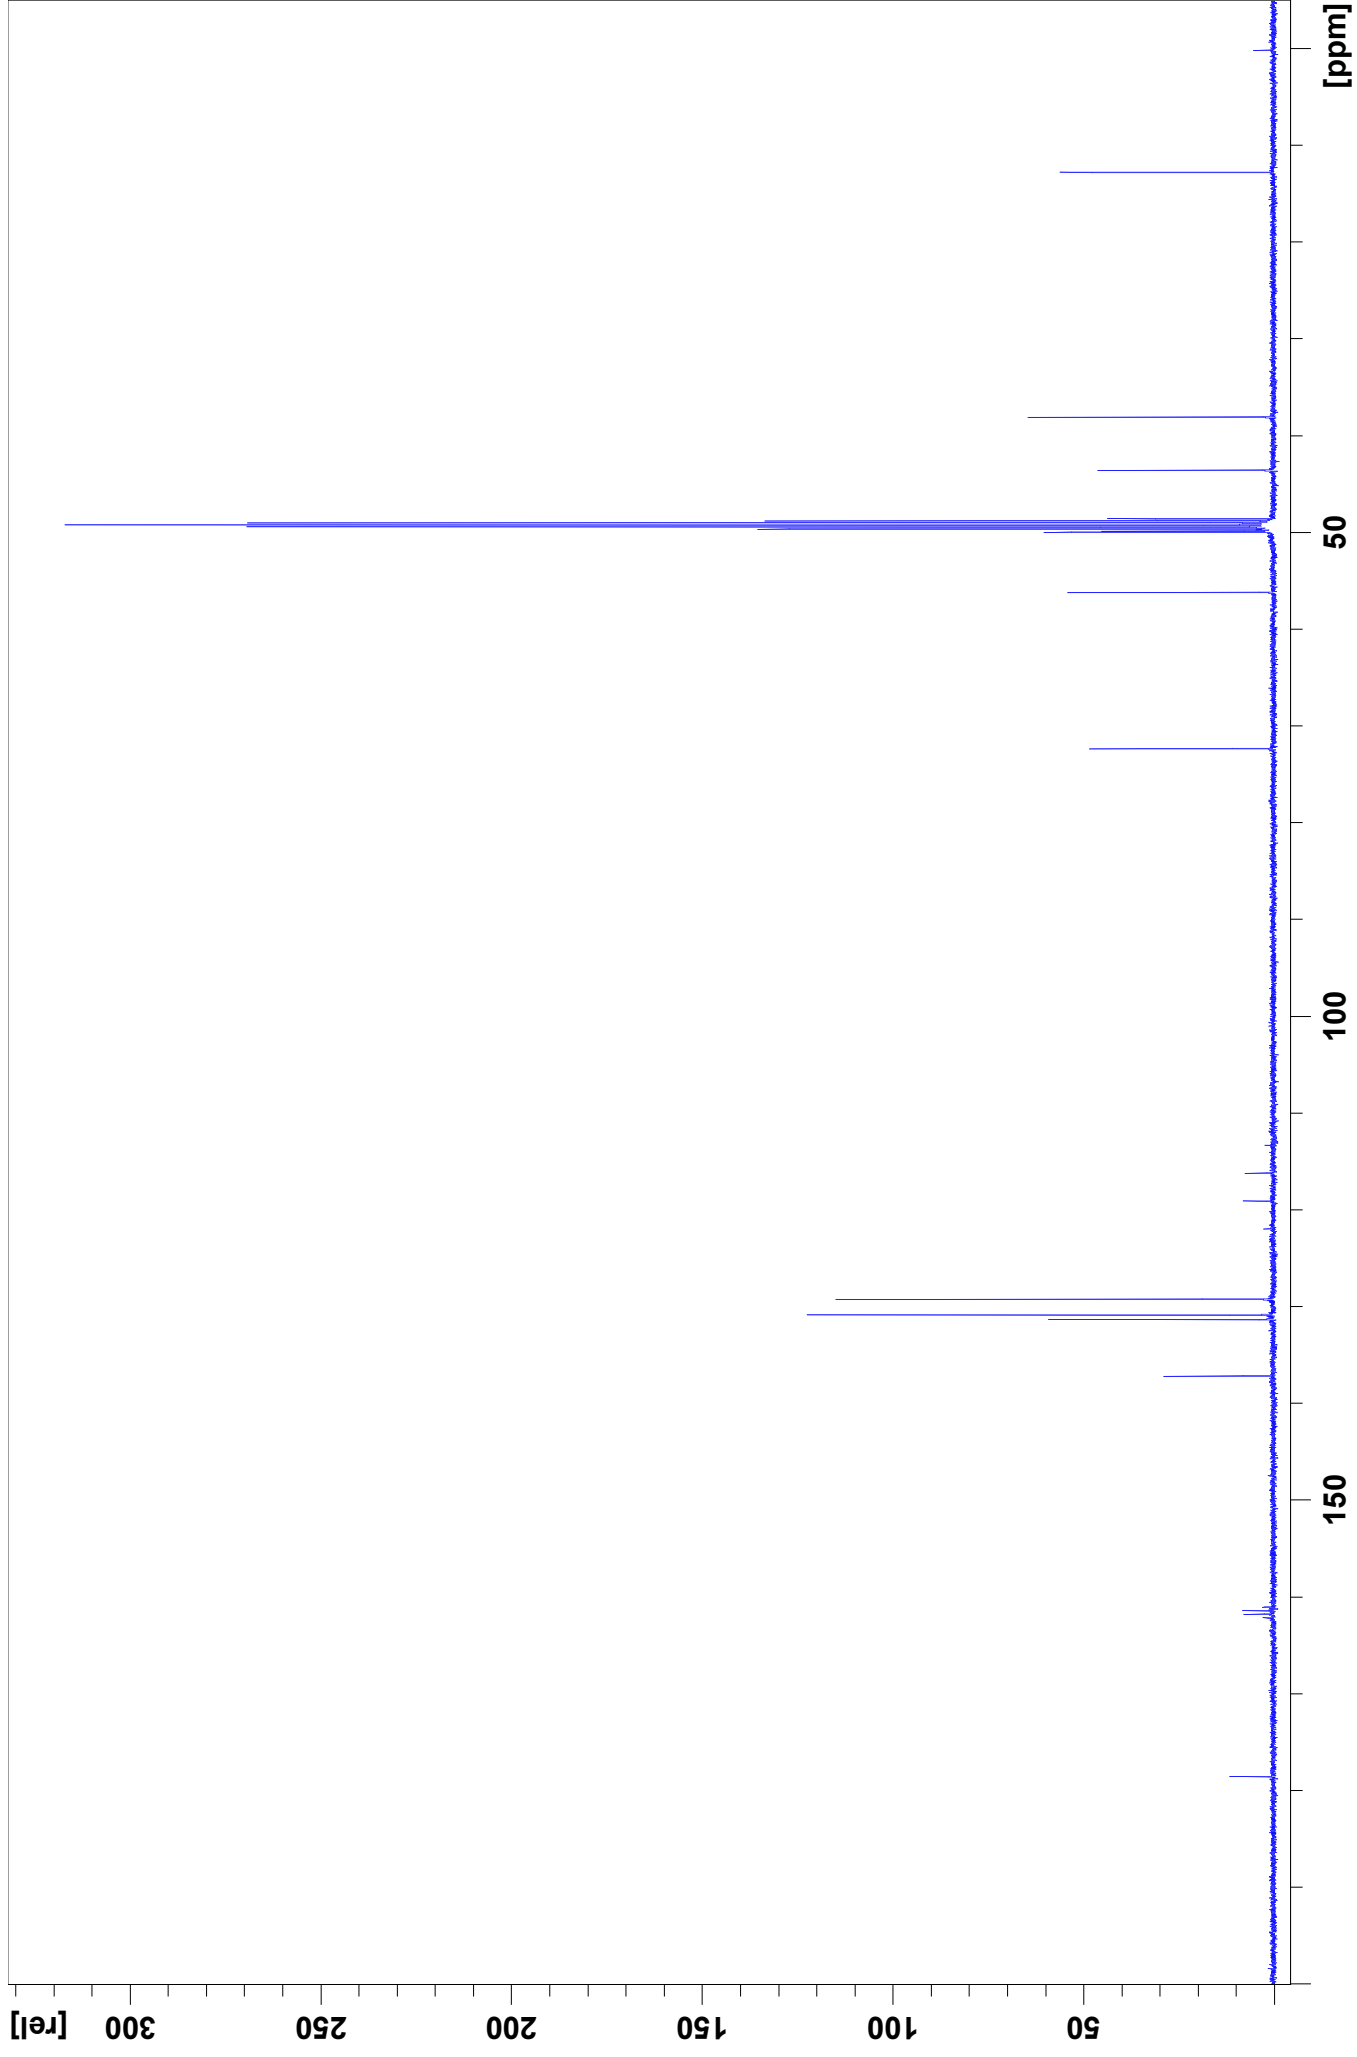

anh.250107 3 1 d: dan

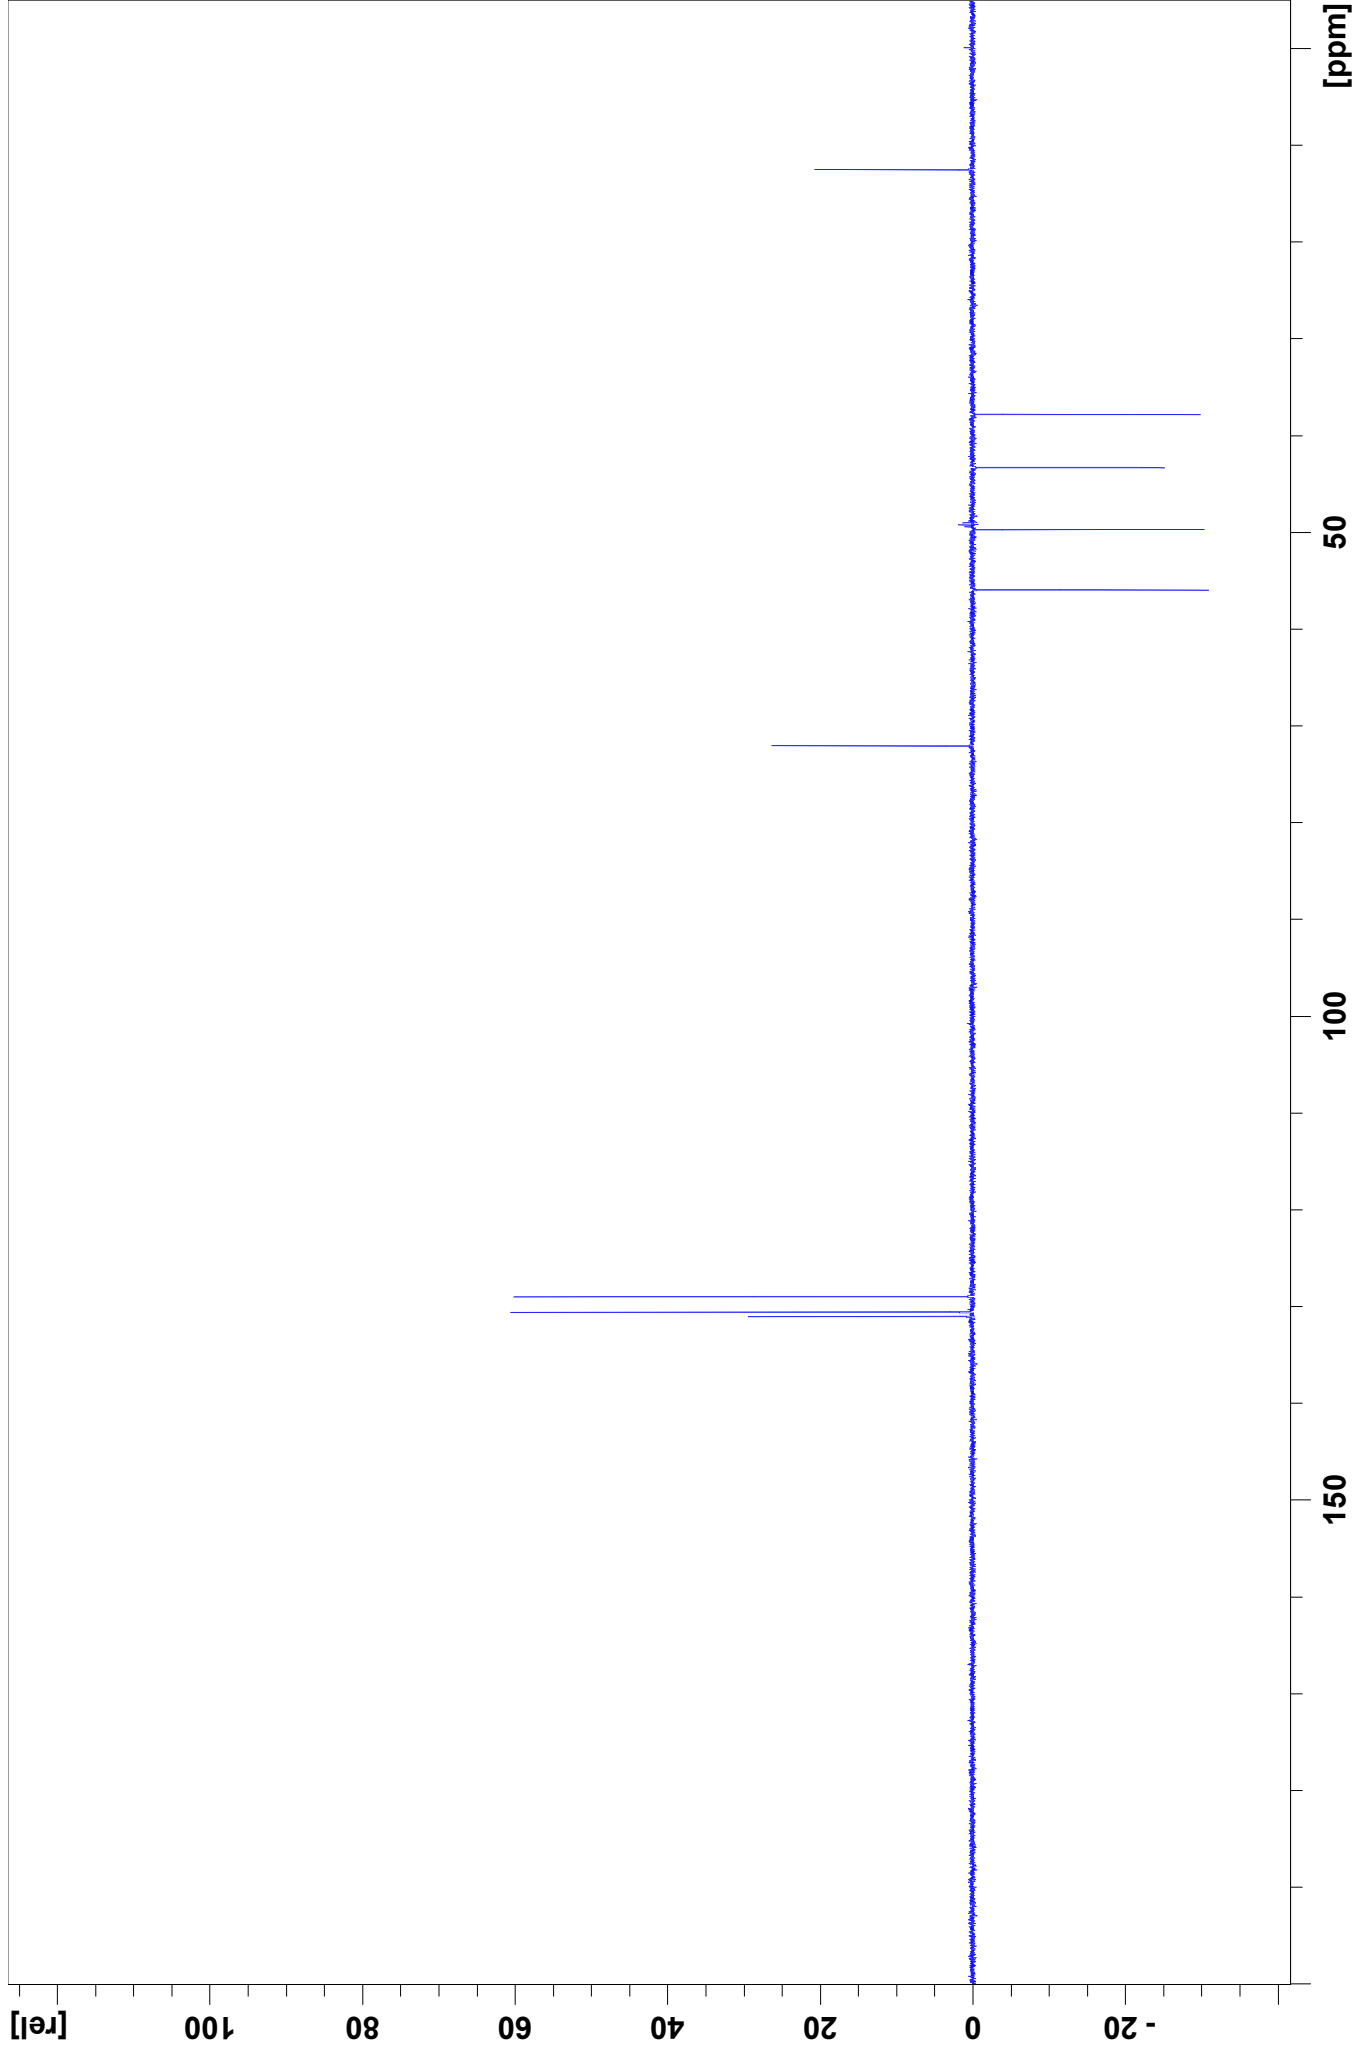

anh.240107 1 1 d: dan

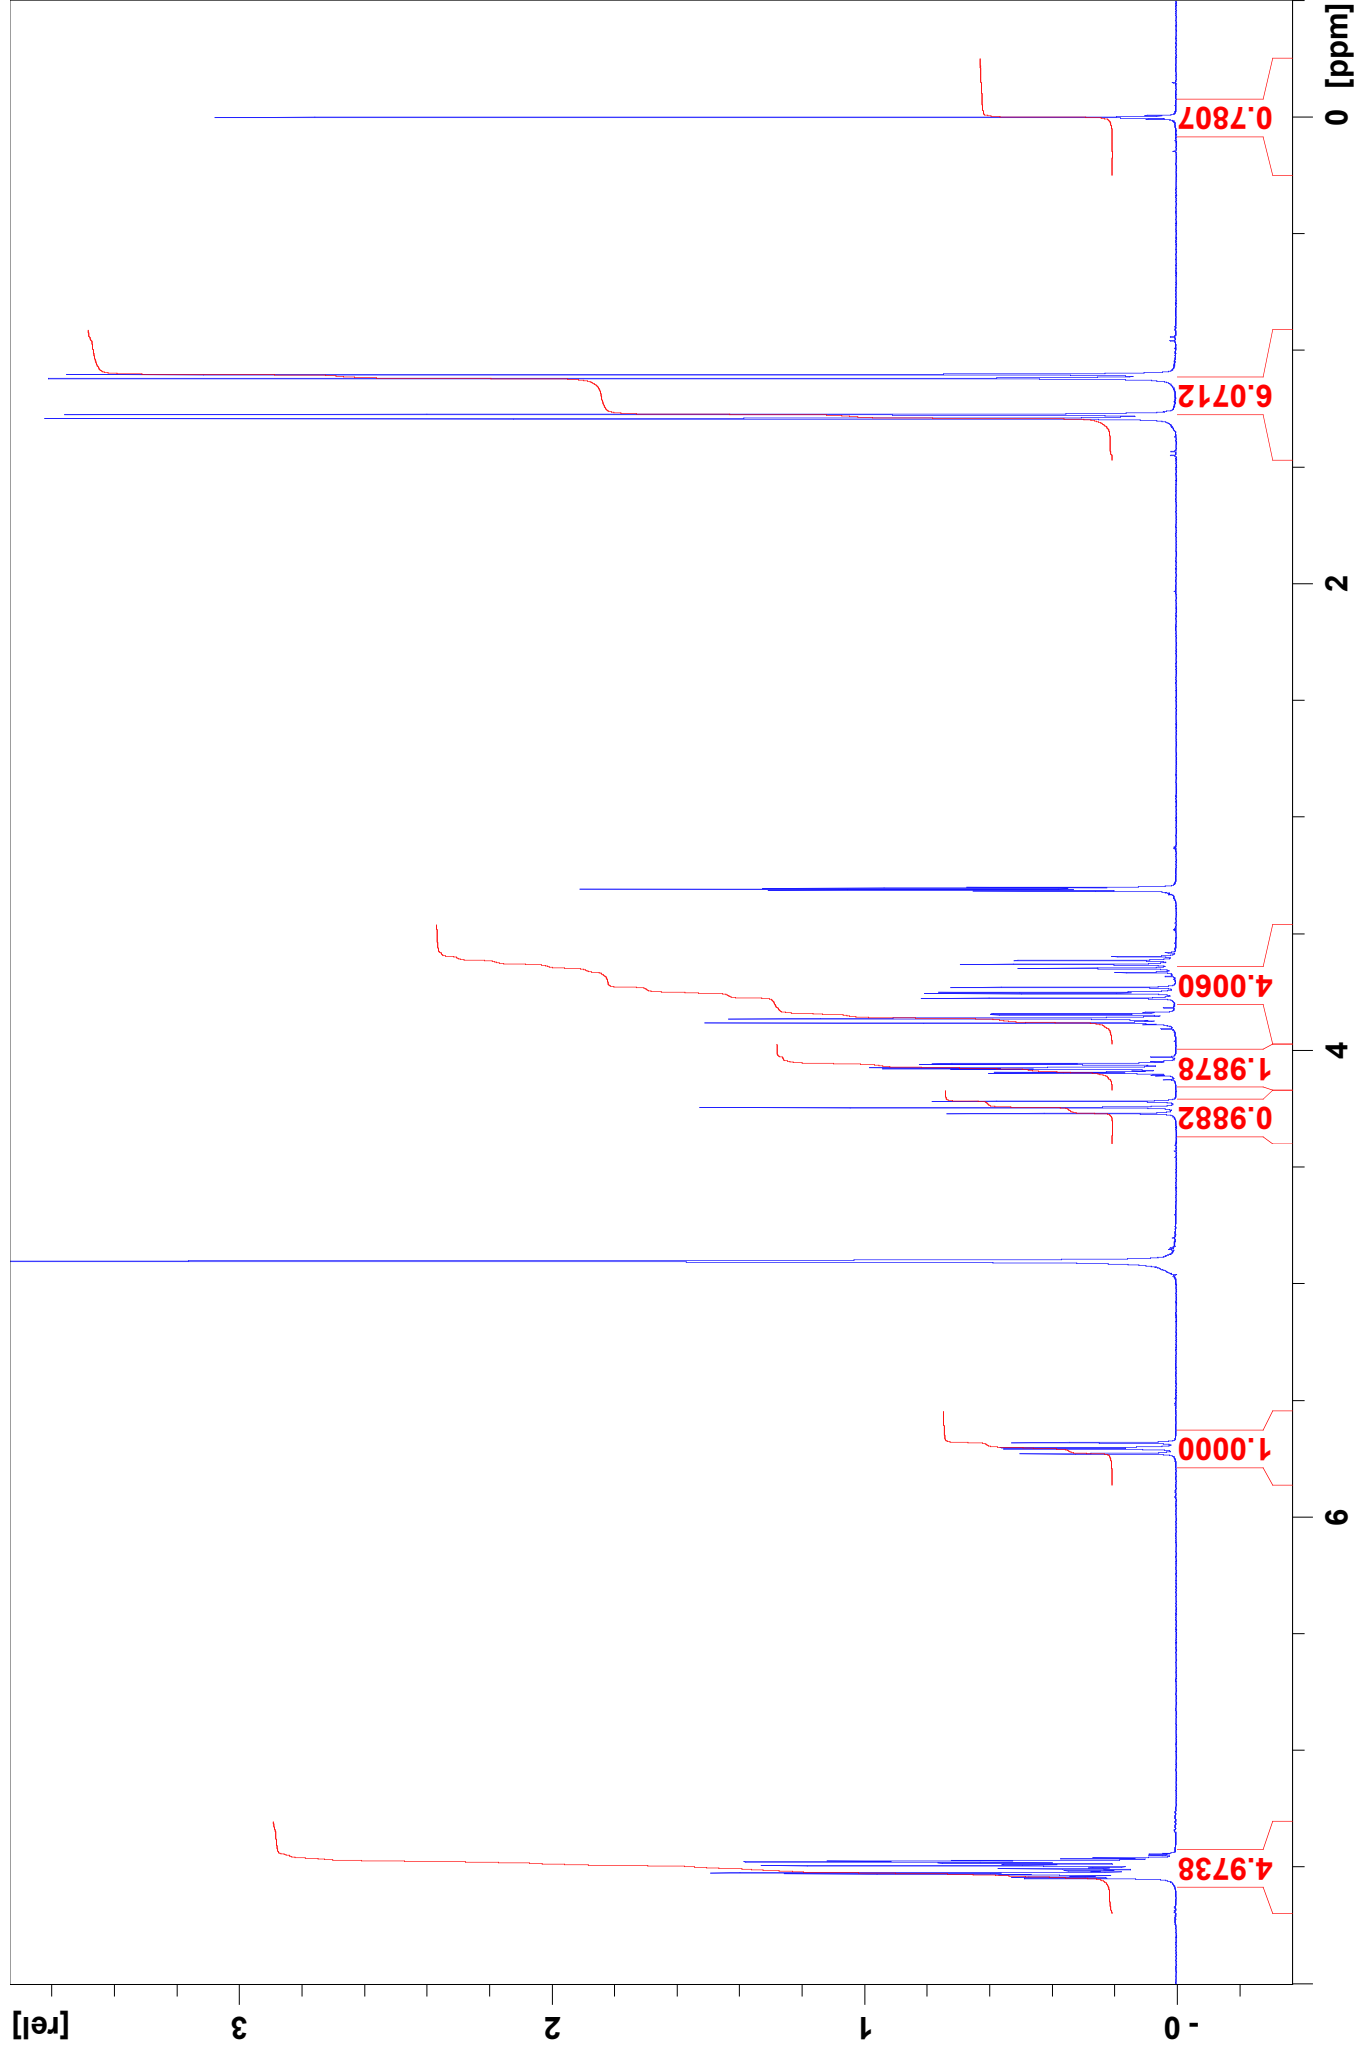

anh.240107 2 1 d: dan

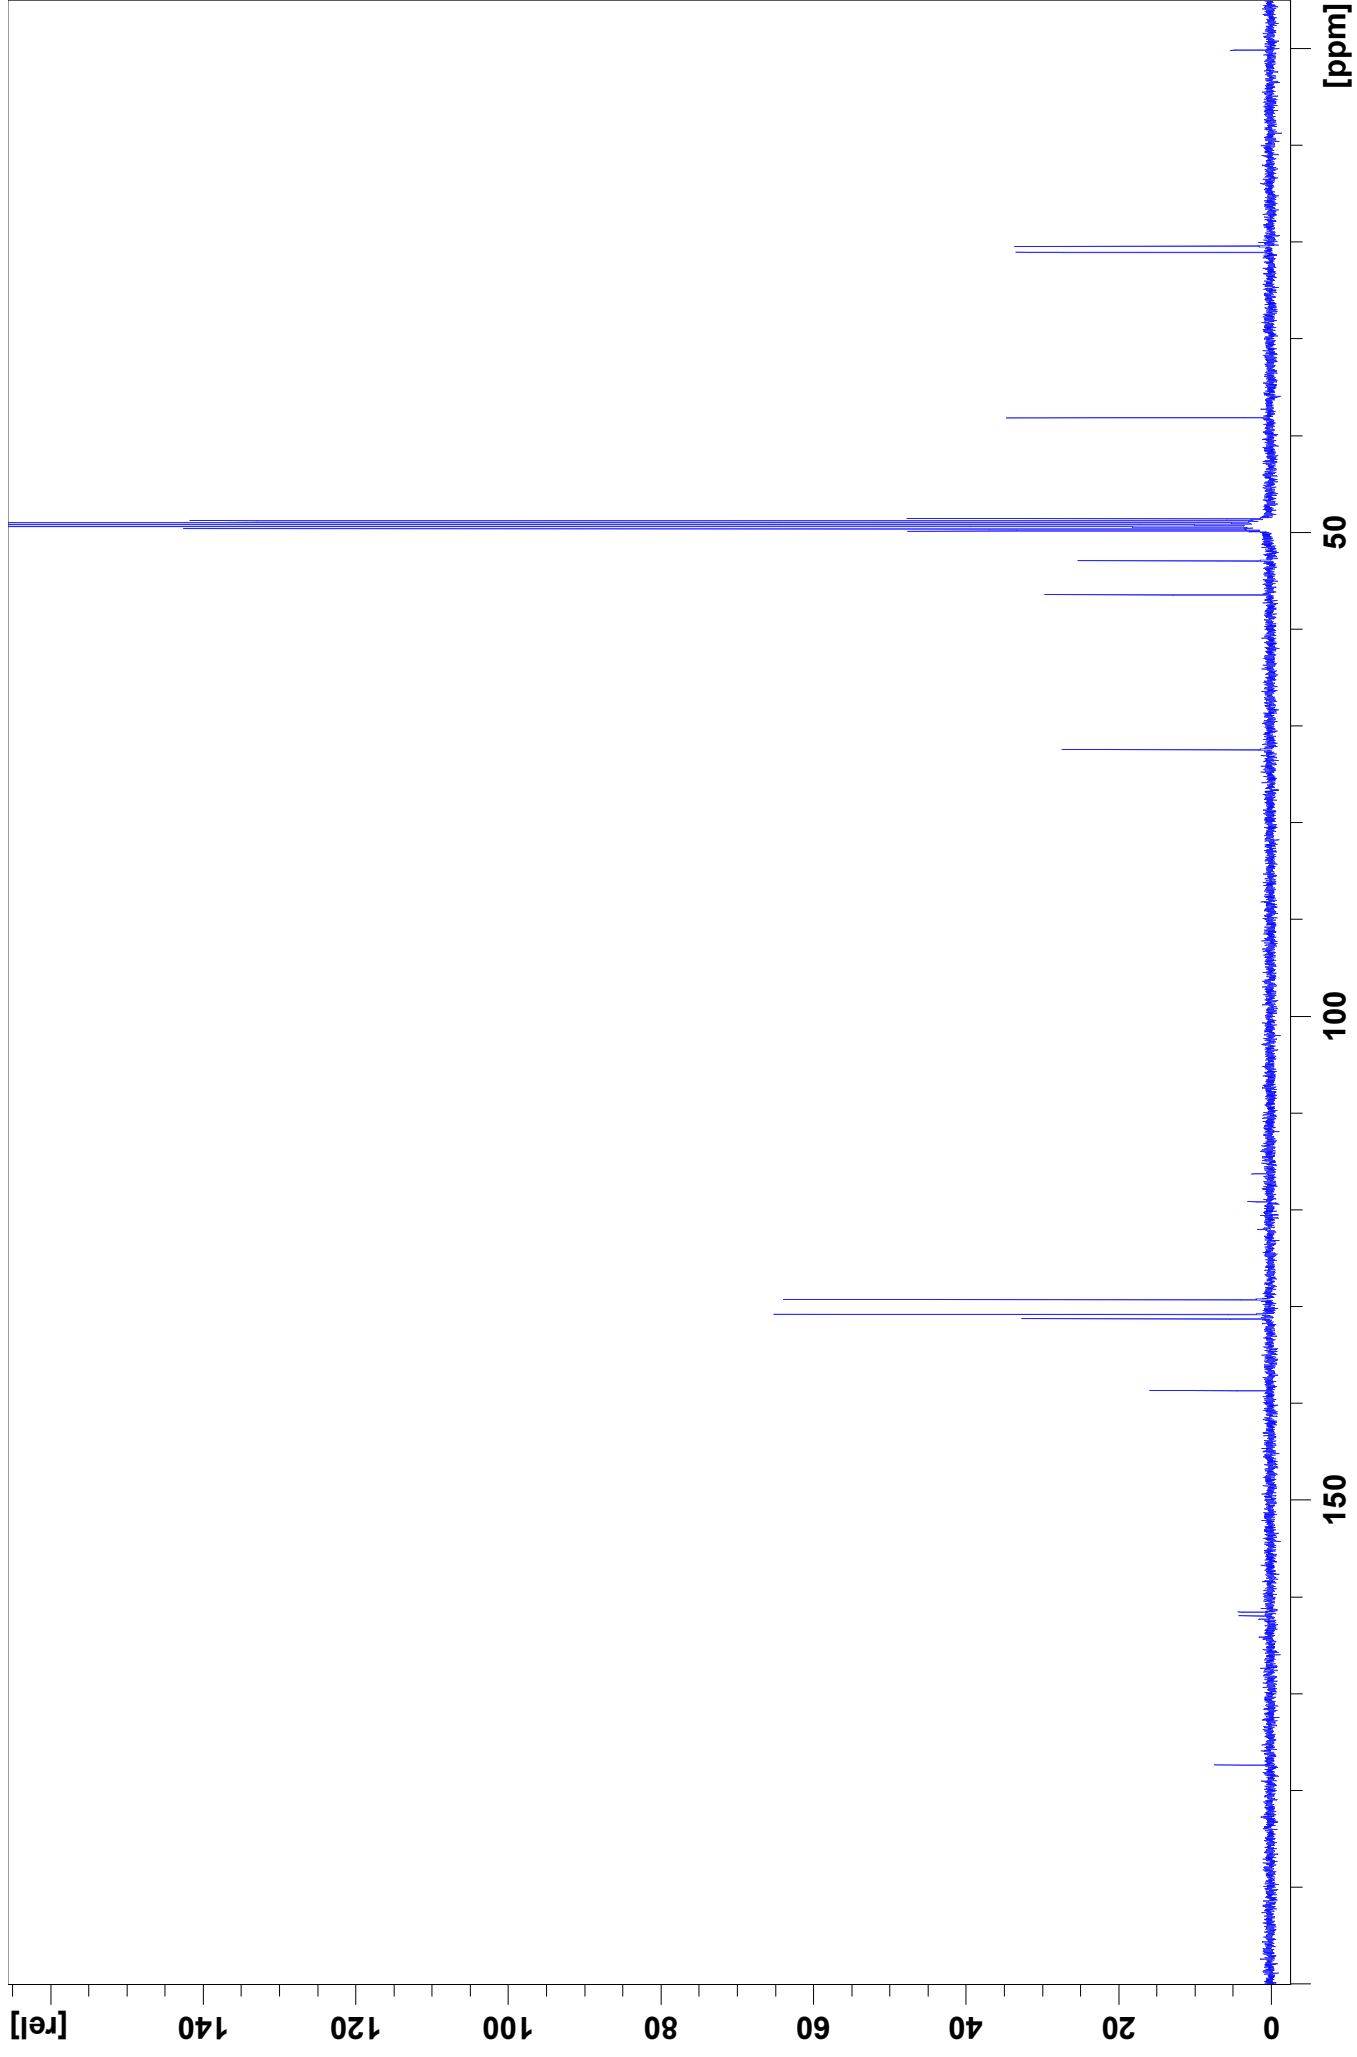

anh.240107 3 1 d: dan

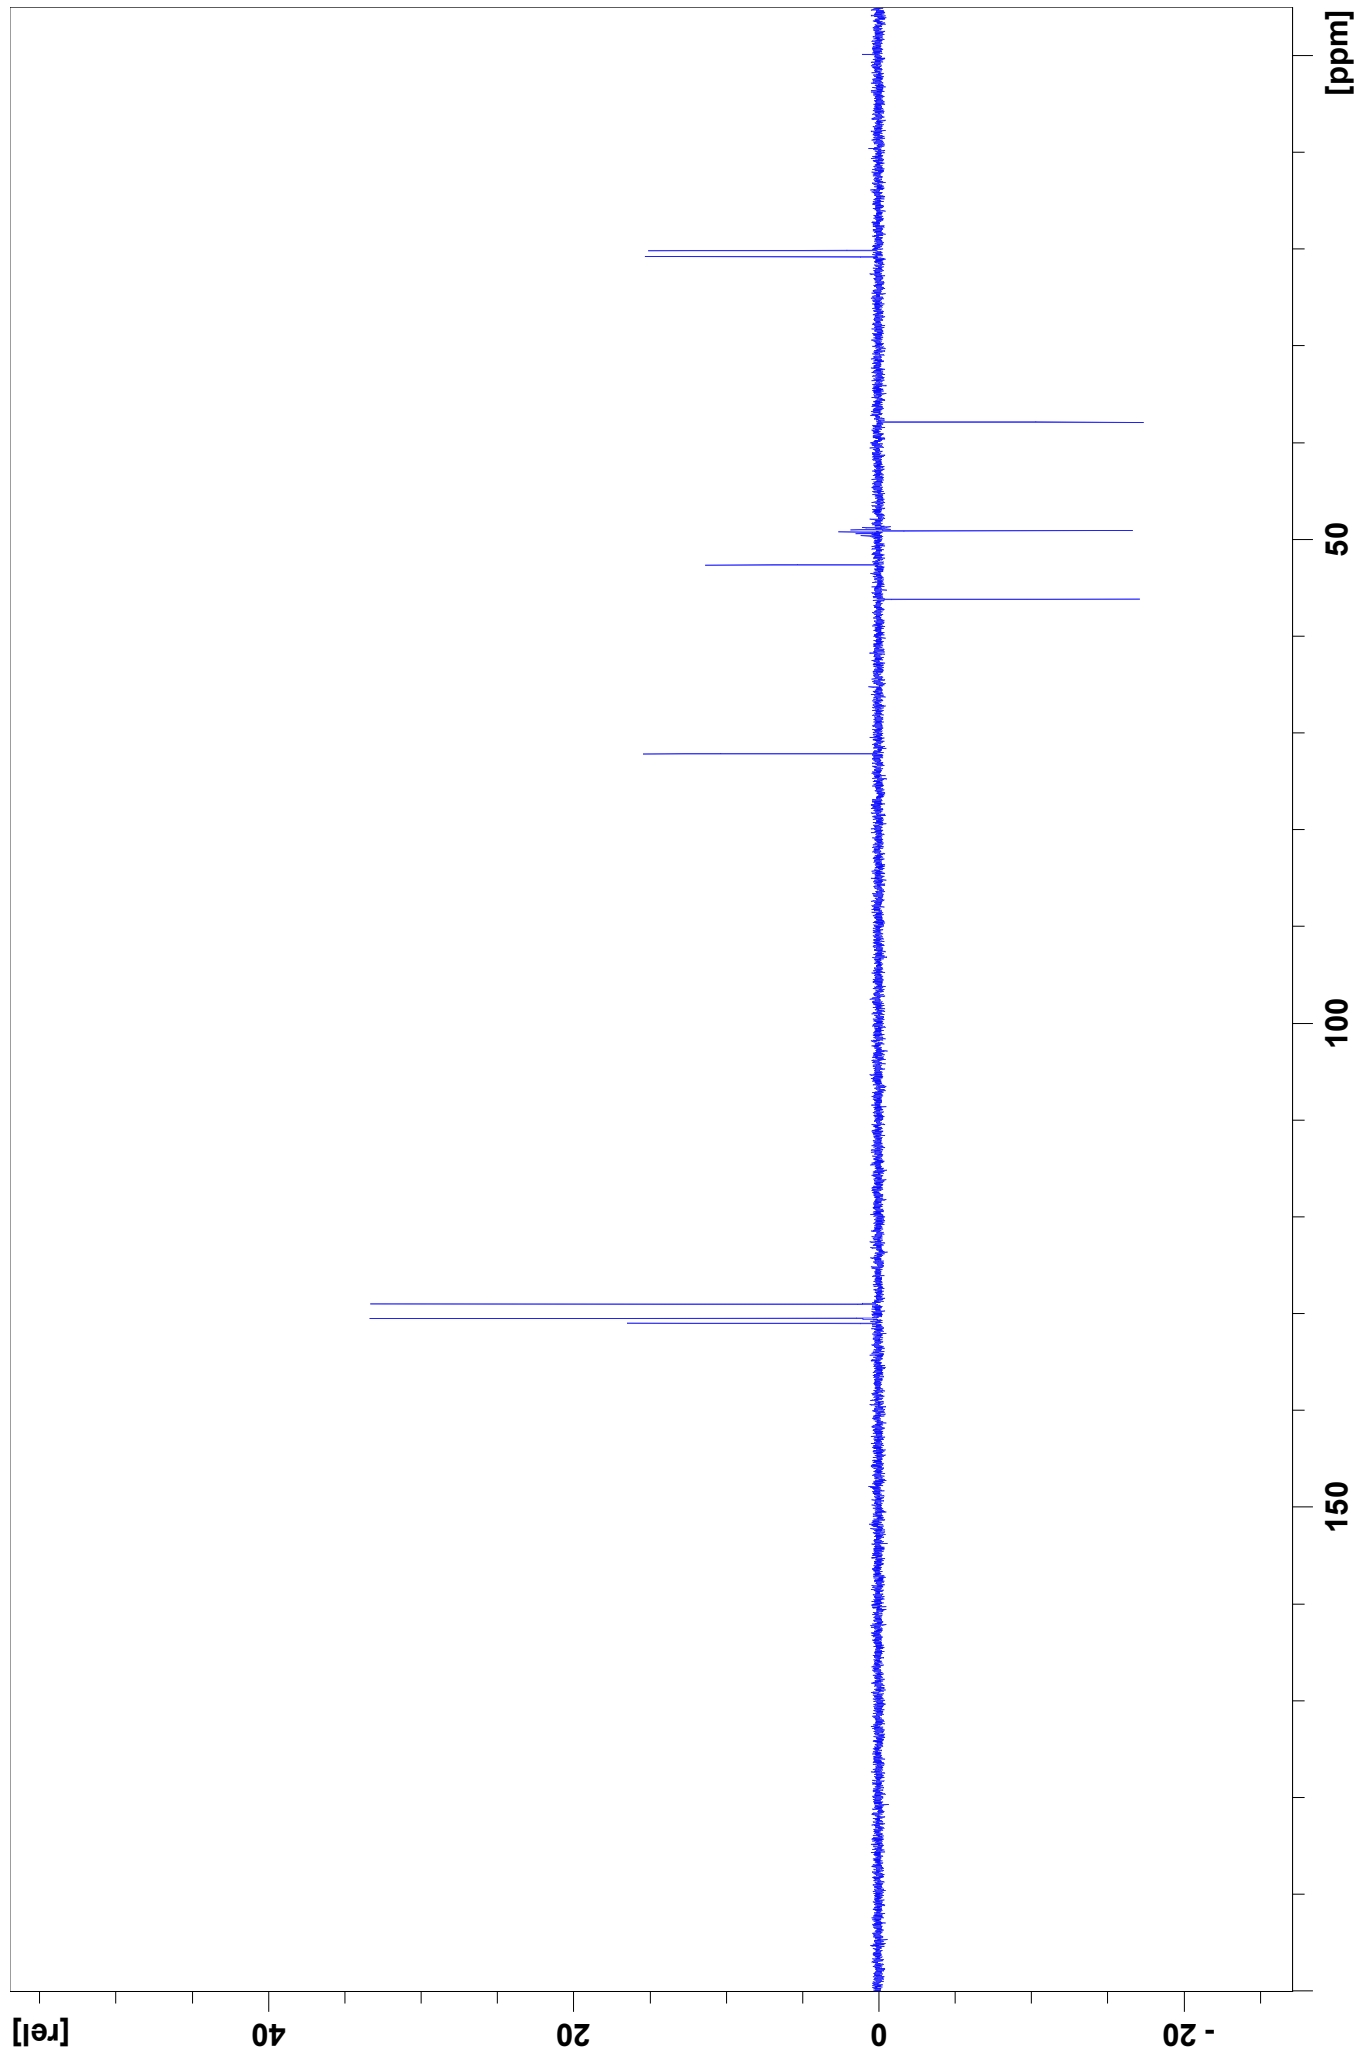



anh.150107 4 1 d: dan

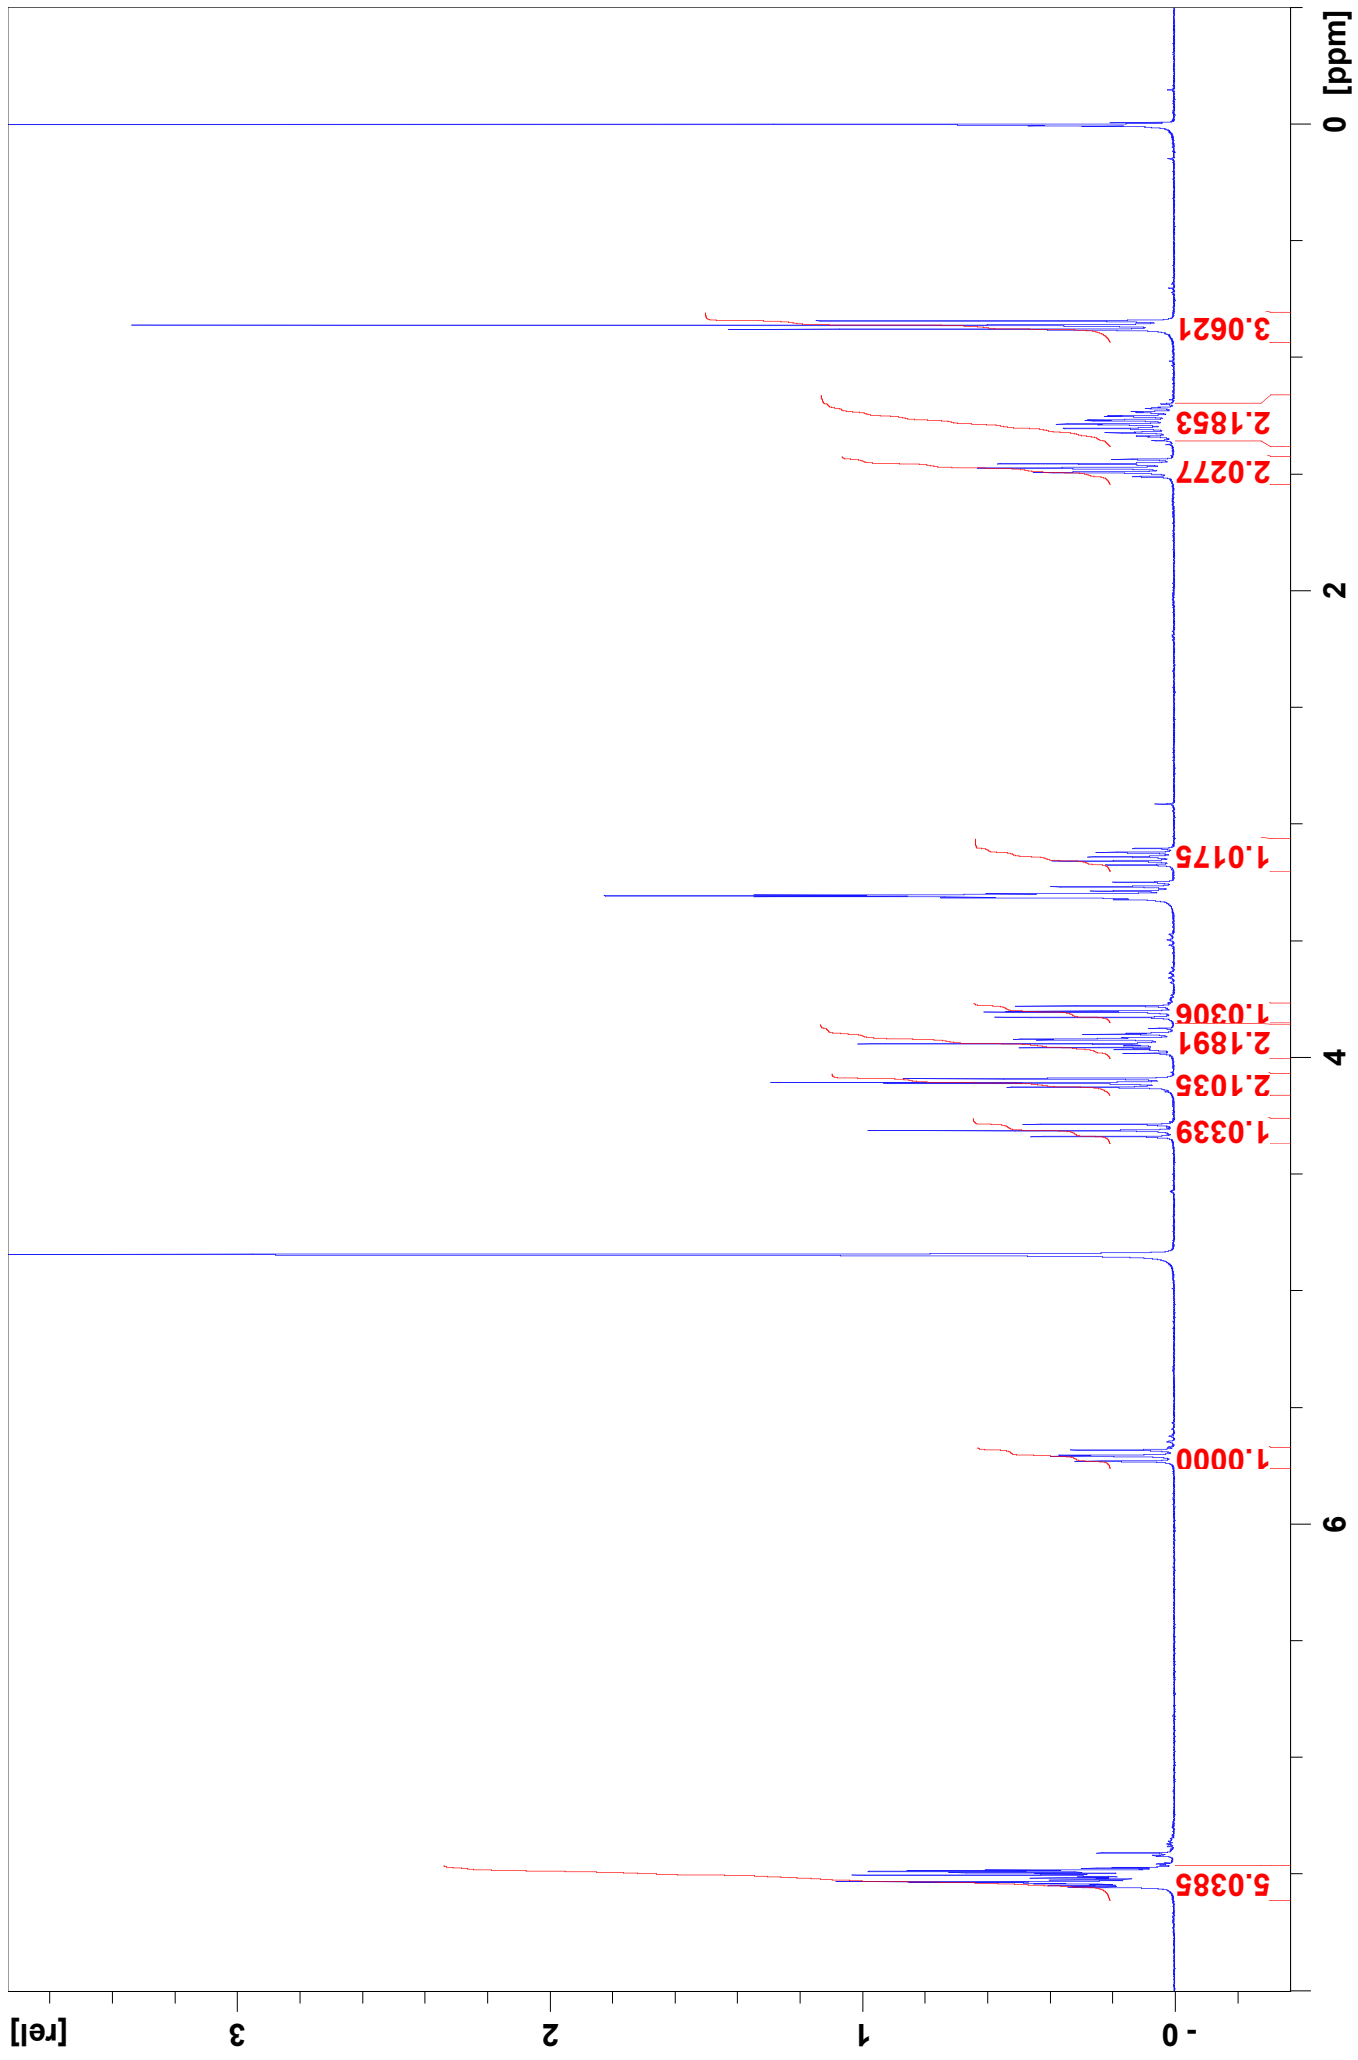

anh.150107 5 1 d: dan

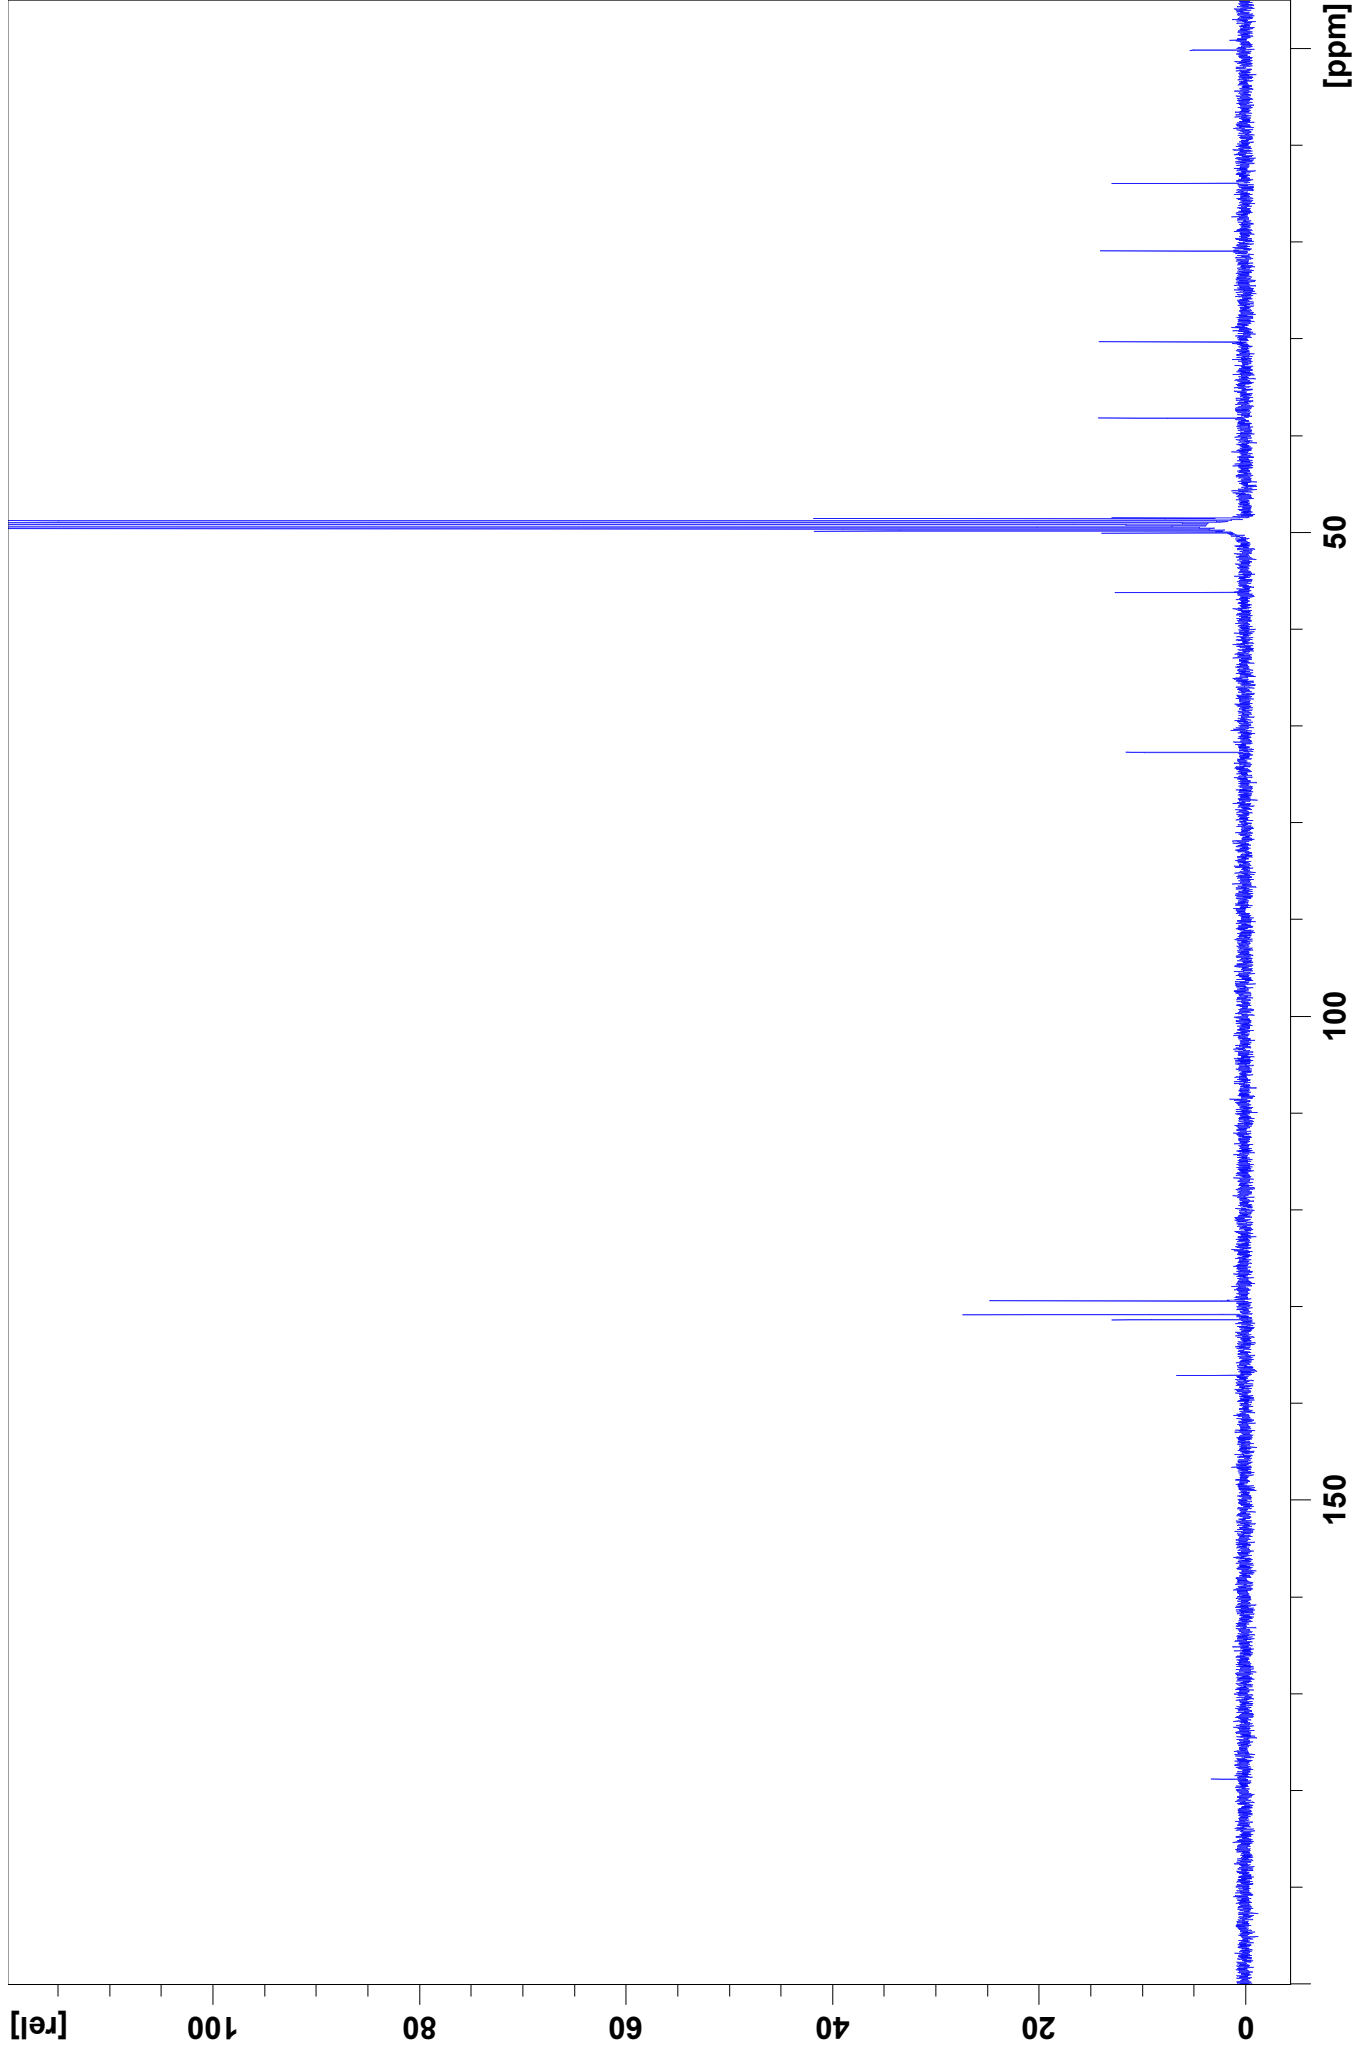

anh.150107 6 1 d: dan

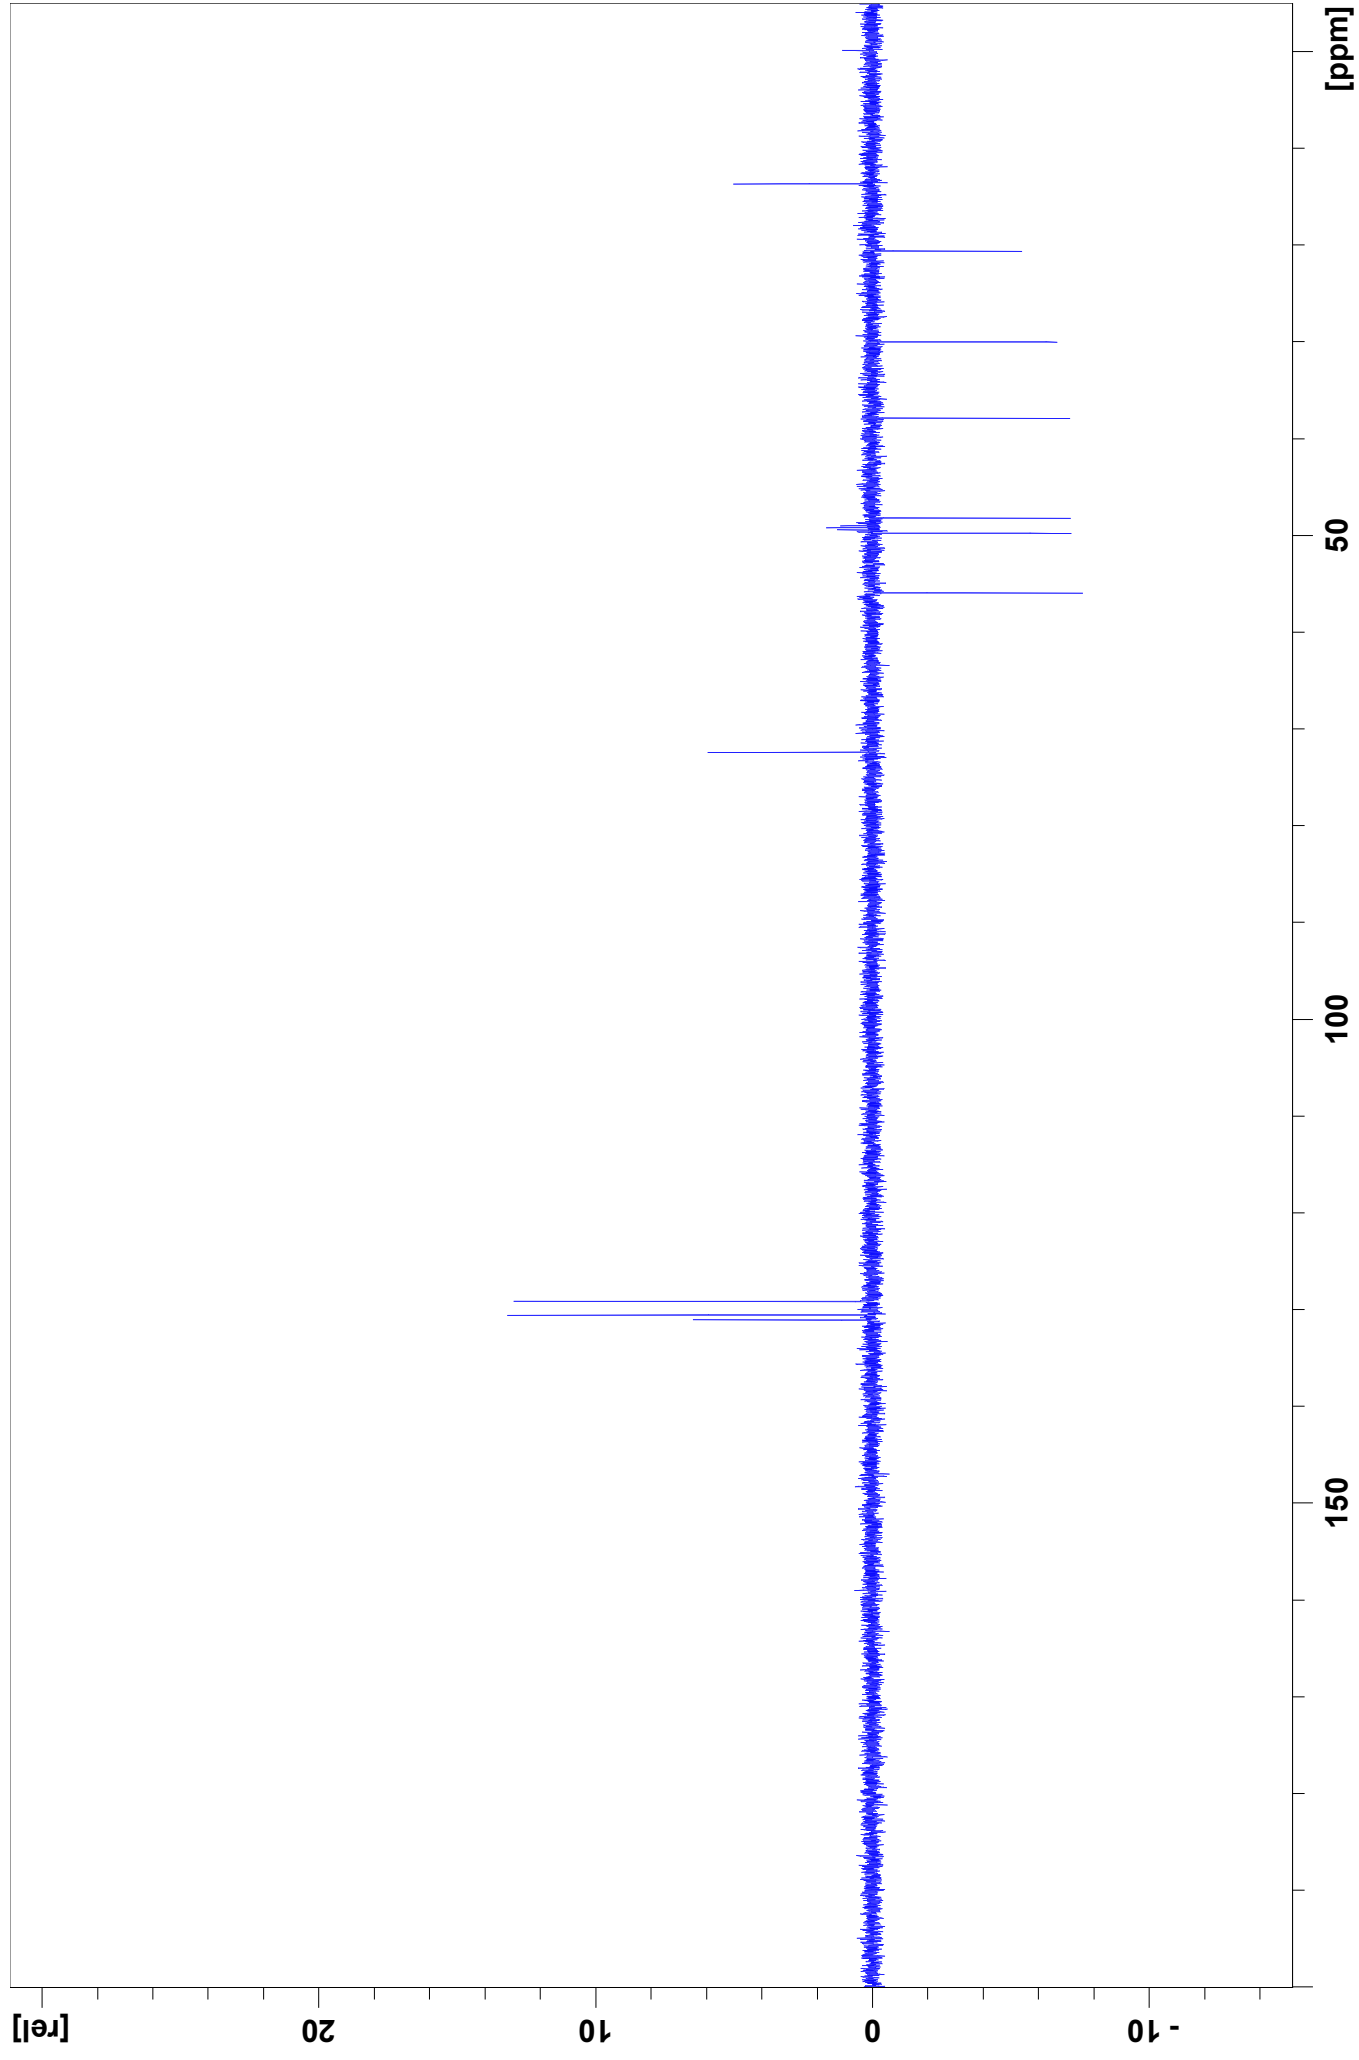

anh.160107 1 1 d: dan

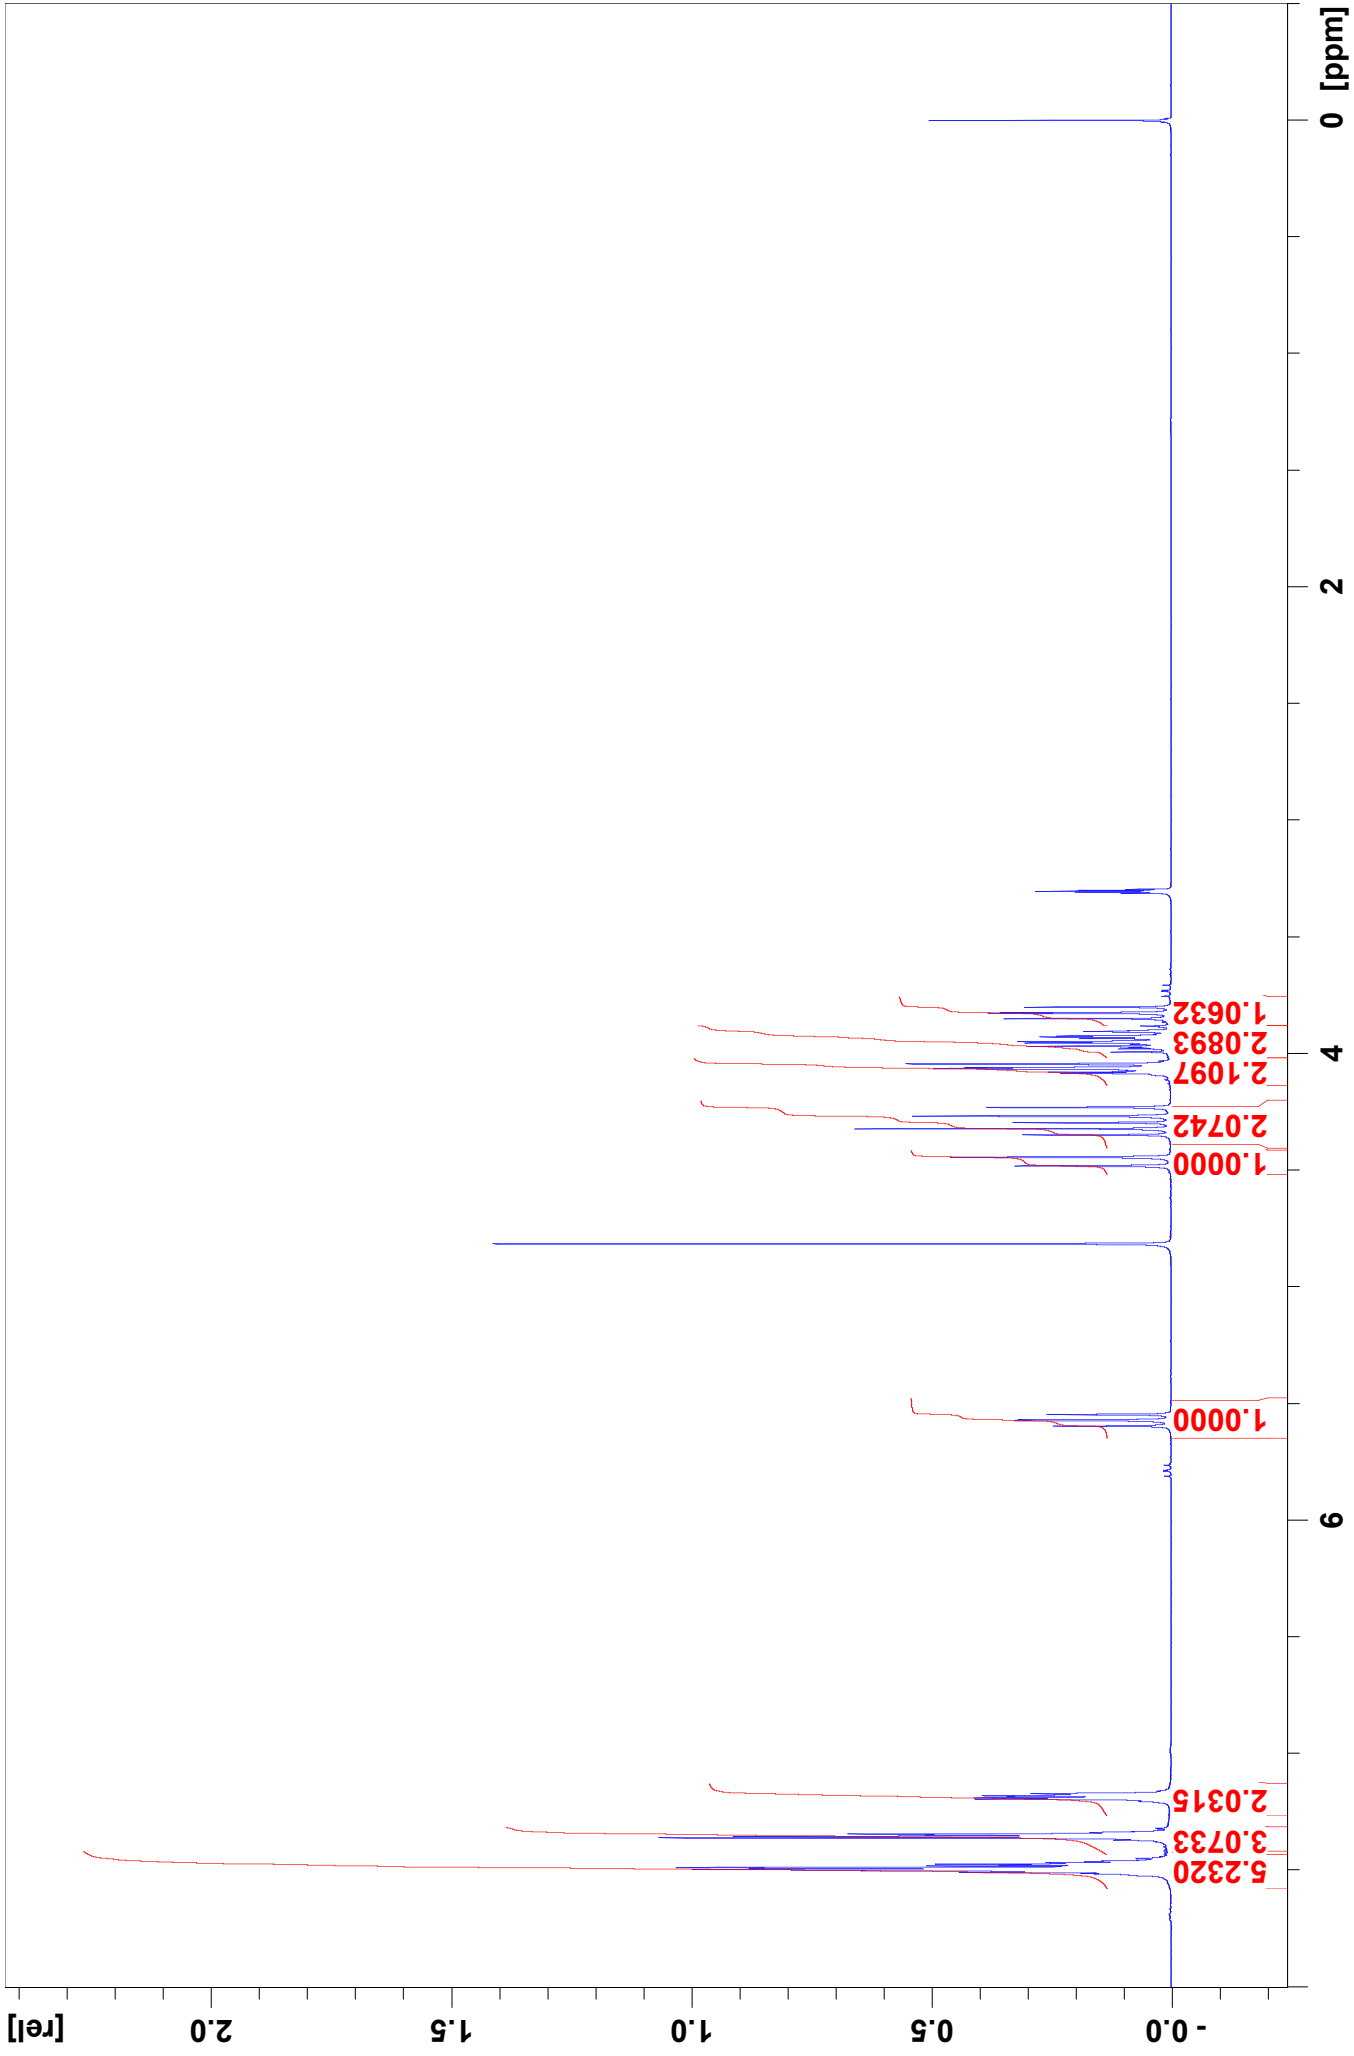

anh.160107 2 1 d: dan

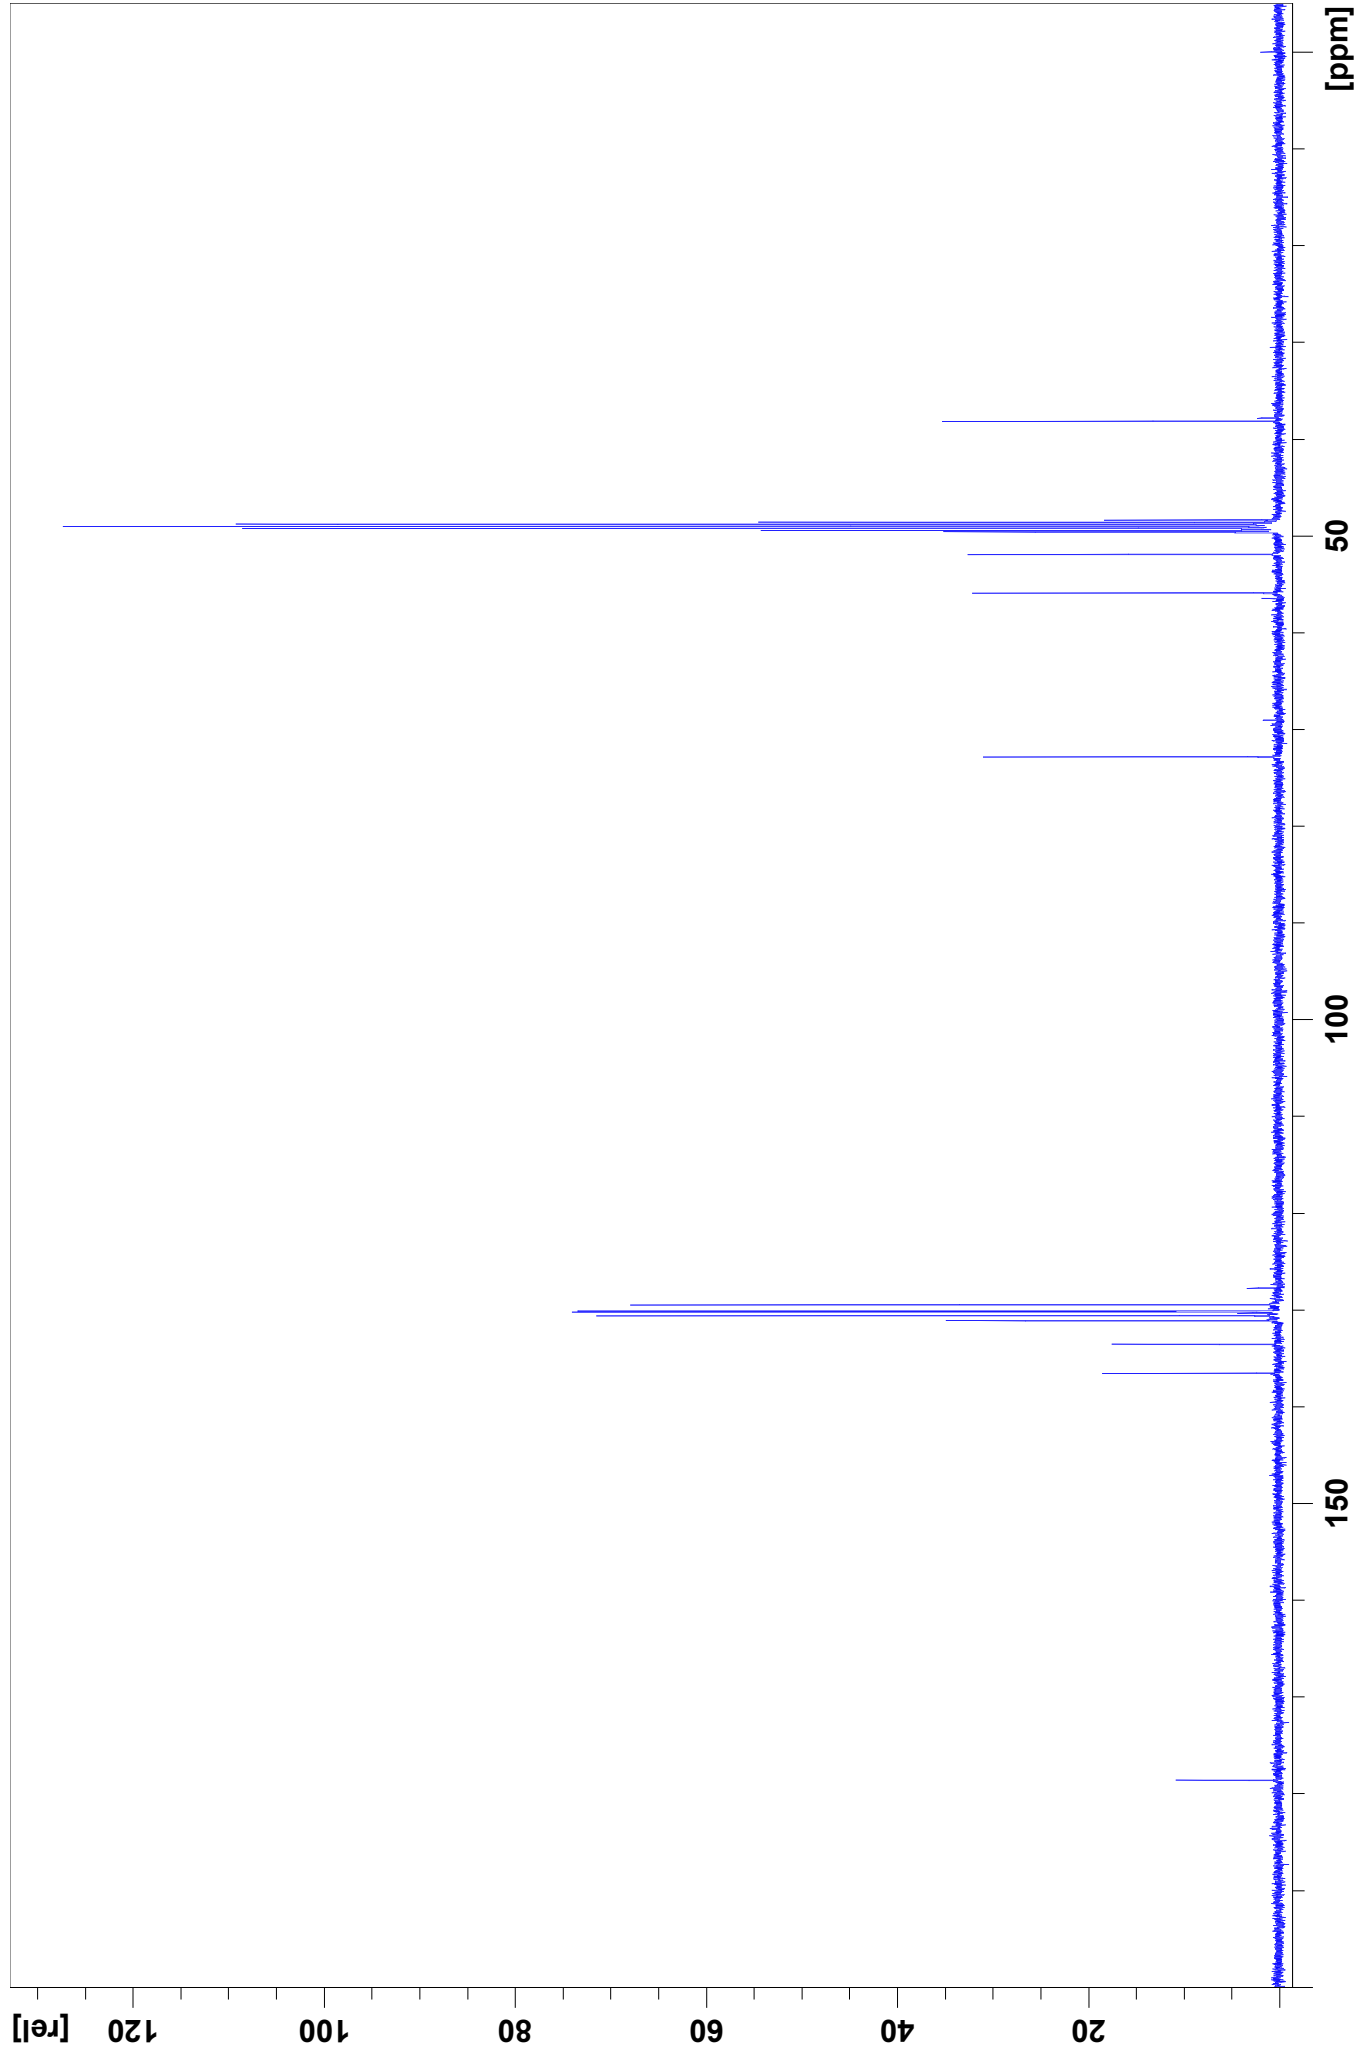

anh.160107 3 1 d: dan

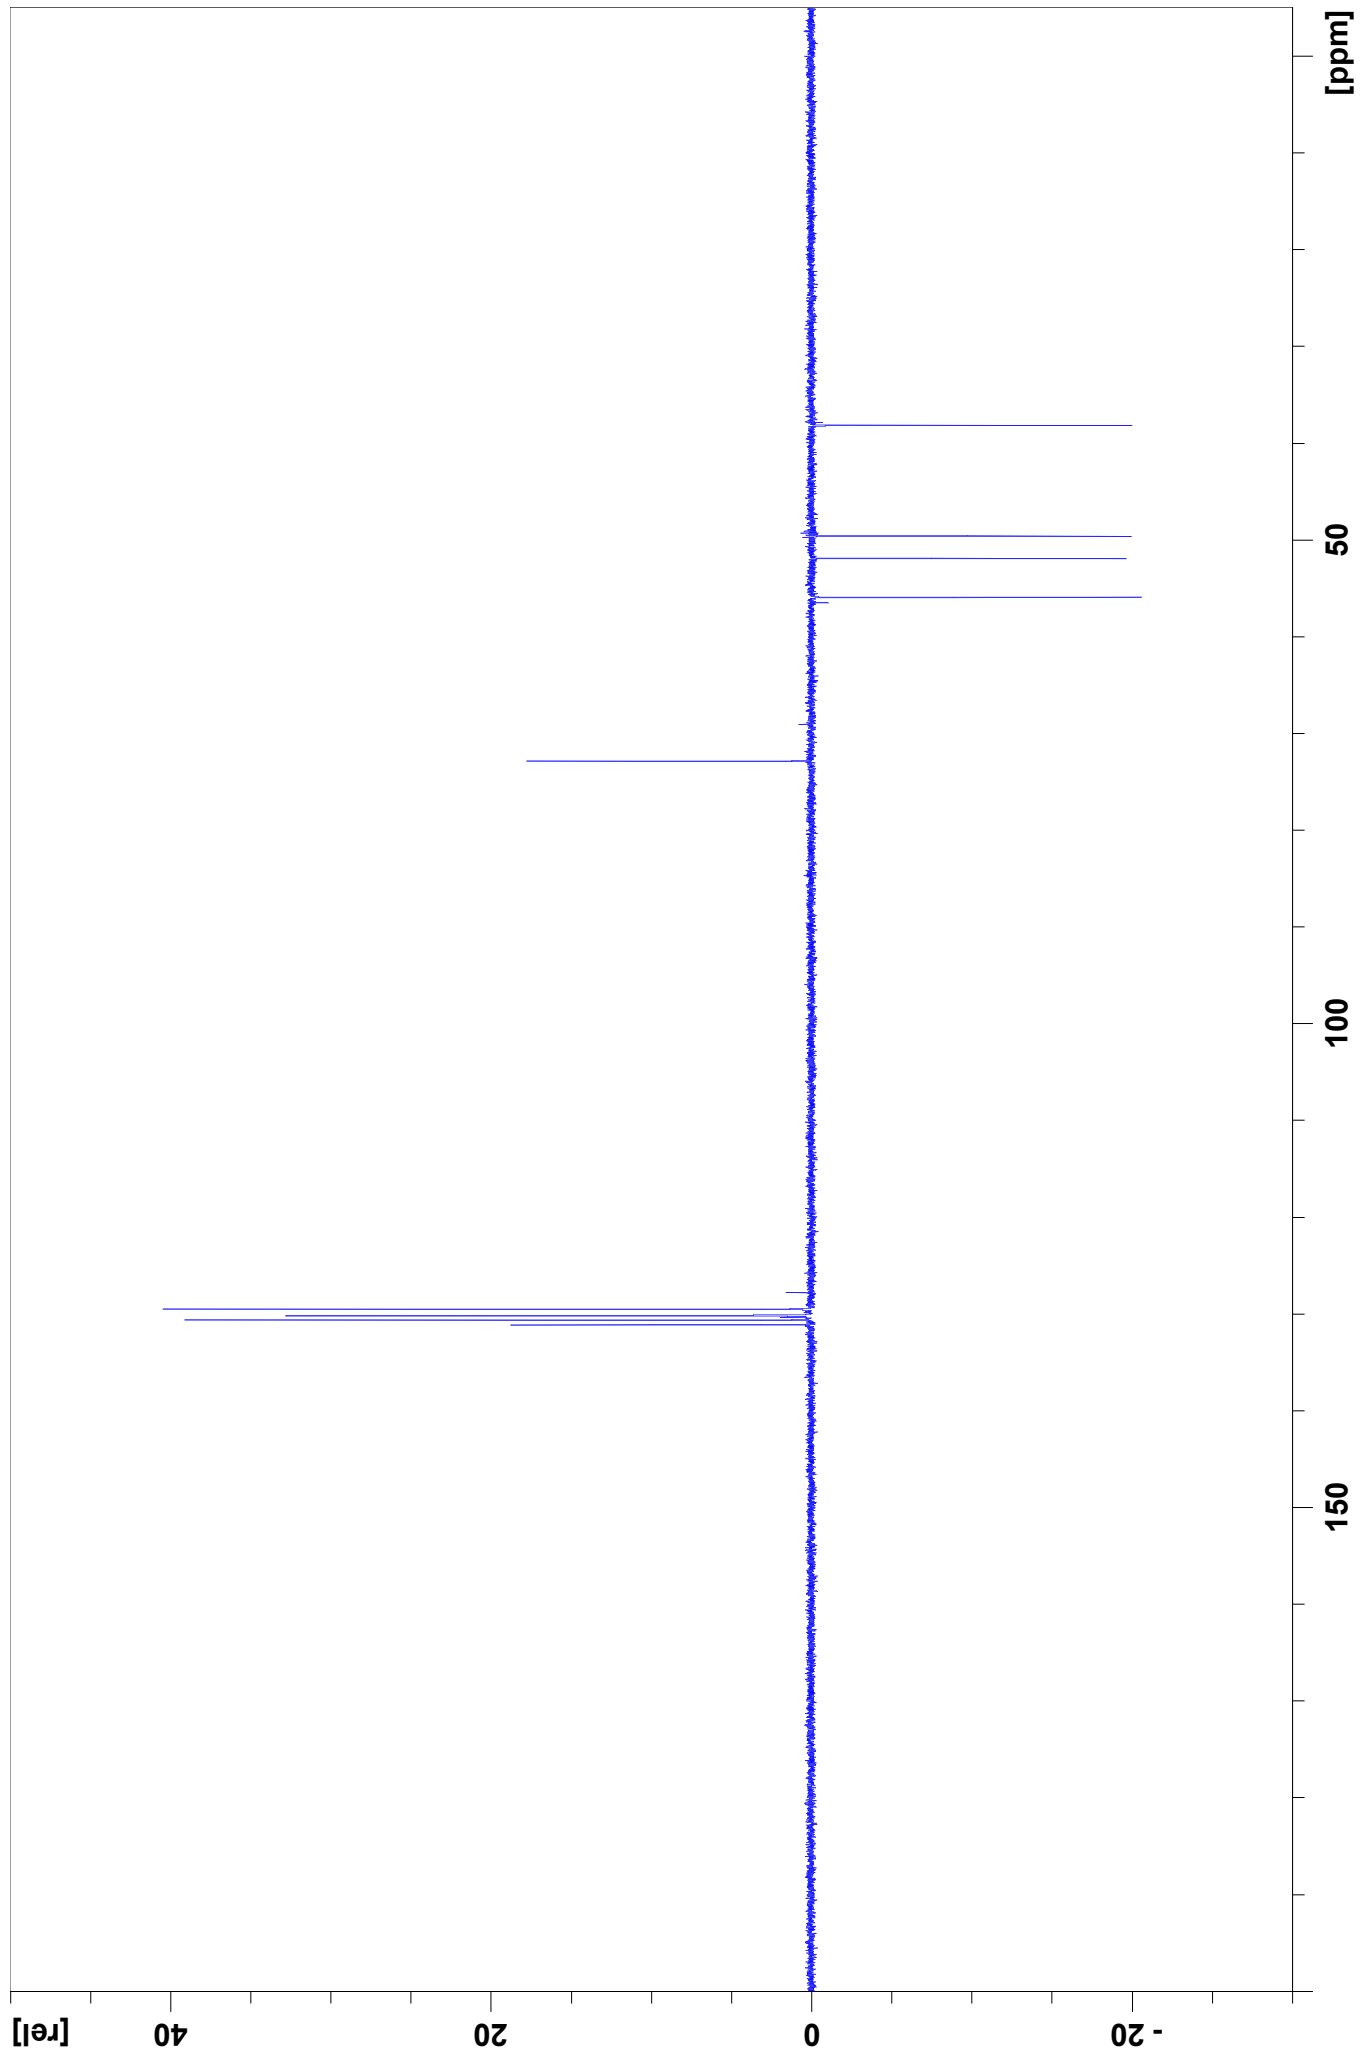

anh.240107 4 1 d: dan

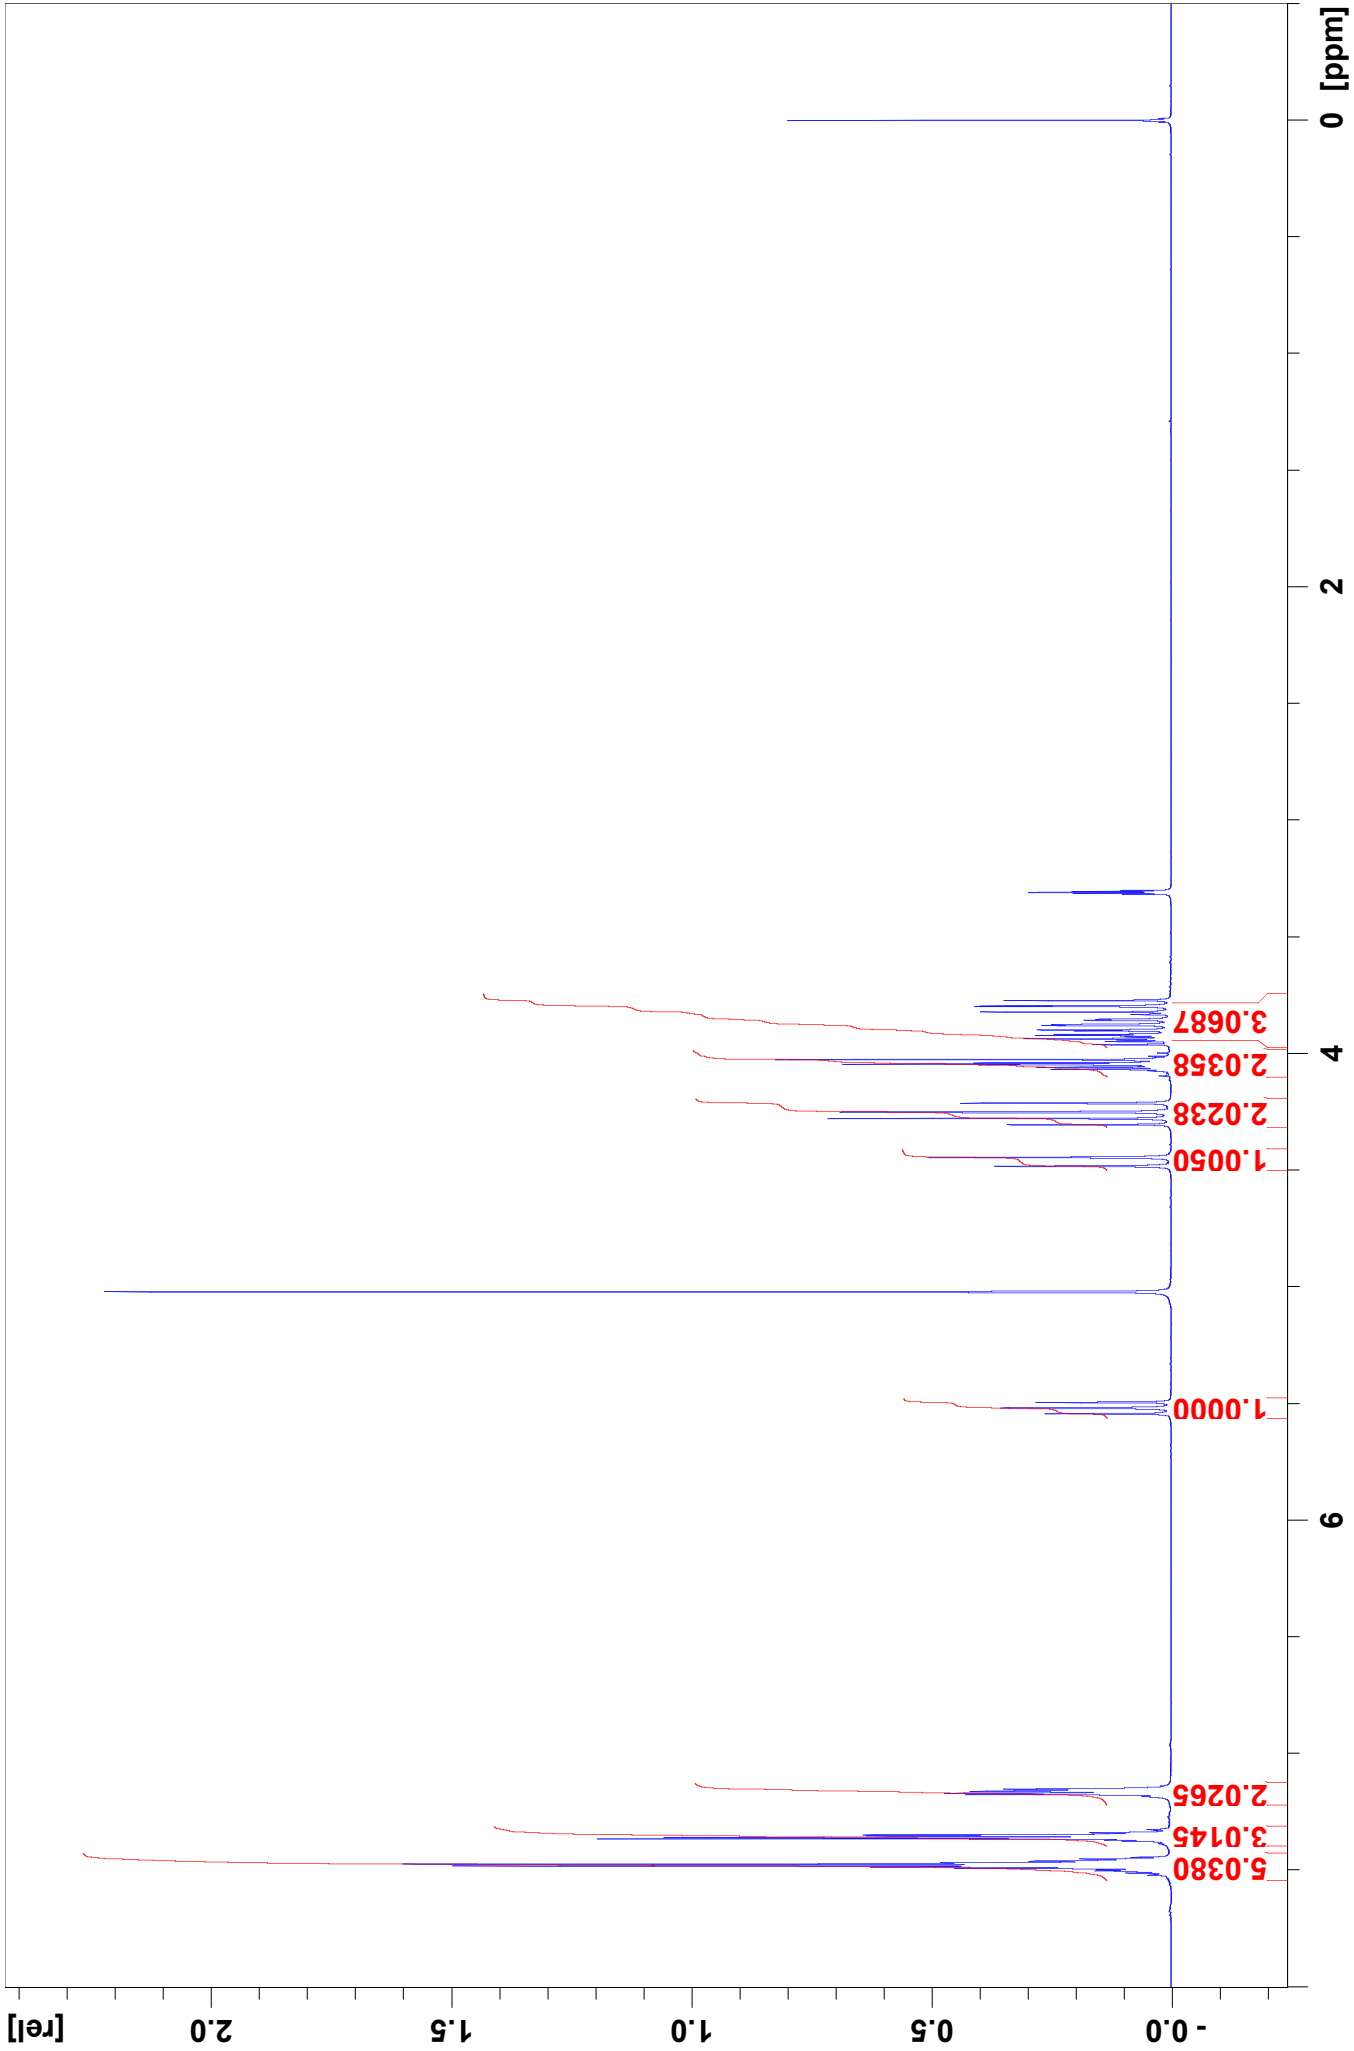

anh.240107 5 1 d: dan

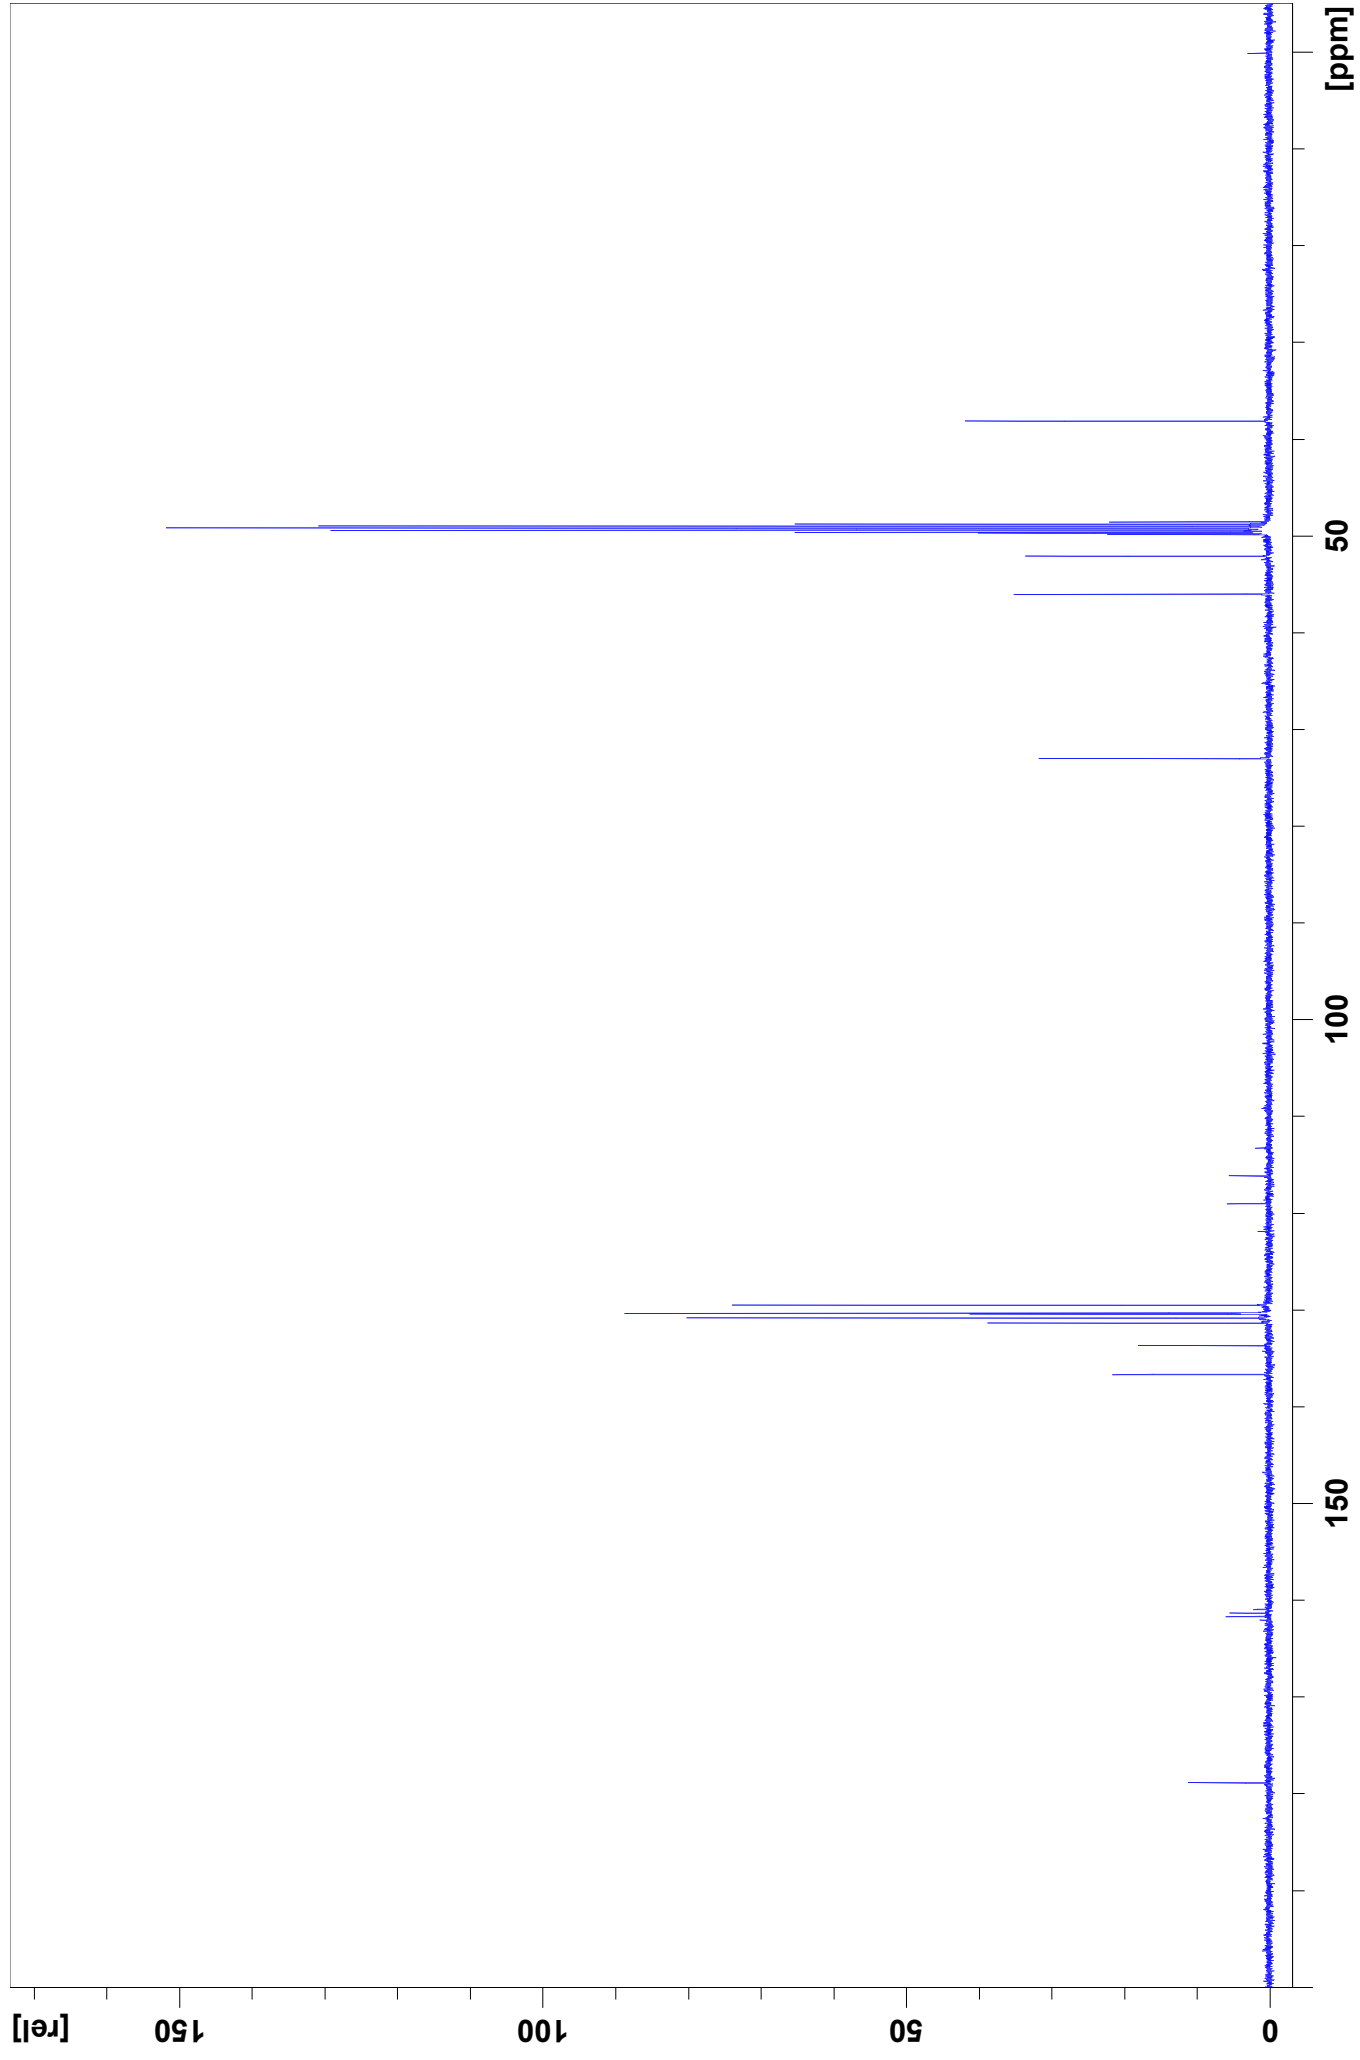



anh.240107 6 1 d: dan

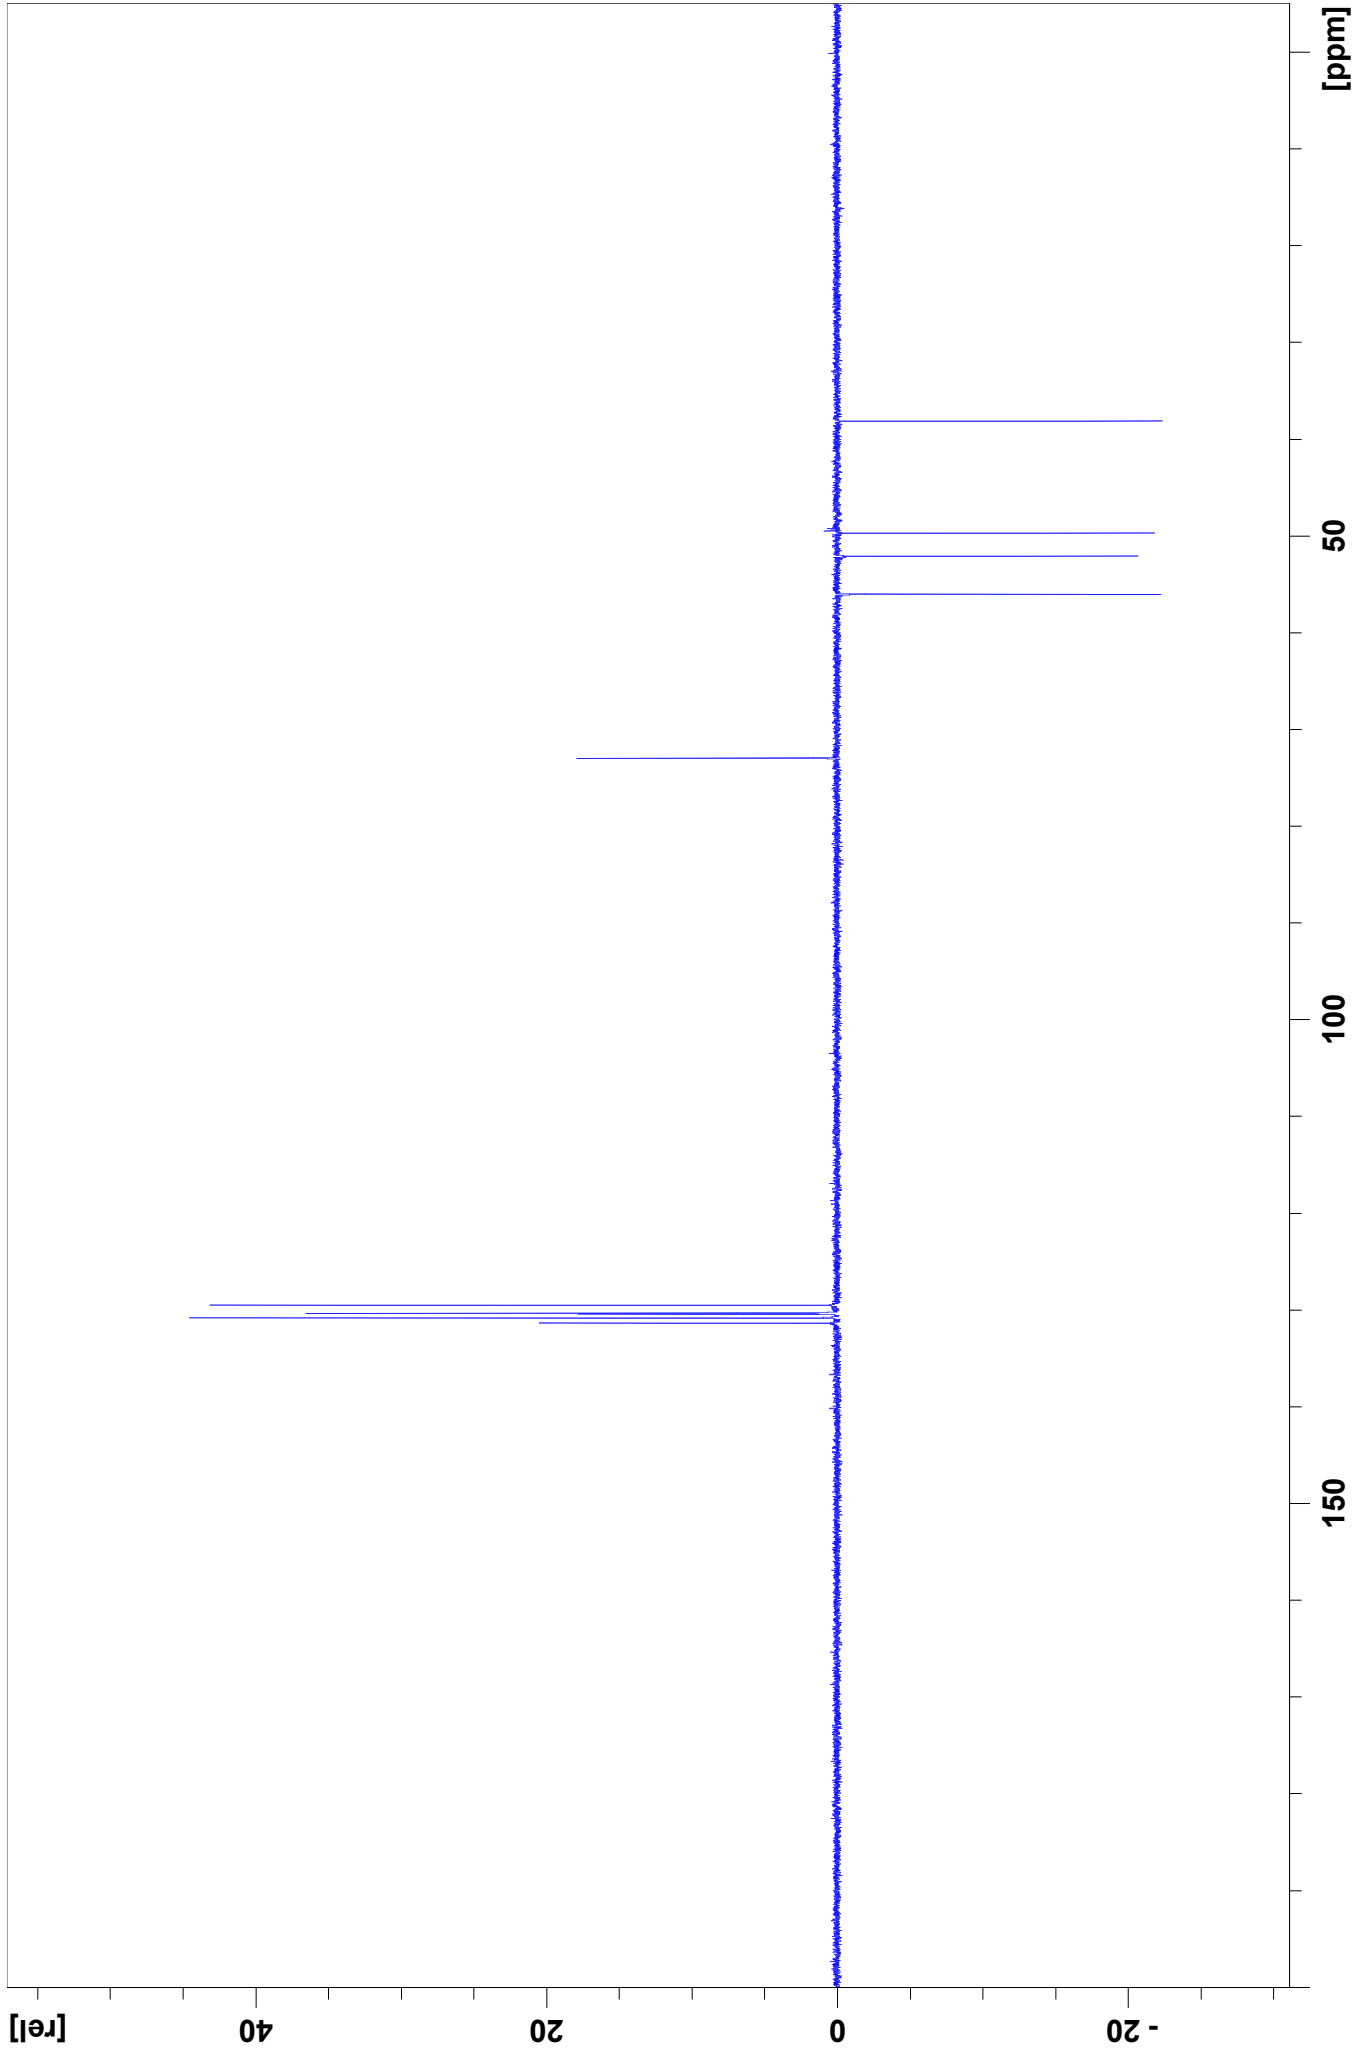

anh.240107 10 1 d: dan

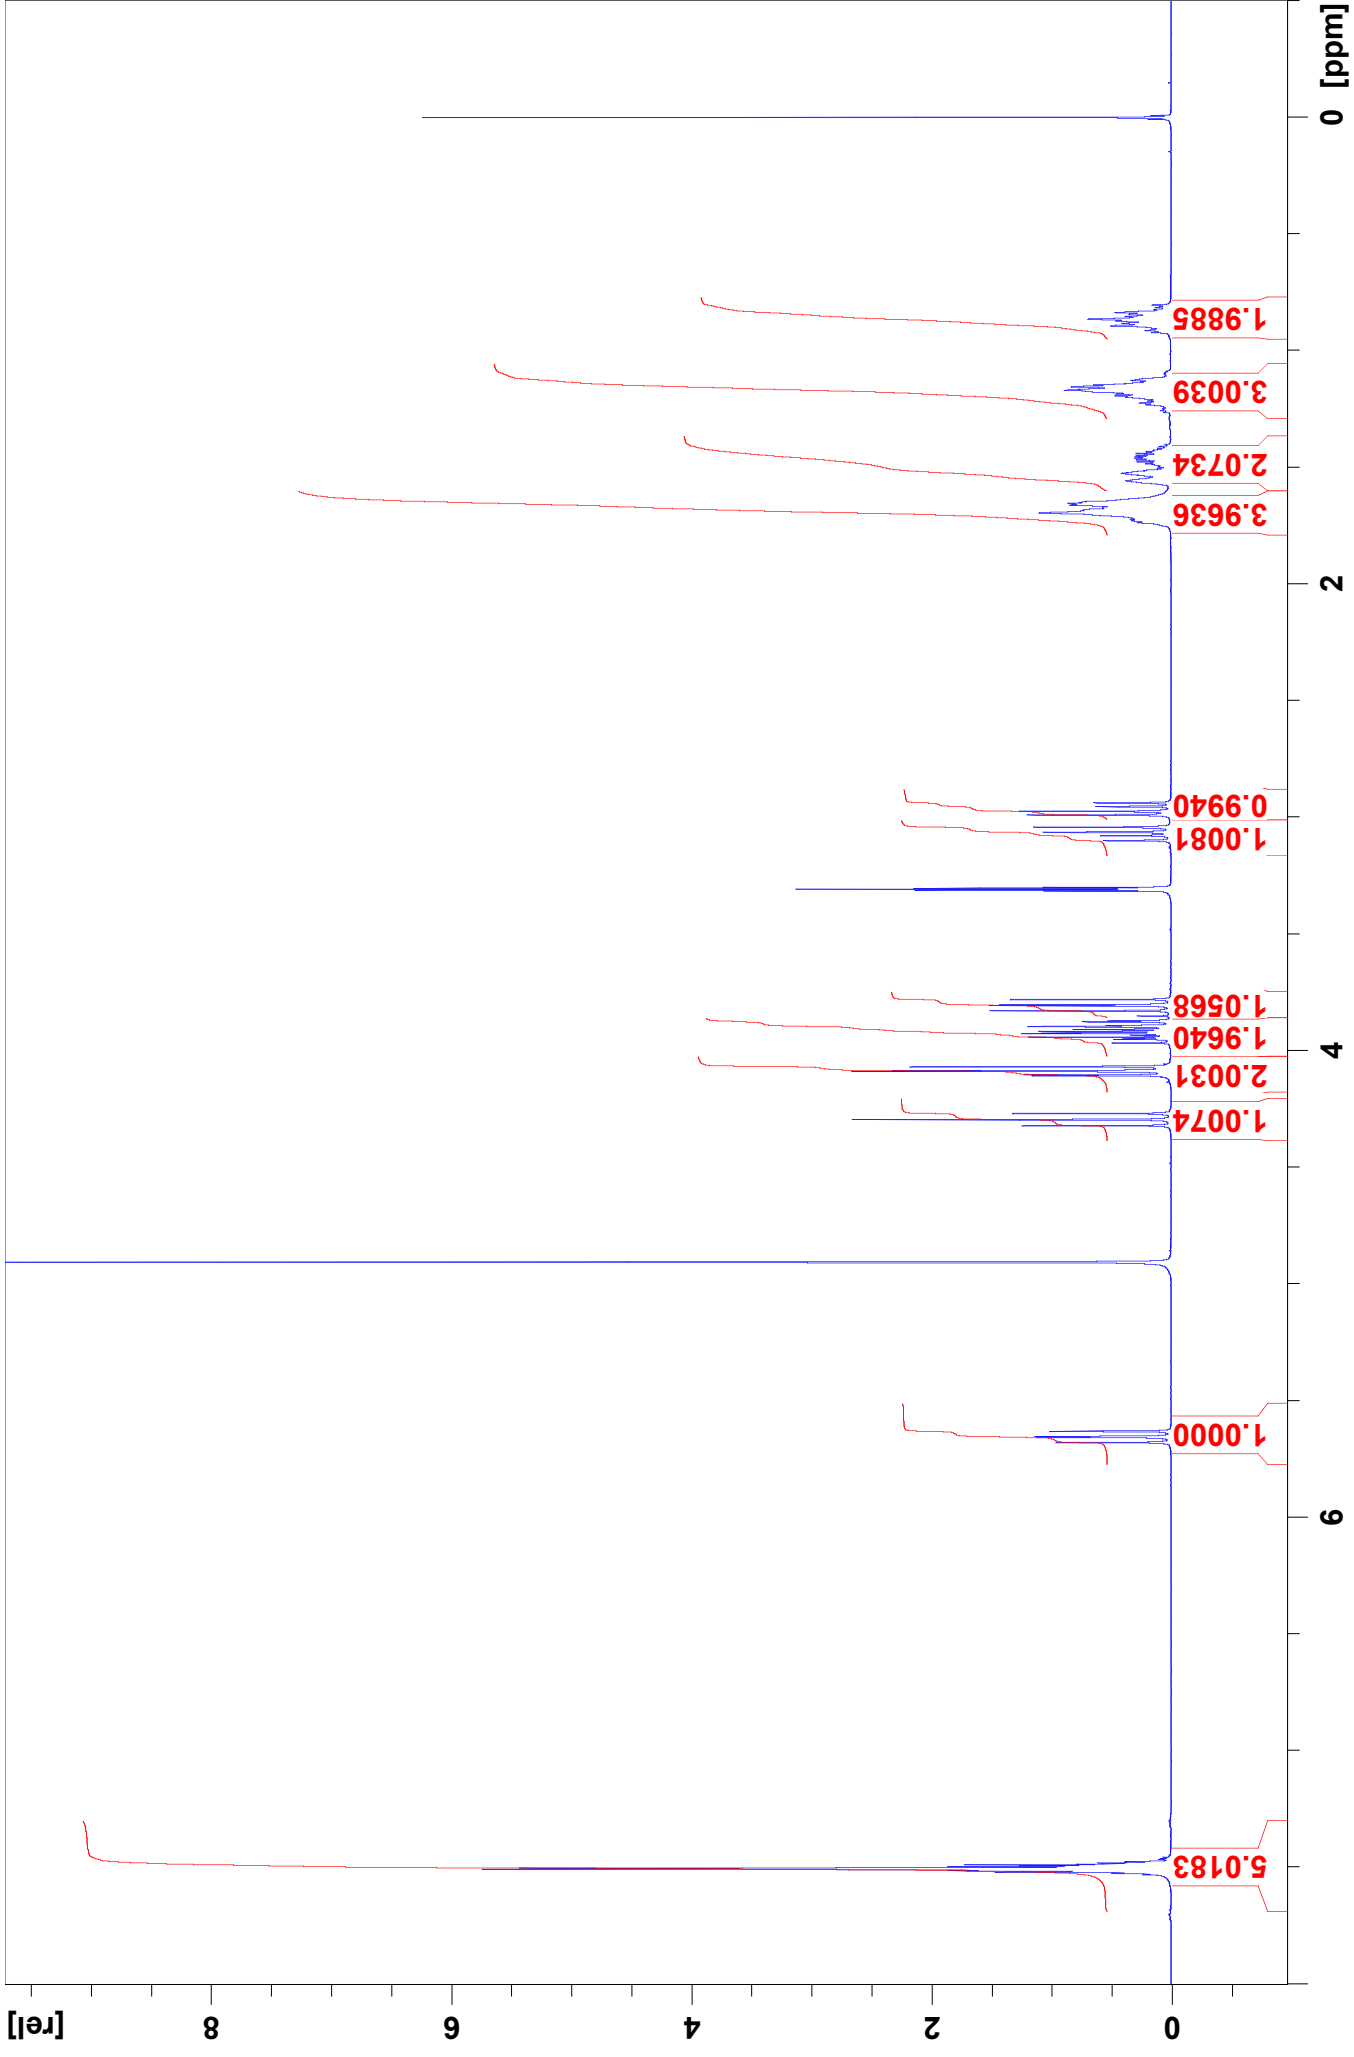

anh.240107 11 1 d: dan

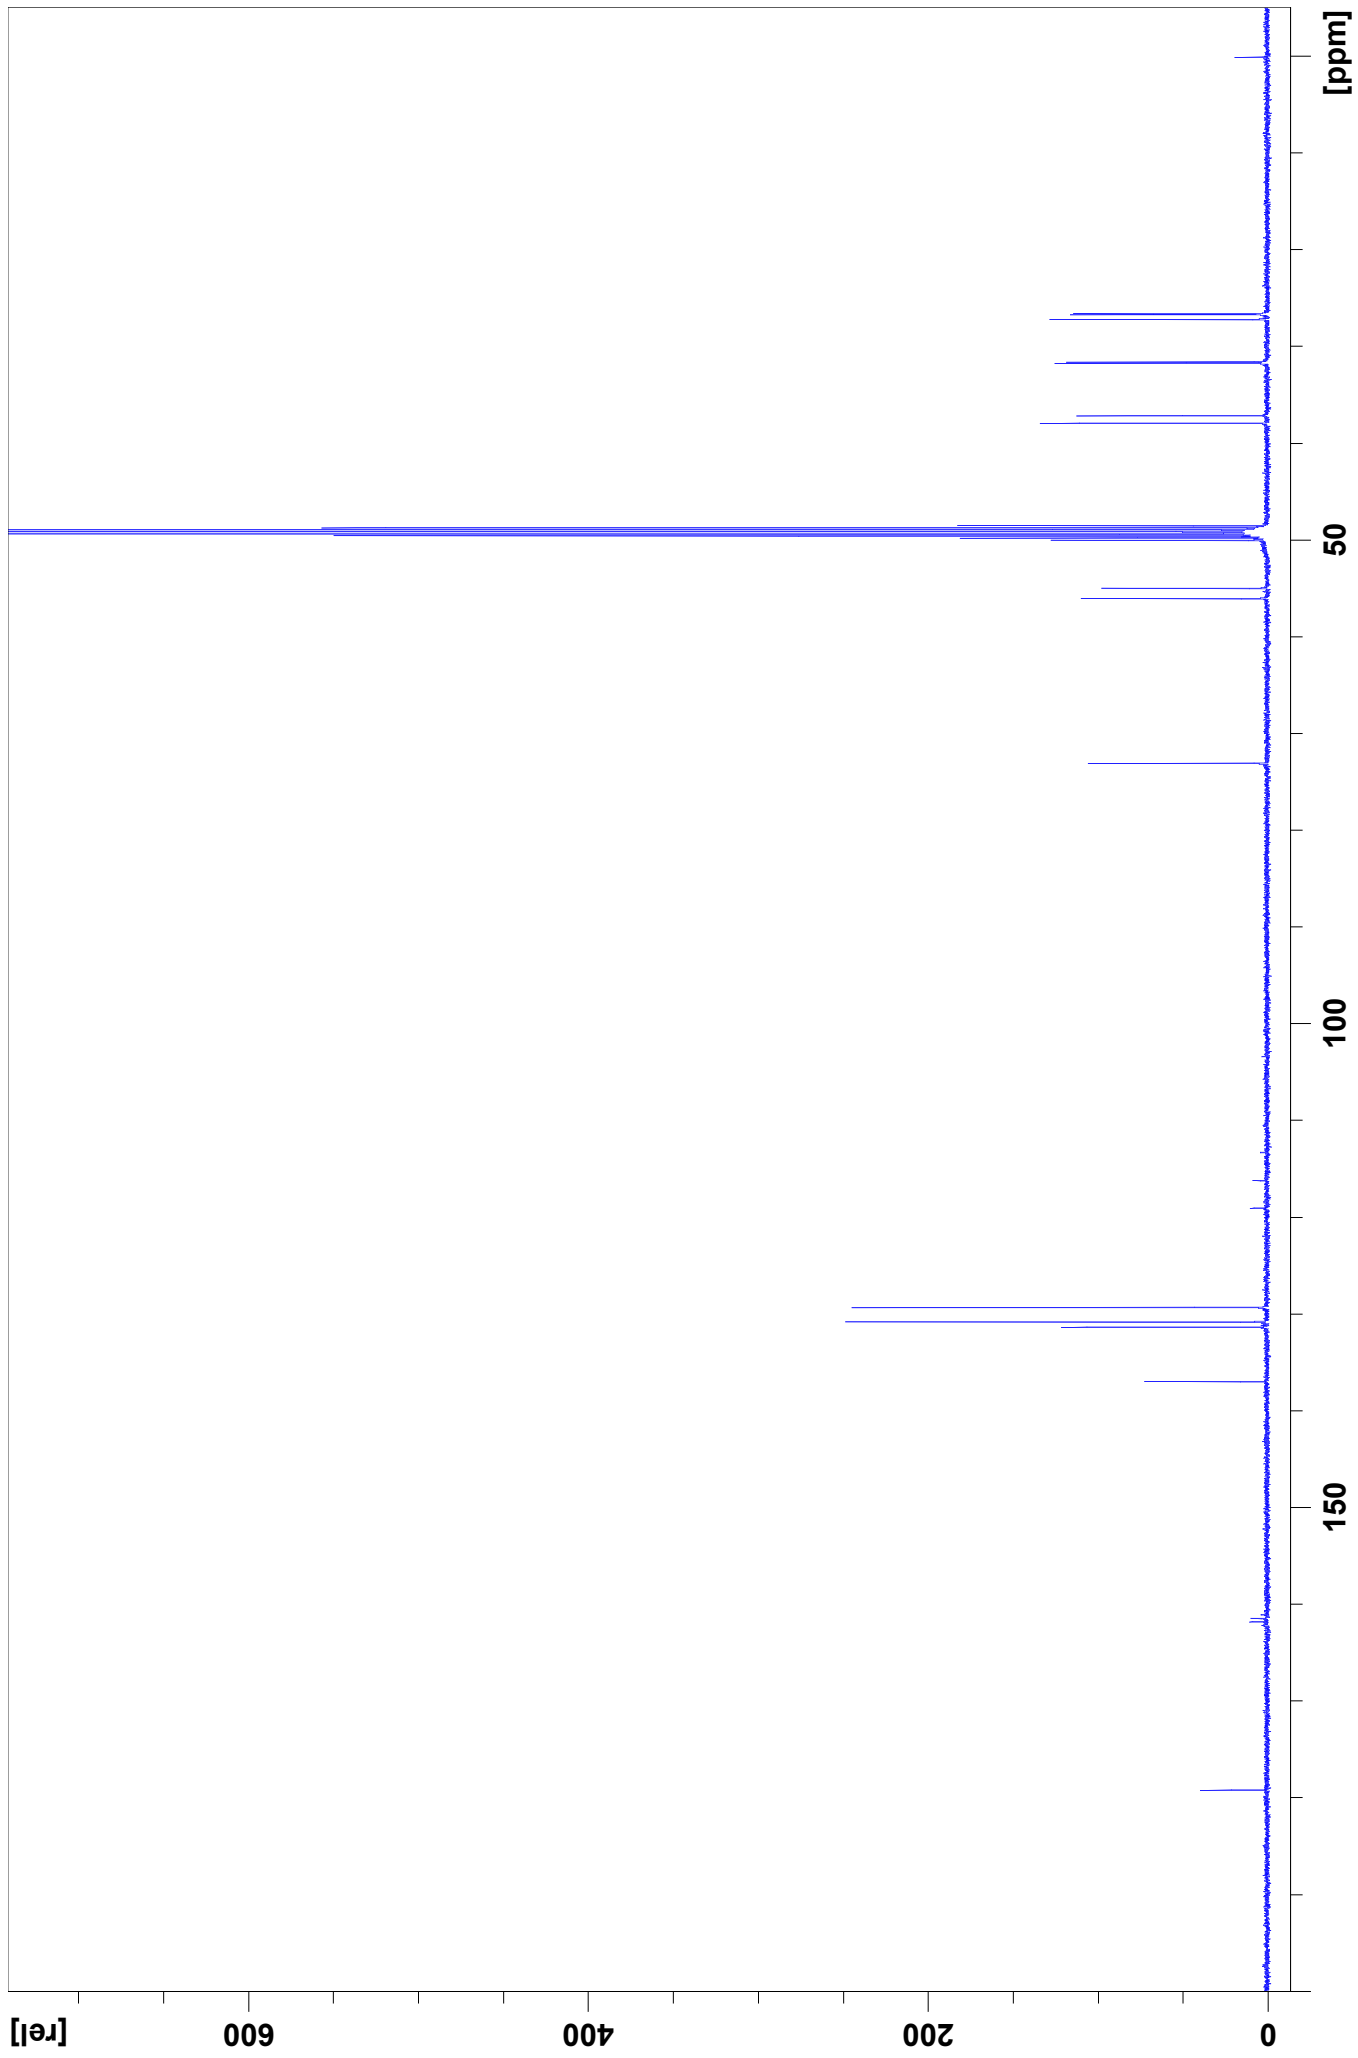

anh.240107 12 1 d: dan

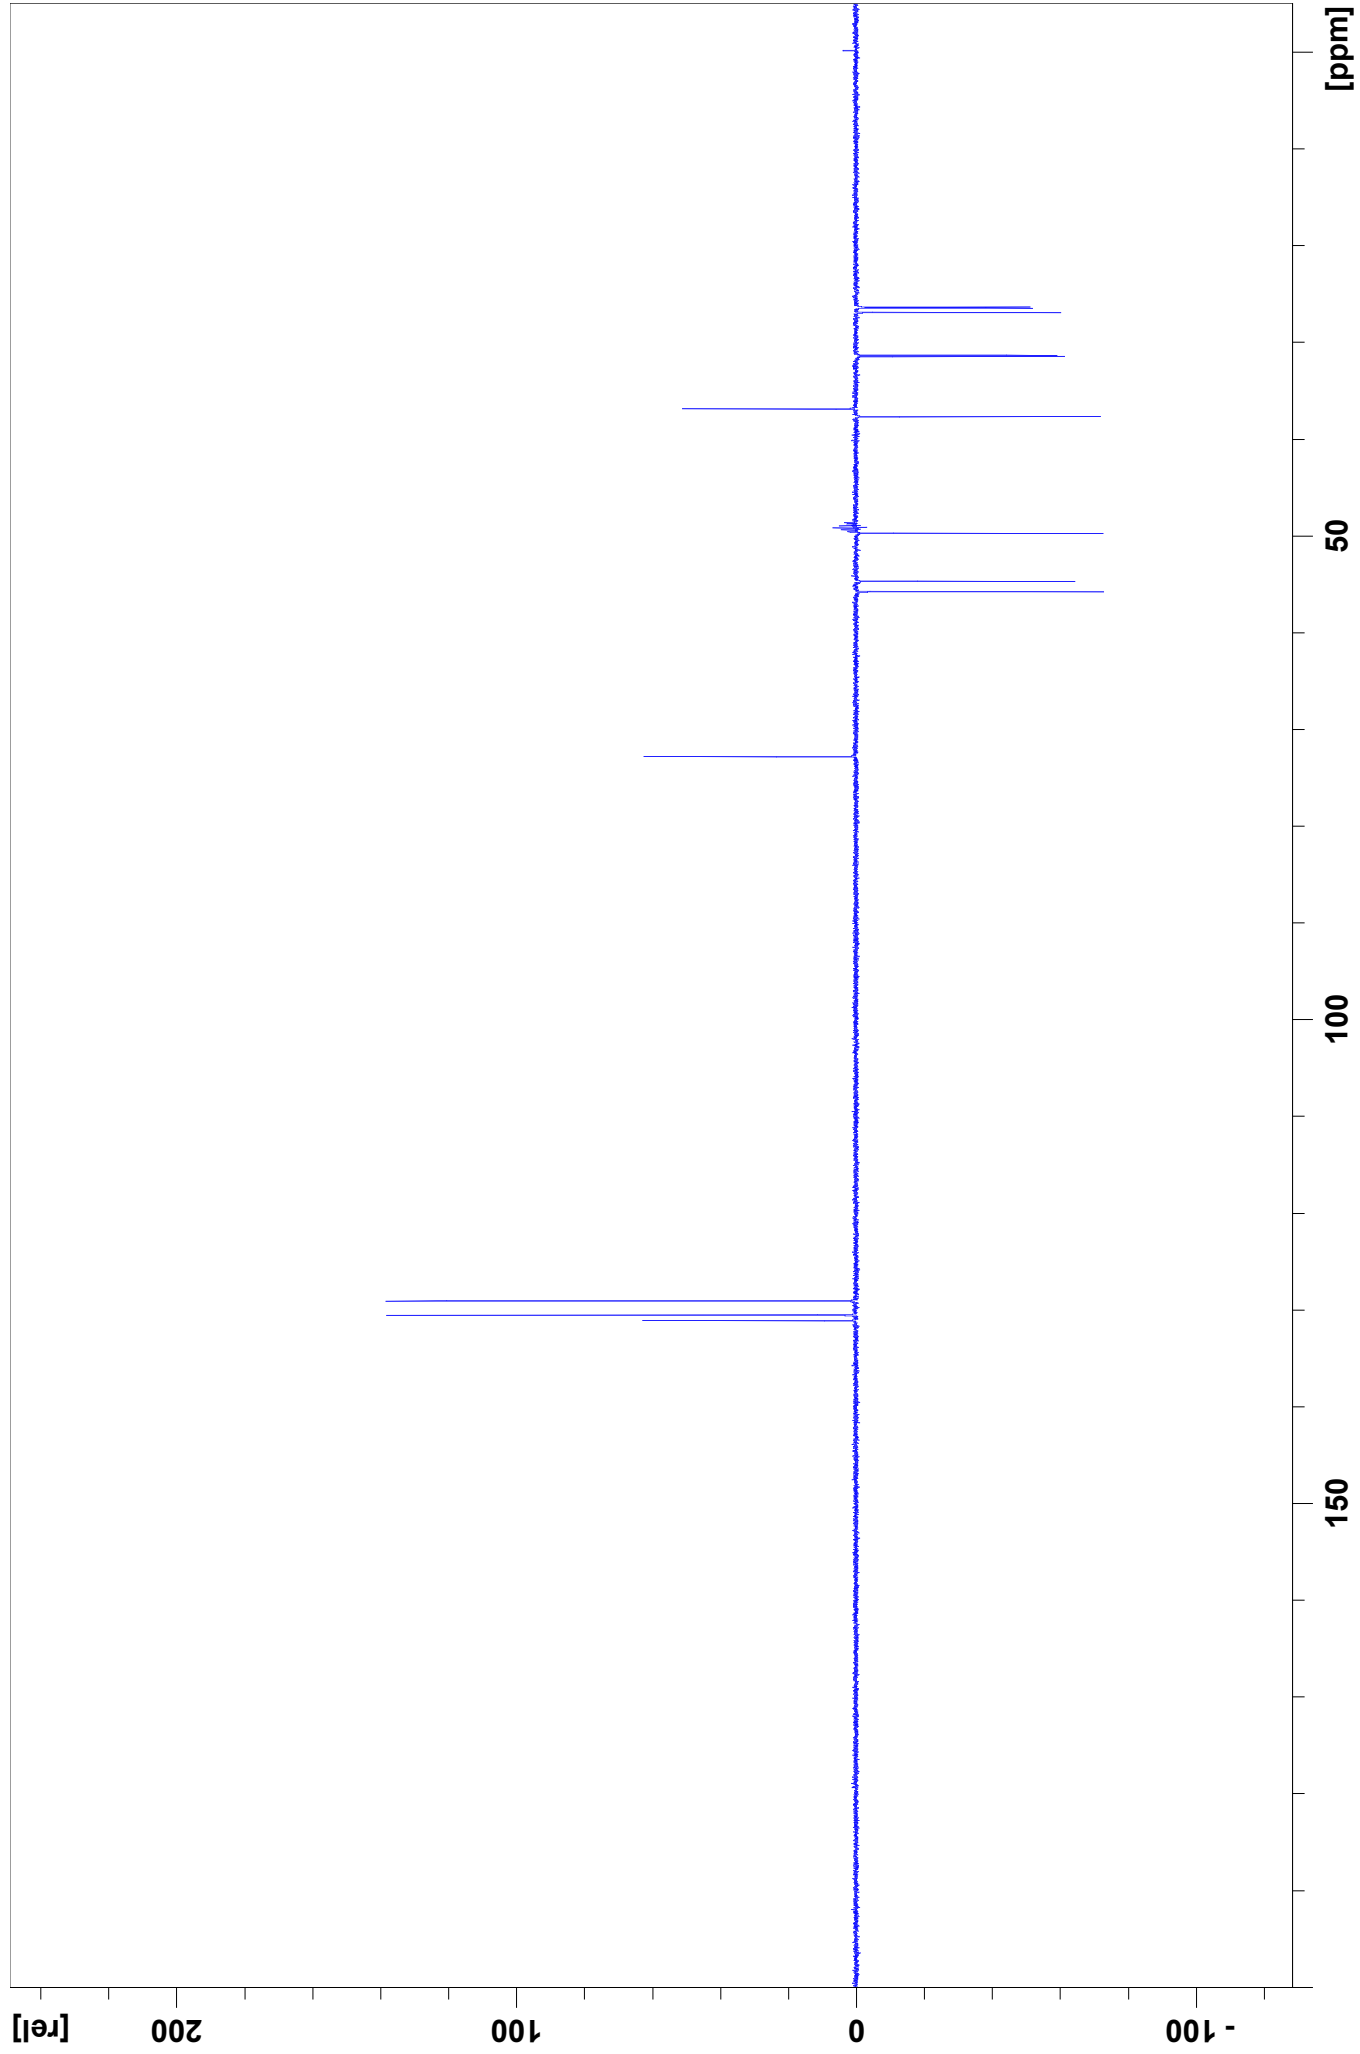

**Table S1. Full assignment of the NMR spectral data obtained for compound 12.**

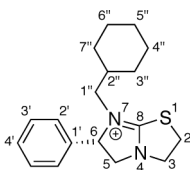

| Position | <sup>13</sup> C <sup>a</sup> | <sup>1</sup> H <sup>a,b</sup>                                                 | COSY <sup>a,c</sup>    | NOESY <sup>a,c,d</sup> | HSQC <sup>a,c,e</sup> | HMBC <sup>a,c,f</sup>  |
|----------|------------------------------|-------------------------------------------------------------------------------|------------------------|------------------------|-----------------------|------------------------|
| 2        | 49.9                         | 3.87 (m, A/B part of a larger spin system)                                    | H-3A, H-3B             | H-3A, H-3B             | C-2                   | C-3, C-8               |
|          |                              | 3.93 (m, A/B part of a larger spin system)                                    |                        |                        |                       |                        |
| 3        | 37.8                         | 4.08 (m, A/B part of a larger spin system)                                    | H-2                    | H-2                    | C-3                   | C-2, C-8               |
|          |                              | 4.10 (m, A/B part of a larger spin system)                                    | H-2                    | H-2                    | C-3                   |                        |
| 5        | 55.9                         | α: 3.80 (dd, $J_{5\alpha, 5\beta} = 10.4$ , $J_{5\alpha, 6} = 8.8$ )          | H-5β, H-6              | H-5β, H-2'             | C-5                   | C-6, C-8, C-1'         |
|          |                              | β: 4.29 (t, $J_{5\beta, 5\alpha} = 10.4$ , $J_{5\beta, 6} = 10.4$ )           | H-5α, H-6              | H-5α                   | C-5                   | C-6, C-8, C-1'         |
| 6        | 73.0                         | 5.66 (dd, $J_{6, 5\beta} = 10.4$ , $J_{6, 5\alpha} = 8.8$ )                   | H-5α, H-5β, H-2', H-6' | H-2', H-5α, H-5β       | C-6                   | C-5, C-2', C-6', C-1'' |
| 8        | 179.1                        |                                                                               |                        |                        |                       |                        |
| 1'       | 136.9                        |                                                                               |                        |                        |                       |                        |
| 2'       | 129.2                        | 7.51 (m)                                                                      | H-6                    | H-6, H-5α              | C-2'                  | C-6                    |
| 3'       | 130.7                        | 7.49 (m)                                                                      |                        |                        | C-3'                  |                        |
| 4'       | 131.3                        | 7.48 (m)                                                                      |                        |                        | C-4'                  |                        |
| 1''      | 54.9                         | α: 2.96 (dd, $J_{1''\alpha, 1''\beta} = 14.4$ , $J_{1''\alpha, 2''} = 6.29$ ) | H-2'', H-1''β          | 1''β                   | C-1''                 | C-6, C-8, C-2'', C-7'' |
|          |                              | β: 3.07 (dd, $J_{1''\beta, 1''\alpha} = 14.4$ , $J_{1''\beta, 2''} = 8.44$ )  | H-2'', H-1''α          | 1''α                   | C-1''                 |                        |
| 2''      | 37.0                         | 1.46 (m)                                                                      | H-1''α, H-1''β         |                        | C-2''                 | C-1''                  |
| 3''      | 26.6                         | A: 1.55 (m)                                                                   |                        |                        | C-3''                 |                        |
|          |                              | B: 1.15 (m)                                                                   |                        |                        | C-3''                 |                        |
| 4''      | 27.1                         | 1.16 (m)                                                                      | H-5''                  |                        | C-4''                 |                        |
| 5''      | 31.6                         | 0.86 (m)                                                                      | H-4''                  |                        | C-5''                 |                        |
| 6''      | 26.5                         | 1.69 (m)                                                                      |                        |                        | C-6''                 |                        |
| 7''      | 31.5                         | A: 1.54 (m)                                                                   |                        |                        | C-7''                 | C-1''                  |
|          |                              | B: 1.67 (m)                                                                   |                        |                        | C-7''                 |                        |

<sup>a</sup> <sup>1</sup>H (400 MHz) and <sup>13</sup>C (100 MHz) NMR spectral data obtained in CD<sub>3</sub>OD. <sup>b</sup> Signal multiplicity and coupling constants in Hz are given in parentheses. <sup>c</sup> Signals correlate with <sup>1</sup>H resonance. <sup>d</sup> Mixing time 500 milliseconds. <sup>e</sup> Optimized for  $^1J_{C,H} = 145$  Hz. <sup>f</sup> Optimized for  $^nJ_{C,H} = 7.7$  Hz.
